# Supplementary material
Source: Research Square preprint supplement (doi:10.21203/rs.3.rs-8870496/v1)
Supplement: Supplementary file 1 [file 0f559c8fe0e99e01398c64cf.pdf]

## Supplementary Information

---

Projecting nitrogen fertilizer use in Africa using empirically bounded historical drivers

---

# Supplementary Figures

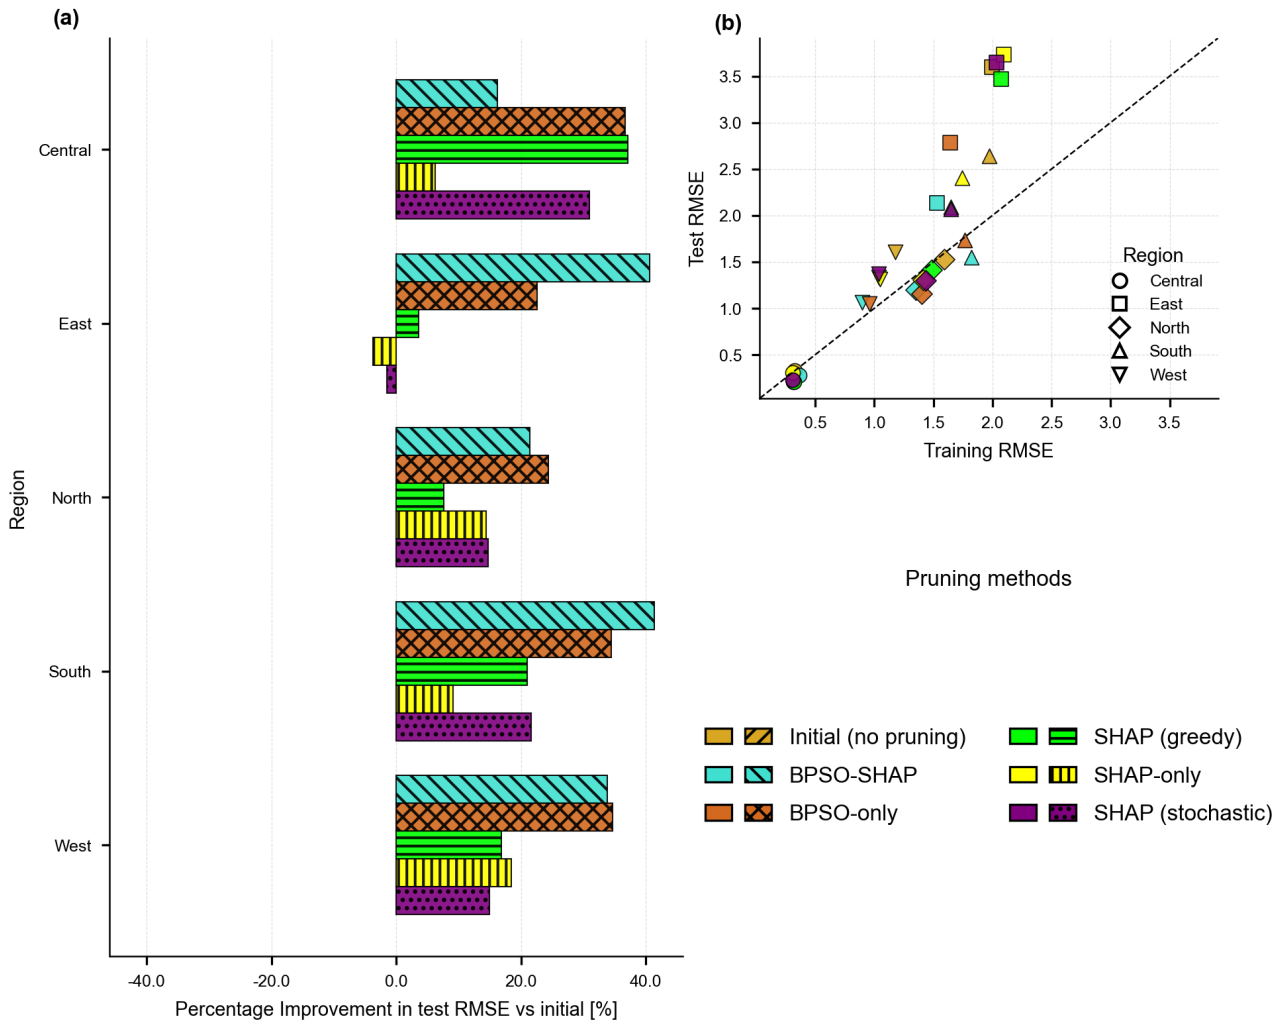

**Supplementary Fig. S1 | Feature pruning improves accuracy and yields compact regional fertilizer-intensity models.** (a) Percentage change in test root mean squared error (RMSE) relative to the unpruned initial model, shown for each region and pruning strategy. Positive values indicate reduced error (improved performance), whereas negative values indicate degradation. (b) Training versus test RMSE for each region–method combination. The dashed line indicates equal training and test error; points near this line indicate good generalization, while points above it indicate overfitting. Optimization-based pruning (BPSO-only and SHAP-guided BPSO) yields consistent error reductions without widening the train–test gap. See Supplementary Tables 6–7.

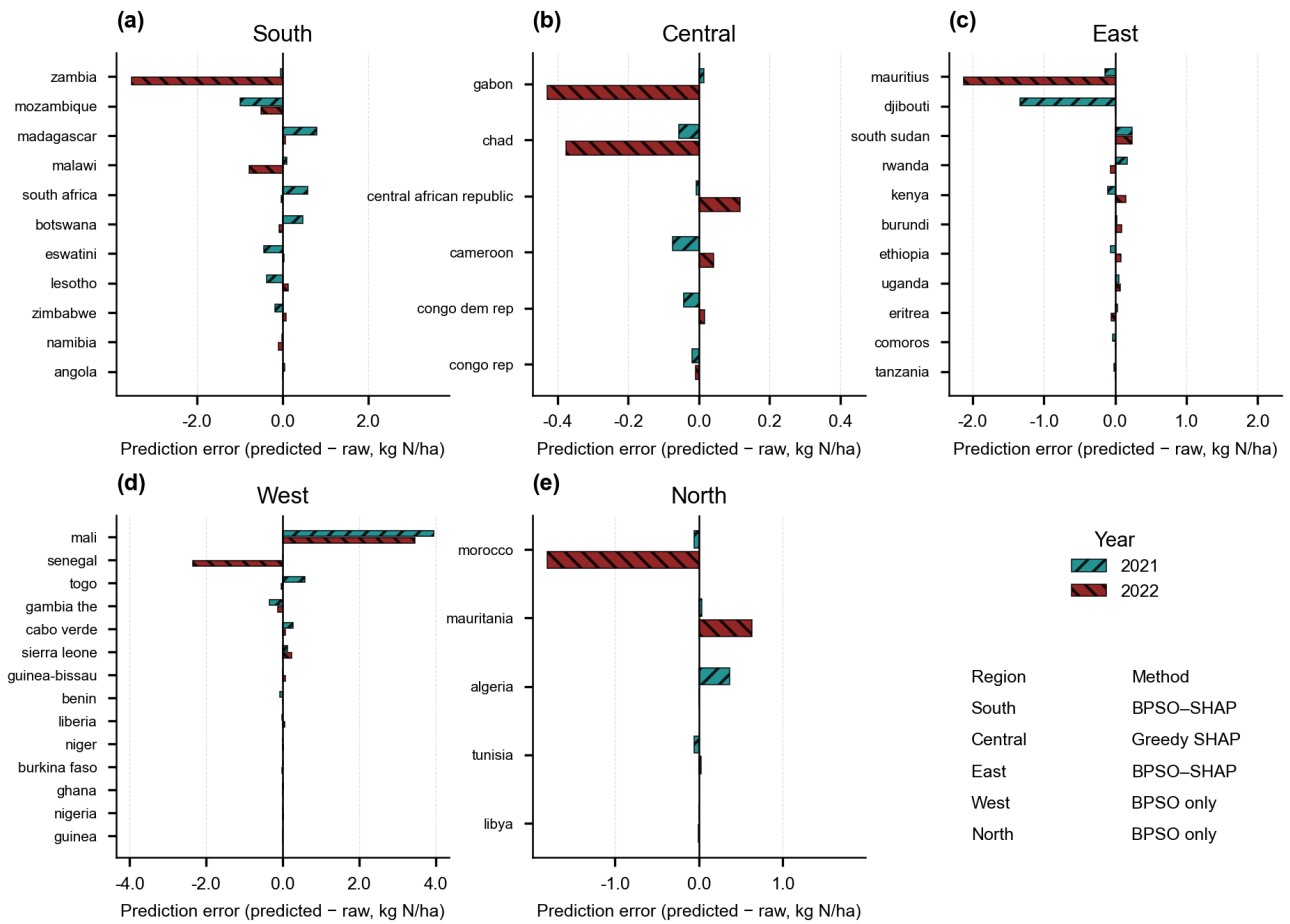

**Supplementary Fig. S2 | Prediction-error tornado plots for regional fertilizer-intensity models.** Tornado plots rank the largest country-level prediction errors for each regional model and SHAP-based Binary Particle Swarm Optimization pruning configuration on held-out data.

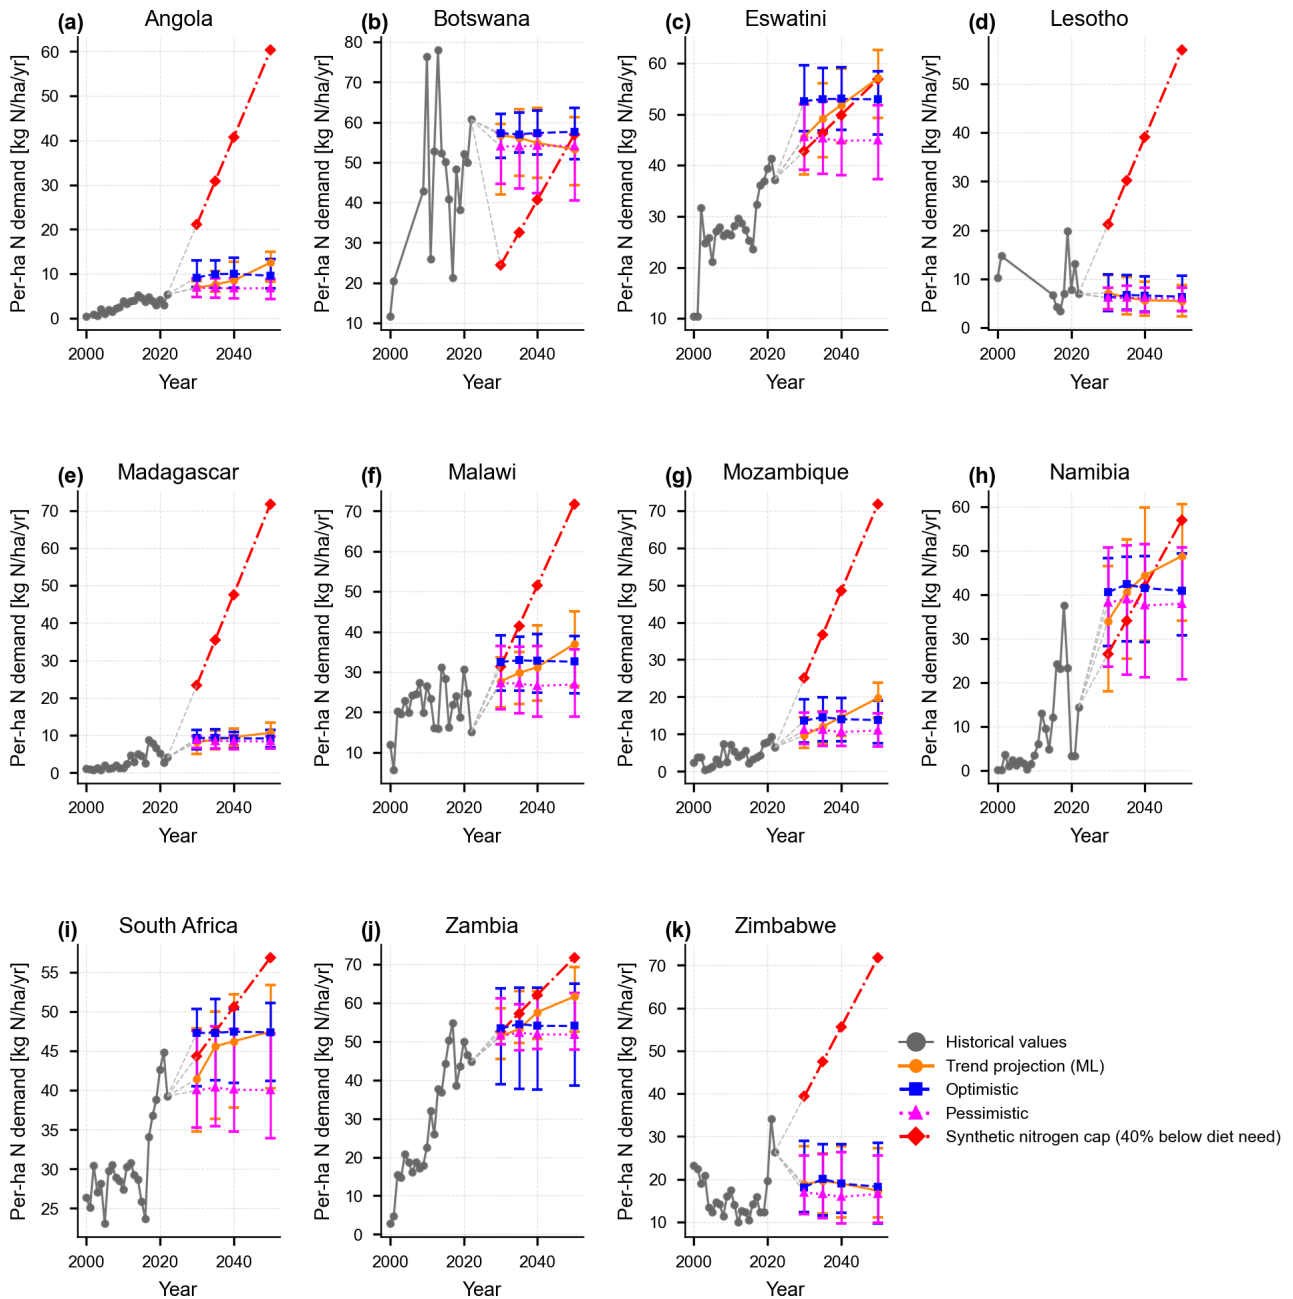

**Supplementary Fig. S3 | Country-level fertilizer-intensity trajectories under alternative scenarios: Southern Africa.** Country trajectories of nitrogen fertilizer intensity under business-as-usual (BAU), optimistic, and pessimistic scenarios. BAU is obtained by extrapolating driver variables forward in time and evaluating the extrapolated inputs using the trained regional model. Optimistic and pessimistic scenarios are obtained by applying SHAP-guided percentile shifts to a subset of influential, perturbable drivers. All shifts are constrained to empirically observed bounds and non-perturbable drivers remain at BAU. Uncertainty bands summarize uncertainty across bootstrap model ensembles. See Methods: Business-as-usual extrapolation, Percentile mapping and SHAP-guided constrained scenario optimisation, and Uncertainty quantification and scenario robustness.

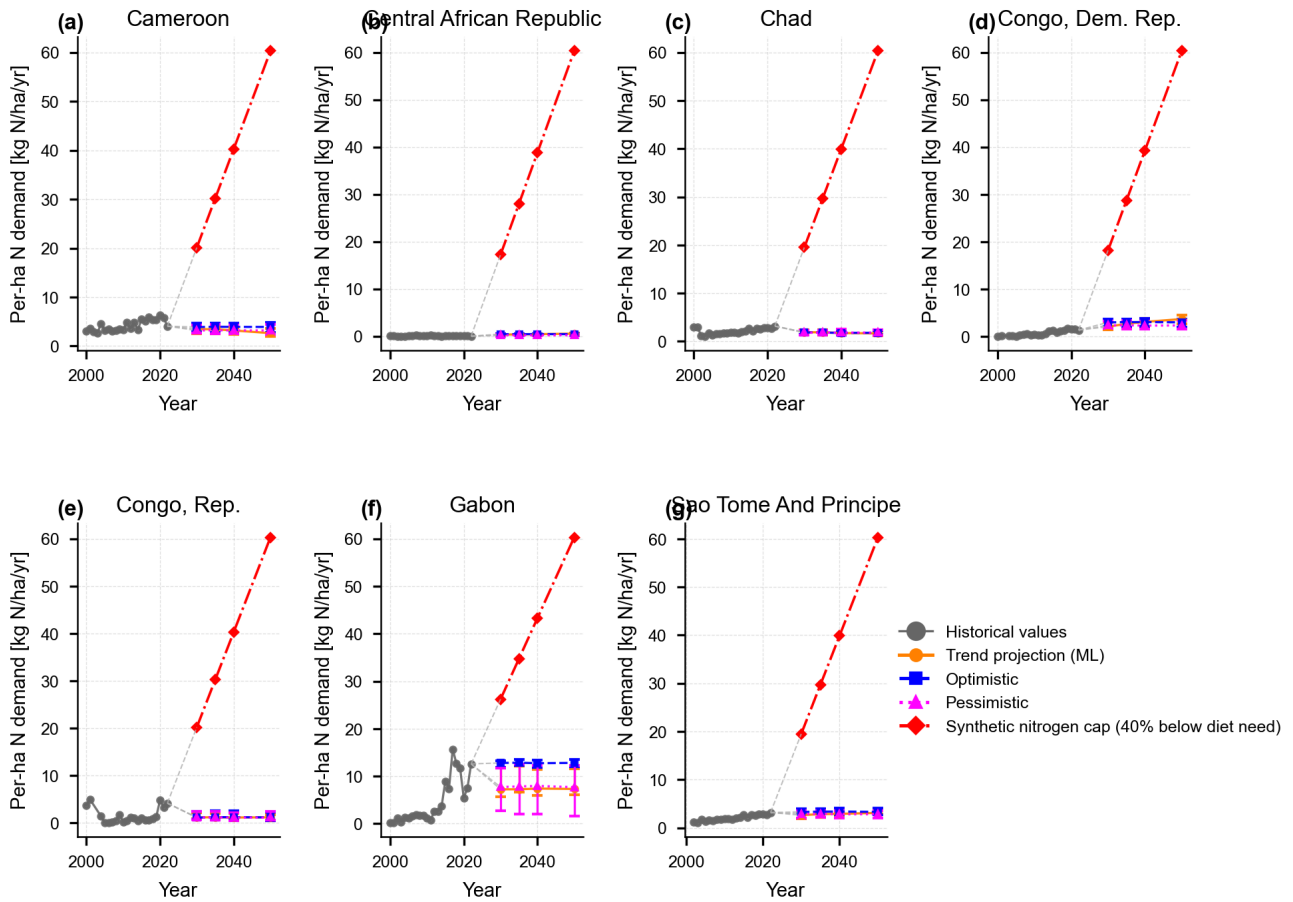

**Supplementary Fig. S4 | Country-level fertilizer-intensity trajectories under alternative scenarios: Central Africa.** Country trajectories of nitrogen fertilizer intensity under business-as-usual (BAU), optimistic, and pessimistic scenarios. BAU is obtained by extrapolating driver variables forward in time and evaluating the extrapolated inputs using the trained regional model. Optimistic and pessimistic scenarios are obtained by applying SHAP-guided percentile shifts to a subset of influential, perturbable drivers. All shifts are constrained to empirically observed bounds and non-perturbable drivers remain at BAU. Uncertainty bands summarize uncertainty across bootstrap model ensembles. See Methods: Business-as-usual extrapolation, Percentile mapping and SHAP-guided constrained scenario optimisation, and Uncertainty quantification and scenario robustness.

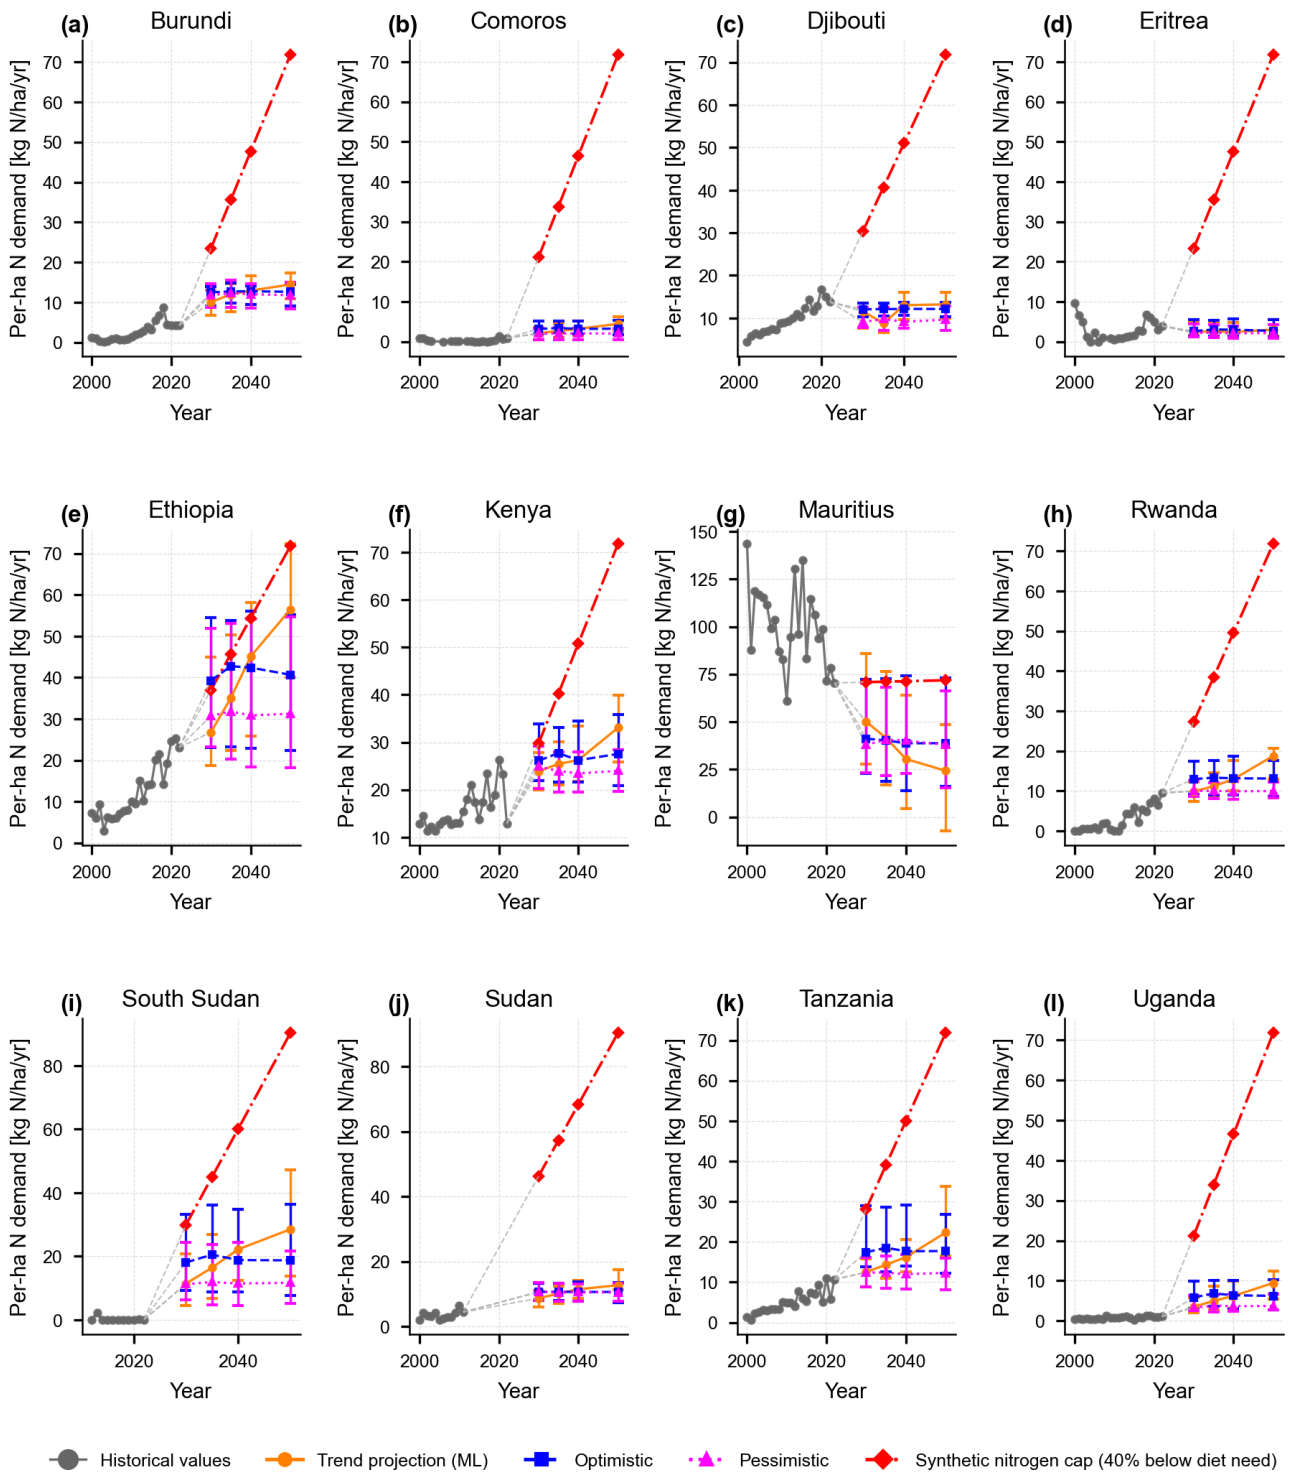

**Supplementary Fig. S5 | Country-level fertilizer-intensity trajectories under alternative scenarios: East Africa.** Country trajectories of nitrogen fertilizer intensity under business-as-usual (BAU), optimistic, and pessimistic scenarios. BAU is obtained by extrapolating driver variables forward in time and evaluating the extrapolated inputs using the trained regional model. Optimistic and pessimistic scenarios are obtained by applying SHAP-guided percentile shifts to a subset of influential, perturbable drivers. All shifts are constrained to empirically observed bounds and non-perturbable drivers remain at BAU. Uncertainty bands summarize uncertainty across bootstrap model ensembles. See Methods: Business-as-usual extrapolation, Percentile mapping and SHAP-guided constrained scenario optimisation, and Uncertainty quantification and scenario robustness.

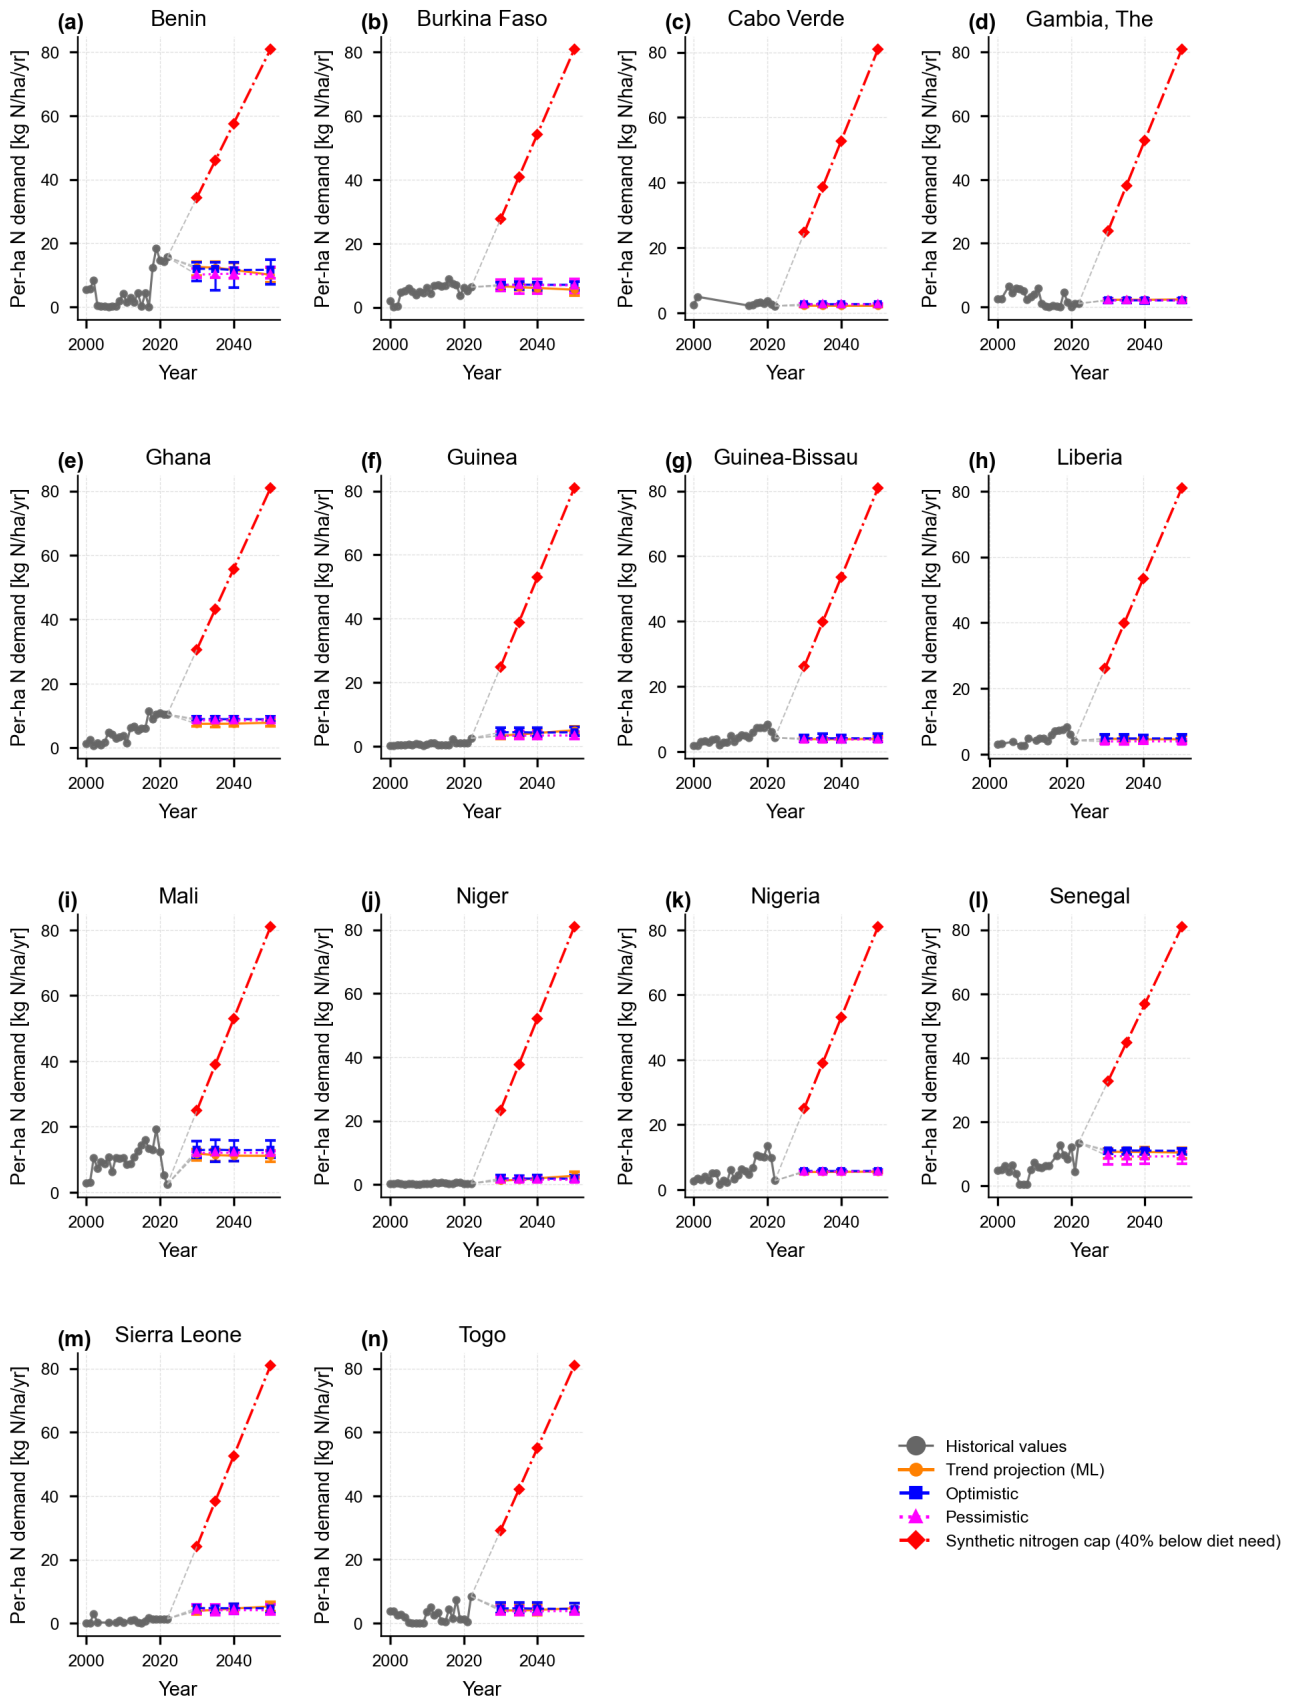

**Supplementary Fig. S6 | Country-level fertilizer-intensity trajectories under alternative scenarios: West Africa.** Country trajectories of nitrogen fertilizer intensity under business-as-usual (BAU), optimistic, and pessimistic scenarios. BAU is obtained by extrapolating driver variables forward in time and evaluating the extrapolated inputs using the trained regional model. Optimistic and pessimistic scenarios are obtained by applying SHAP-guided percentile shifts to a subset of influential, perturbable drivers. All shifts are constrained to empirically observed bounds and non-perturbable drivers remain at BAU. Uncertainty bands summarize uncertainty across bootstrap model ensembles. See Methods: Business-as-usual extrapolation, Percentile mapping and SHAP-guided constrained scenario optimisation, and Uncertainty quantification and scenario robustness.

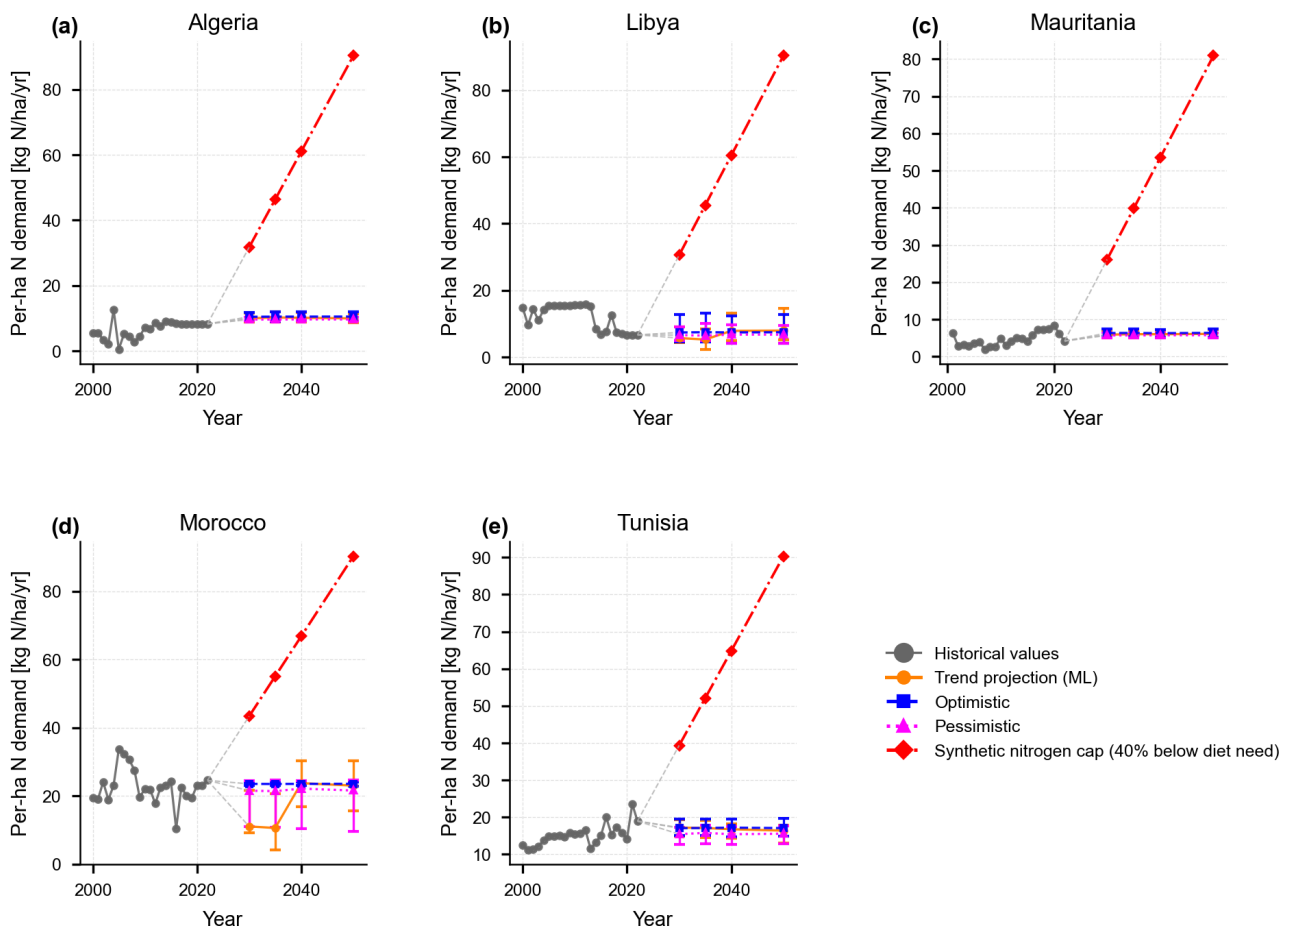

**Supplementary Fig. S7 | Country-level fertilizer-intensity trajectories under alternative scenarios: North Africa.** Country trajectories of nitrogen fertilizer intensity under business-as-usual (BAU), optimistic, and pessimistic scenarios. BAU is obtained by extrapolating driver variables forward in time and evaluating the extrapolated inputs using the trained regional model. Optimistic and pessimistic scenarios are obtained by applying SHAP-guided percentile shifts to a subset of influential, perturbable drivers. All shifts are constrained to empirically observed bounds and non-perturbable drivers remain at BAU. Uncertainty bands summarize uncertainty across bootstrap model ensembles. See Methods: Business-as-usual extrapolation, Percentile mapping and SHAP-guided constrained scenario optimization, and Uncertainty quantification and scenario robustness.

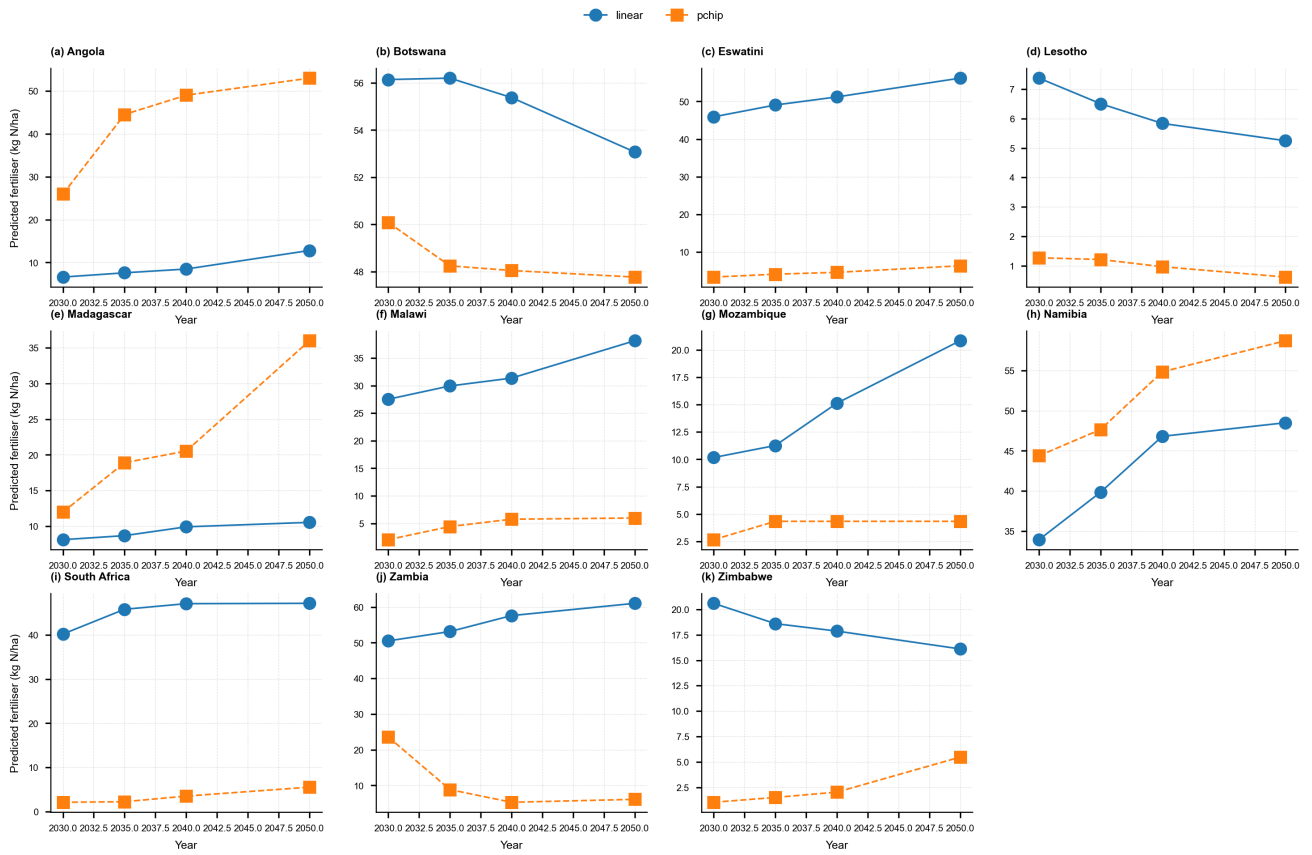

**Supplementary Fig. S8 | Linear vs PCHIP driver extrapolation in BAU projections: Southern Africa.** Comparison of BAU fertilizer-intensity trajectories generated by linear extrapolation of driver variables versus a shape-preserving piecewise-cubic Hermite interpolating polynomial (PCHIP) interpolation or extrapolation. In both cases, extrapolated drivers are evaluated through the fitted regional model to obtain BAU intensity trajectories. See Methods: Business-as-usual extrapolation.

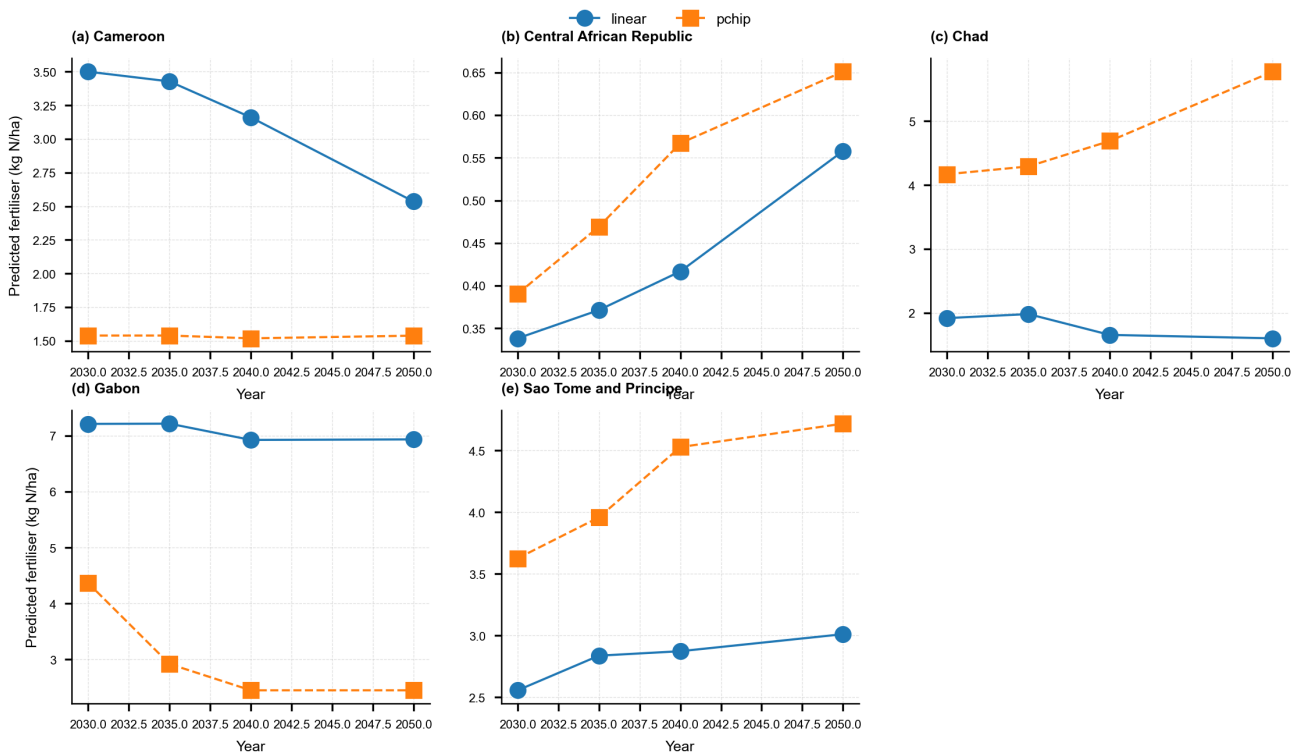

**Supplementary Fig. S9 | Linear vs PCHIP driver extrapolation in BAU projections: Central Africa.** Comparison of BAU fertilizer-intensity trajectories generated by linear extrapolation of driver variables versus a shape-preserving piecewise-cubic Hermite interpolating polynomial (PCHIP) interpolation or extrapolation. In both cases, extrapolated drivers are evaluated through the fitted regional model to obtain BAU intensity trajectories. See Methods: Business-as-usual extrapolation.

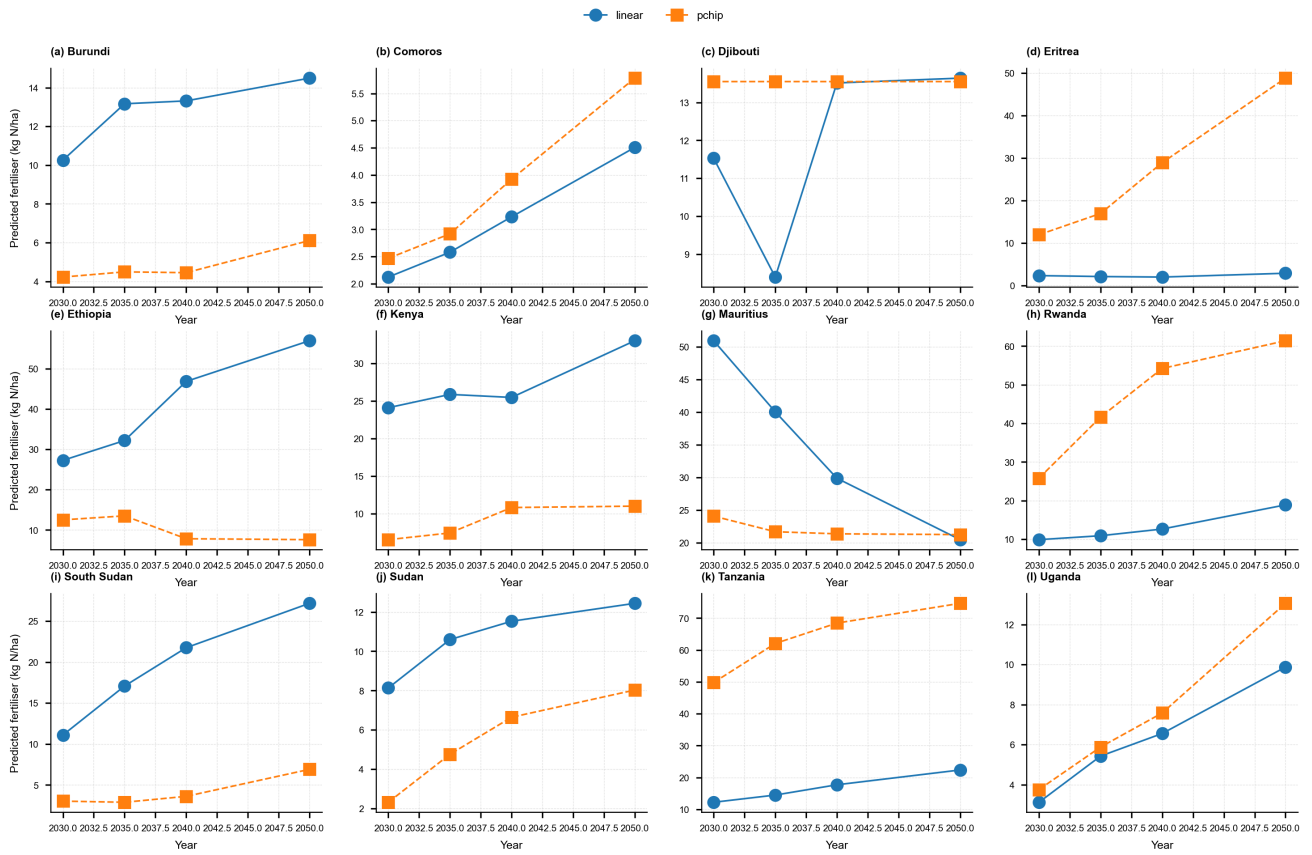

**Supplementary Fig. S10 | Linear vs PCHIP driver extrapolation in BAU projections: East Africa.** Comparison of BAU fertilizer-intensity trajectories generated by linear extrapolation of driver variables versus a shape-preserving piecewise-cubic Hermite interpolating polynomial (PCHIP) interpolation or extrapolation. In both cases, extrapolated drivers are evaluated through the fitted regional model to obtain BAU intensity trajectories. See Methods: Business-as-usual extrapolation.

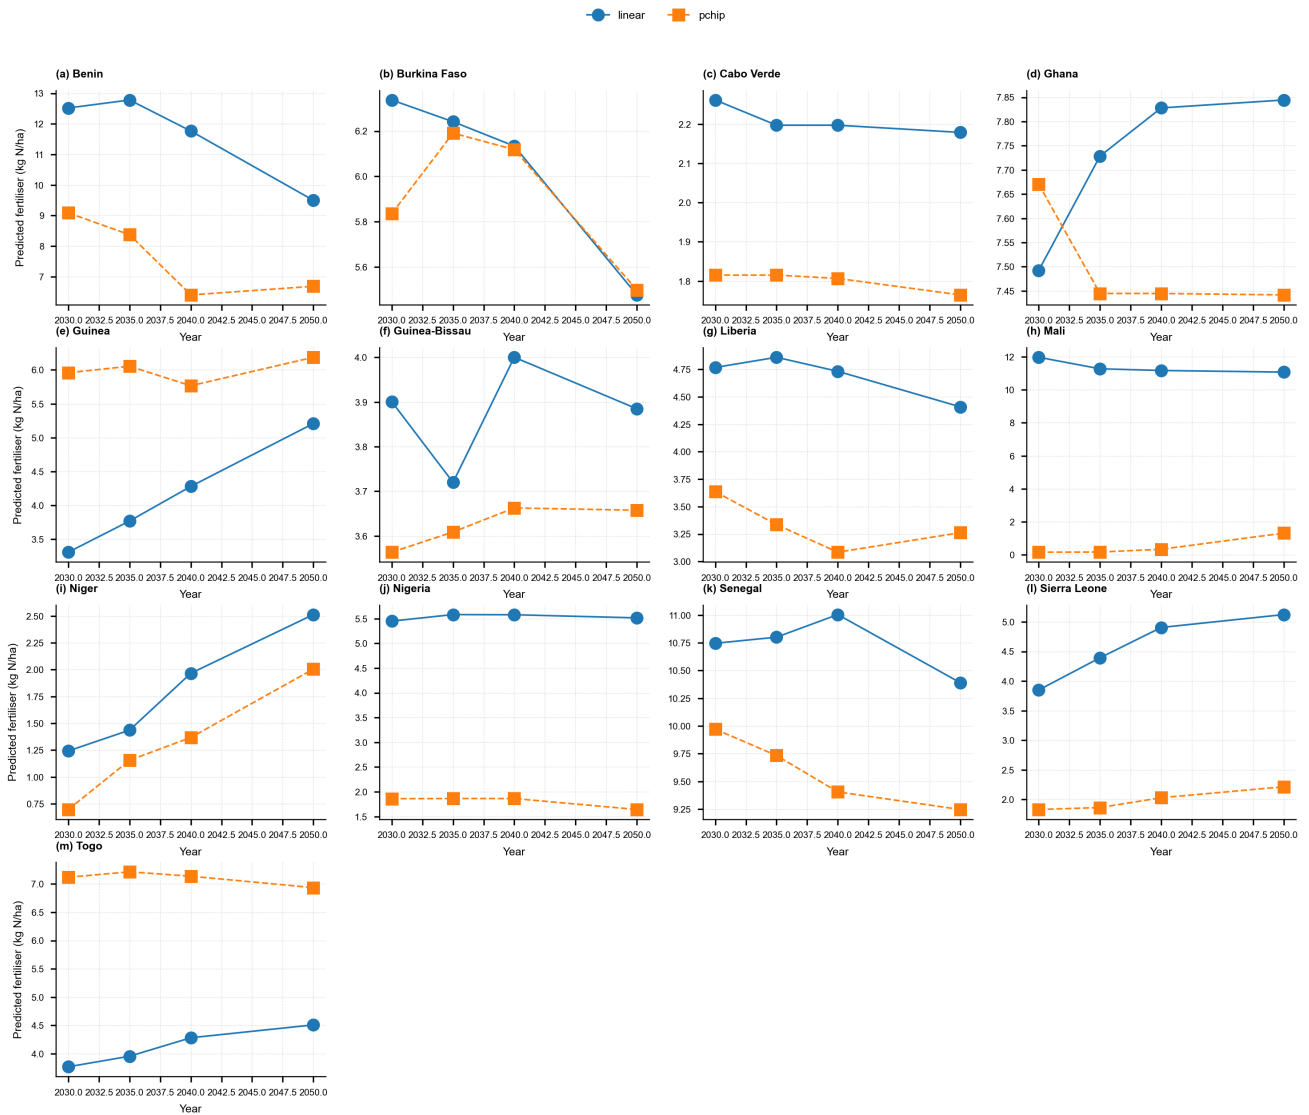

**Supplementary Fig. S11 | Linear vs PCHIP driver extrapolation in BAU projections: West Africa.** Comparison of BAU fertilizer-intensity trajectories generated by linear extrapolation of driver variables versus a shape-preserving piecewise-cubic Hermite interpolating polynomial (PCHIP) interpolation or extrapolation. In both cases, extrapolated drivers are evaluated through the fitted regional model to obtain BAU intensity trajectories. See Methods: Business-as-usual extrapolation.

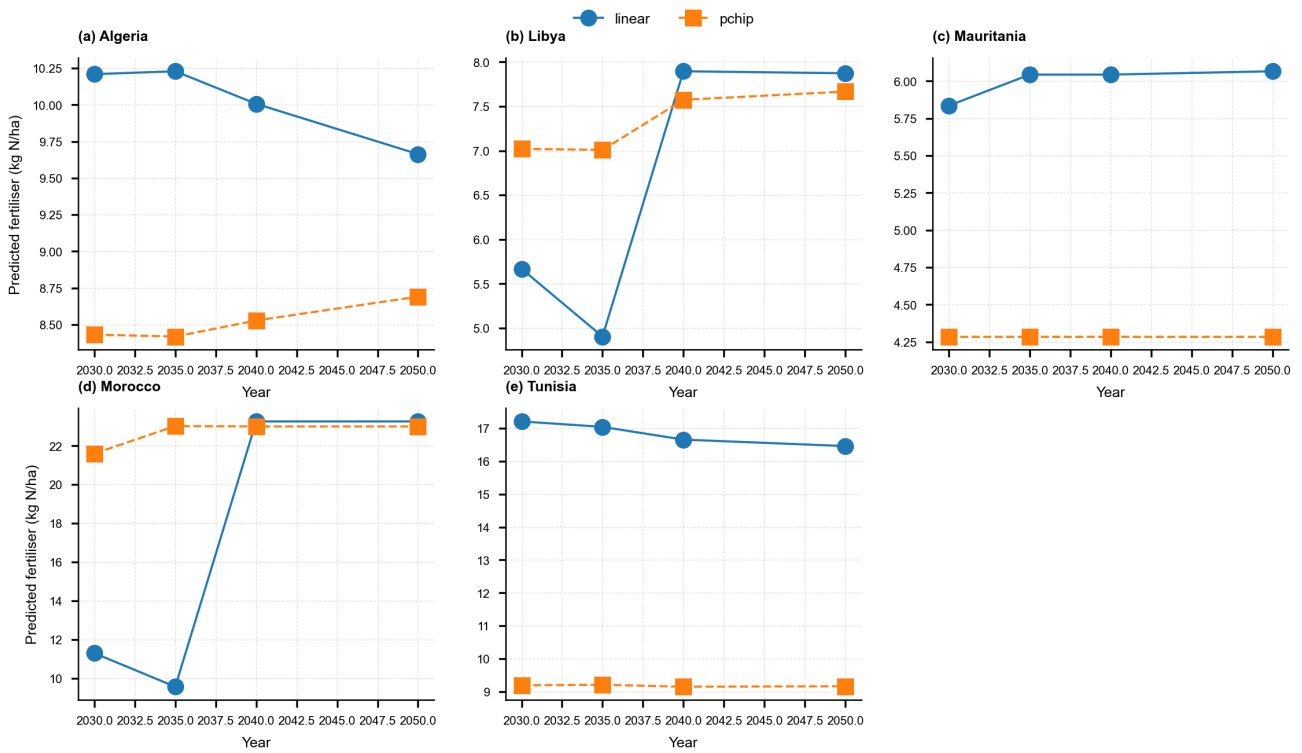

**Supplementary Fig. S12 | Linear vs PCHIP driver extrapolation in BAU projections: North Africa.** Comparison of BAU fertilizer-intensity trajectories generated by linear extrapolation of driver variables versus a shape-preserving piecewise-cubic Hermite interpolating polynomial (PCHIP) interpolation or extrapolation. In both cases, extrapolated drivers are evaluated through the fitted regional model to obtain BAU intensity trajectories. See Methods: Business-as-usual extrapolation.

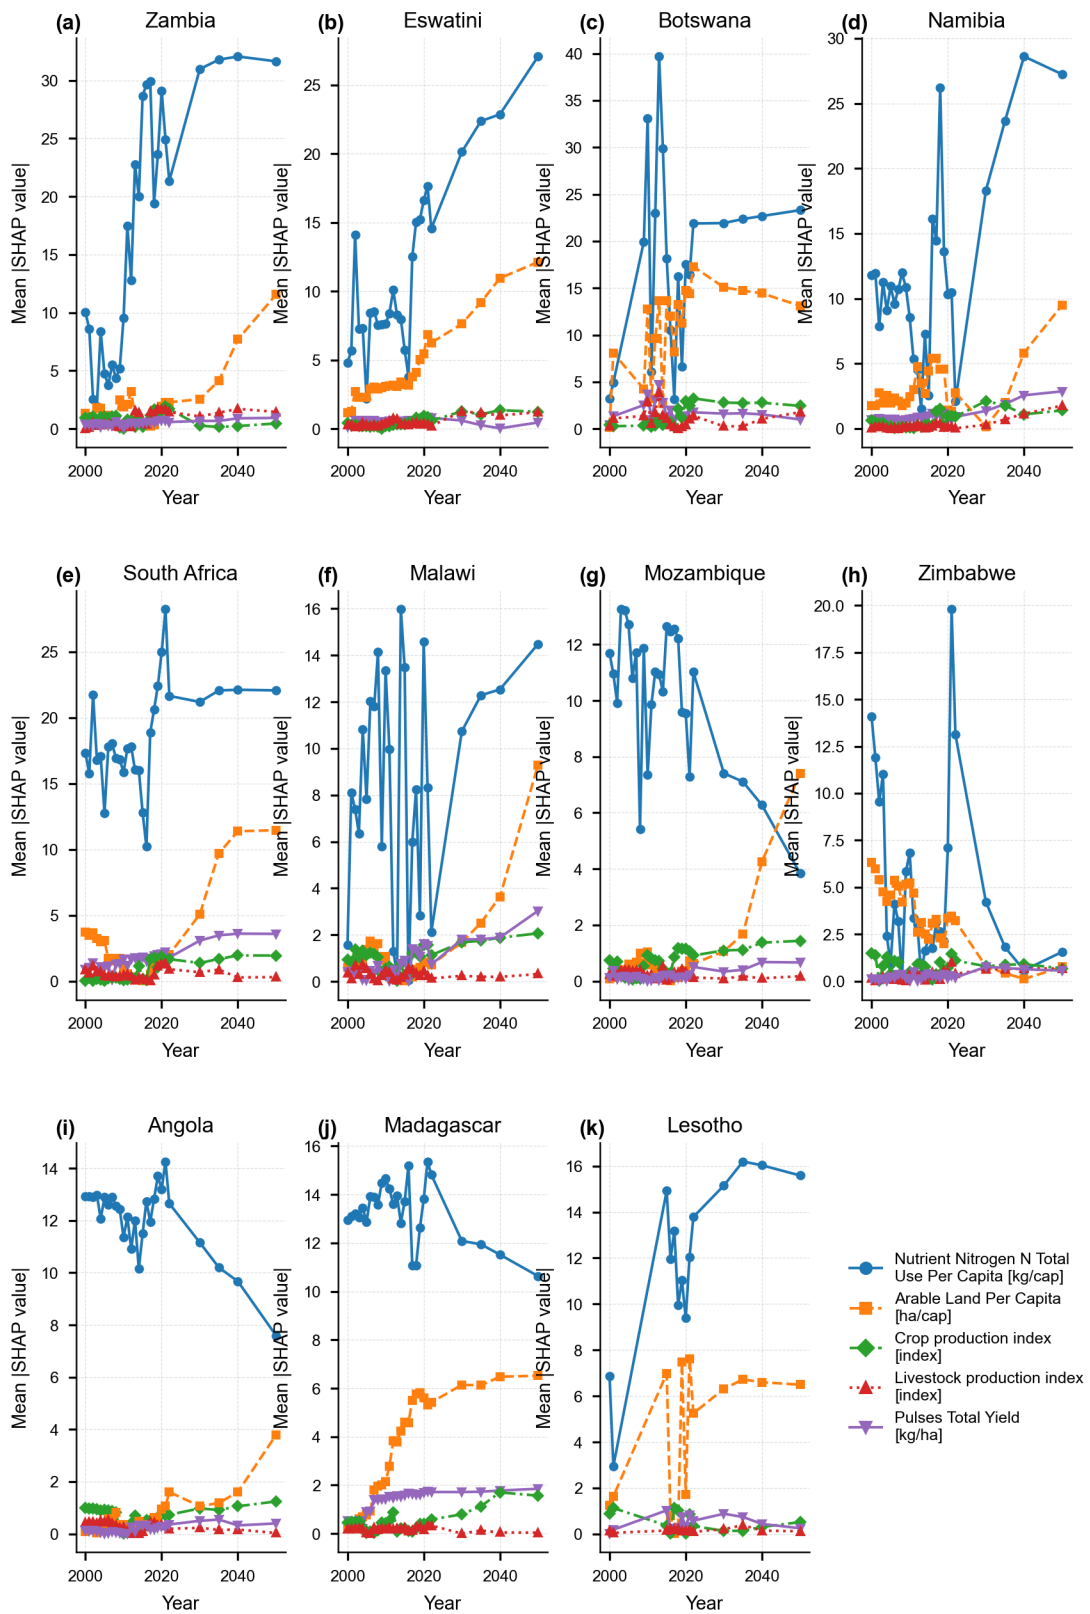

**Supplementary Fig. S13 | SHAP driver contributions over time: Southern Africa.** Mean absolute SHAP values by calendar year for the pruned regional model. Each series corresponds to one driver shown in the figure. Values summarize the magnitude of feature contributions to predicted nitrogen fertilizer intensity in that year. See Methods: Model attribution and global driver scores.

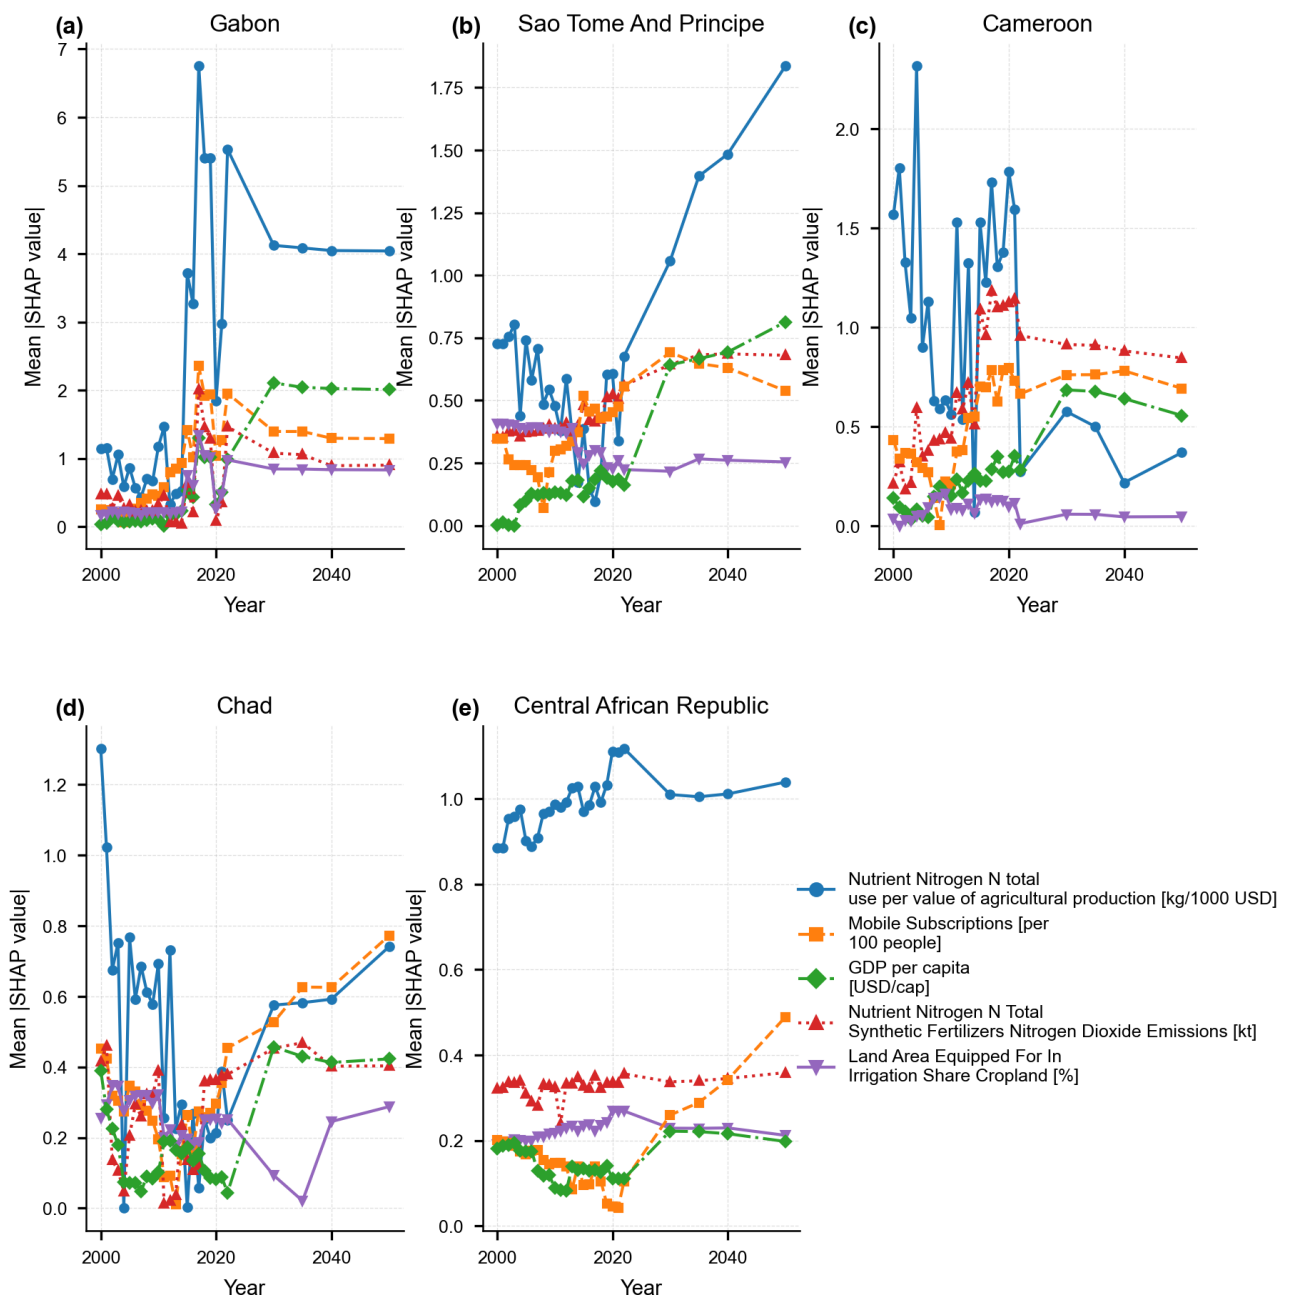

**Supplementary Fig. S14 | SHAP driver contributions over time: Central Africa.** Mean absolute SHAP values by calendar year for the pruned regional model. Each series corresponds to one driver shown in the figure. Values summarize the magnitude of feature contributions to predicted nitrogen fertilizer intensity in that year. See Methods: Model attribution and global driver scores.

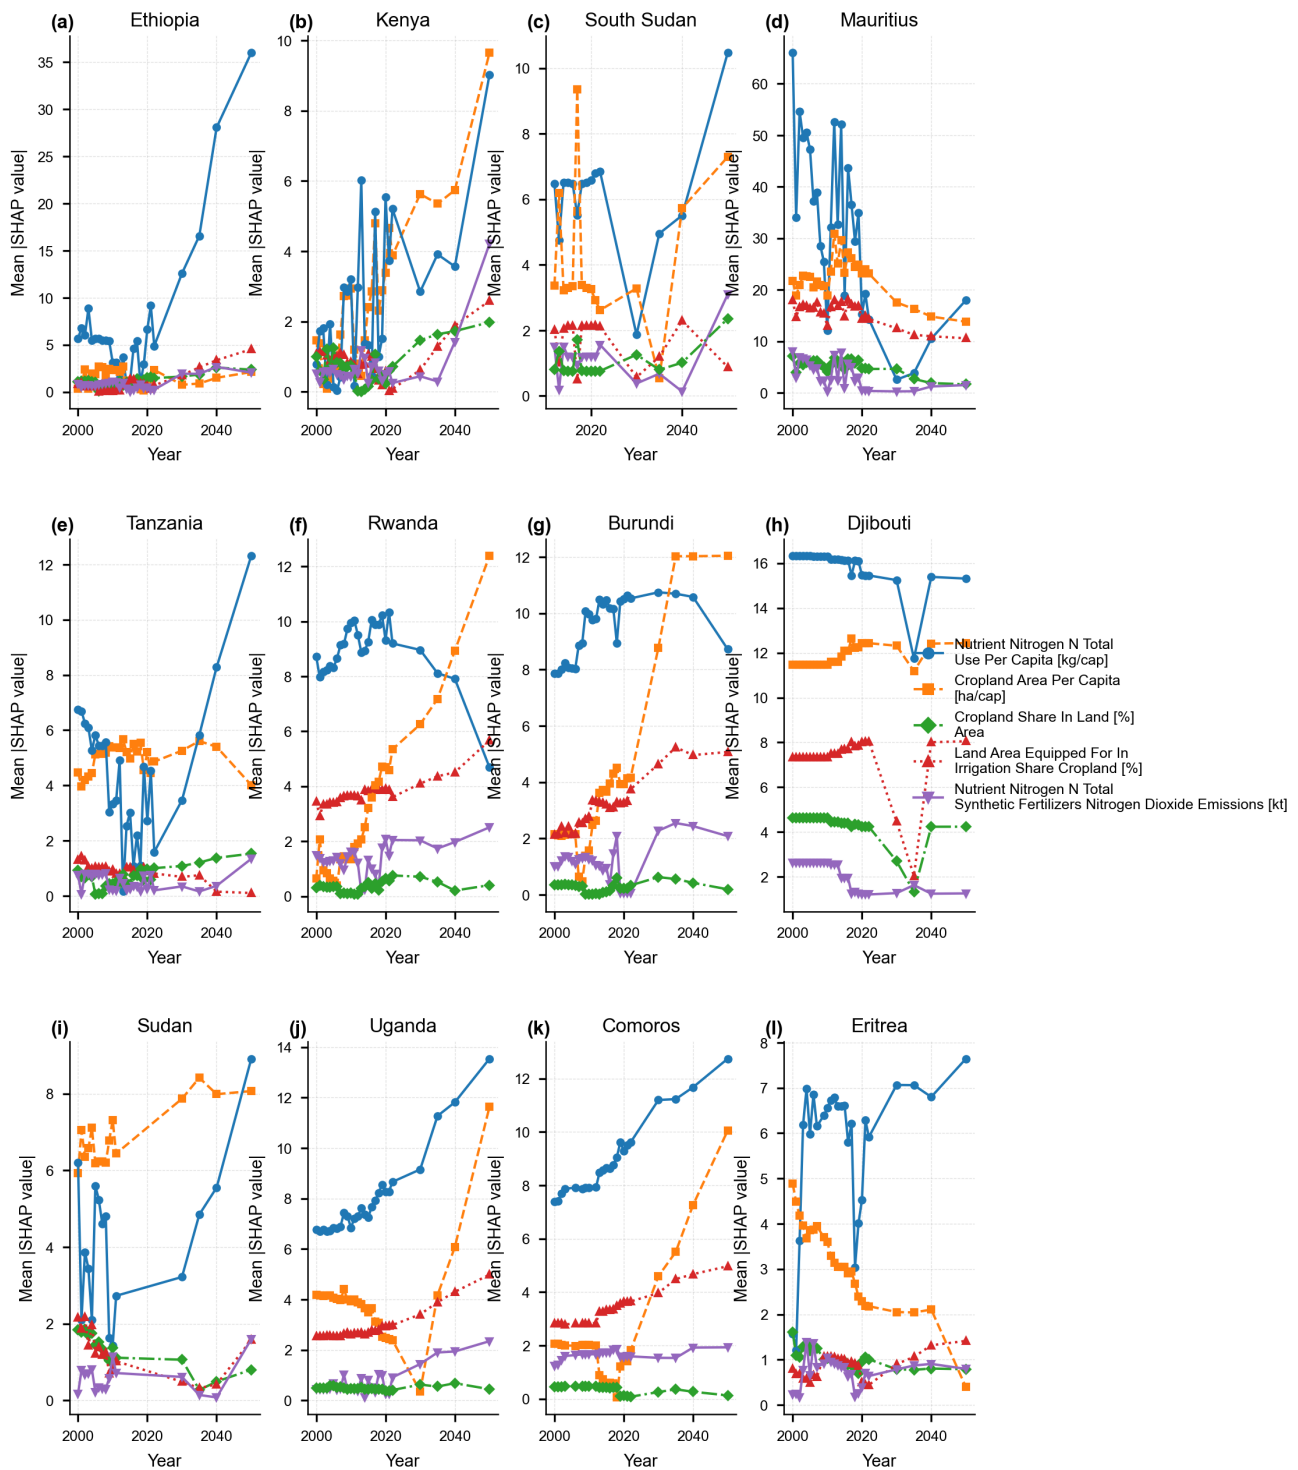

**Supplementary Fig. S15 | SHAP driver contributions over time: East Africa.** Mean absolute SHAP values by calendar year for the pruned regional model. Each series corresponds to one driver shown in the figure. Values summarize the magnitude of feature contributions to predicted nitrogen fertilizer intensity in that year. See Methods: Model attribution and global driver scores.

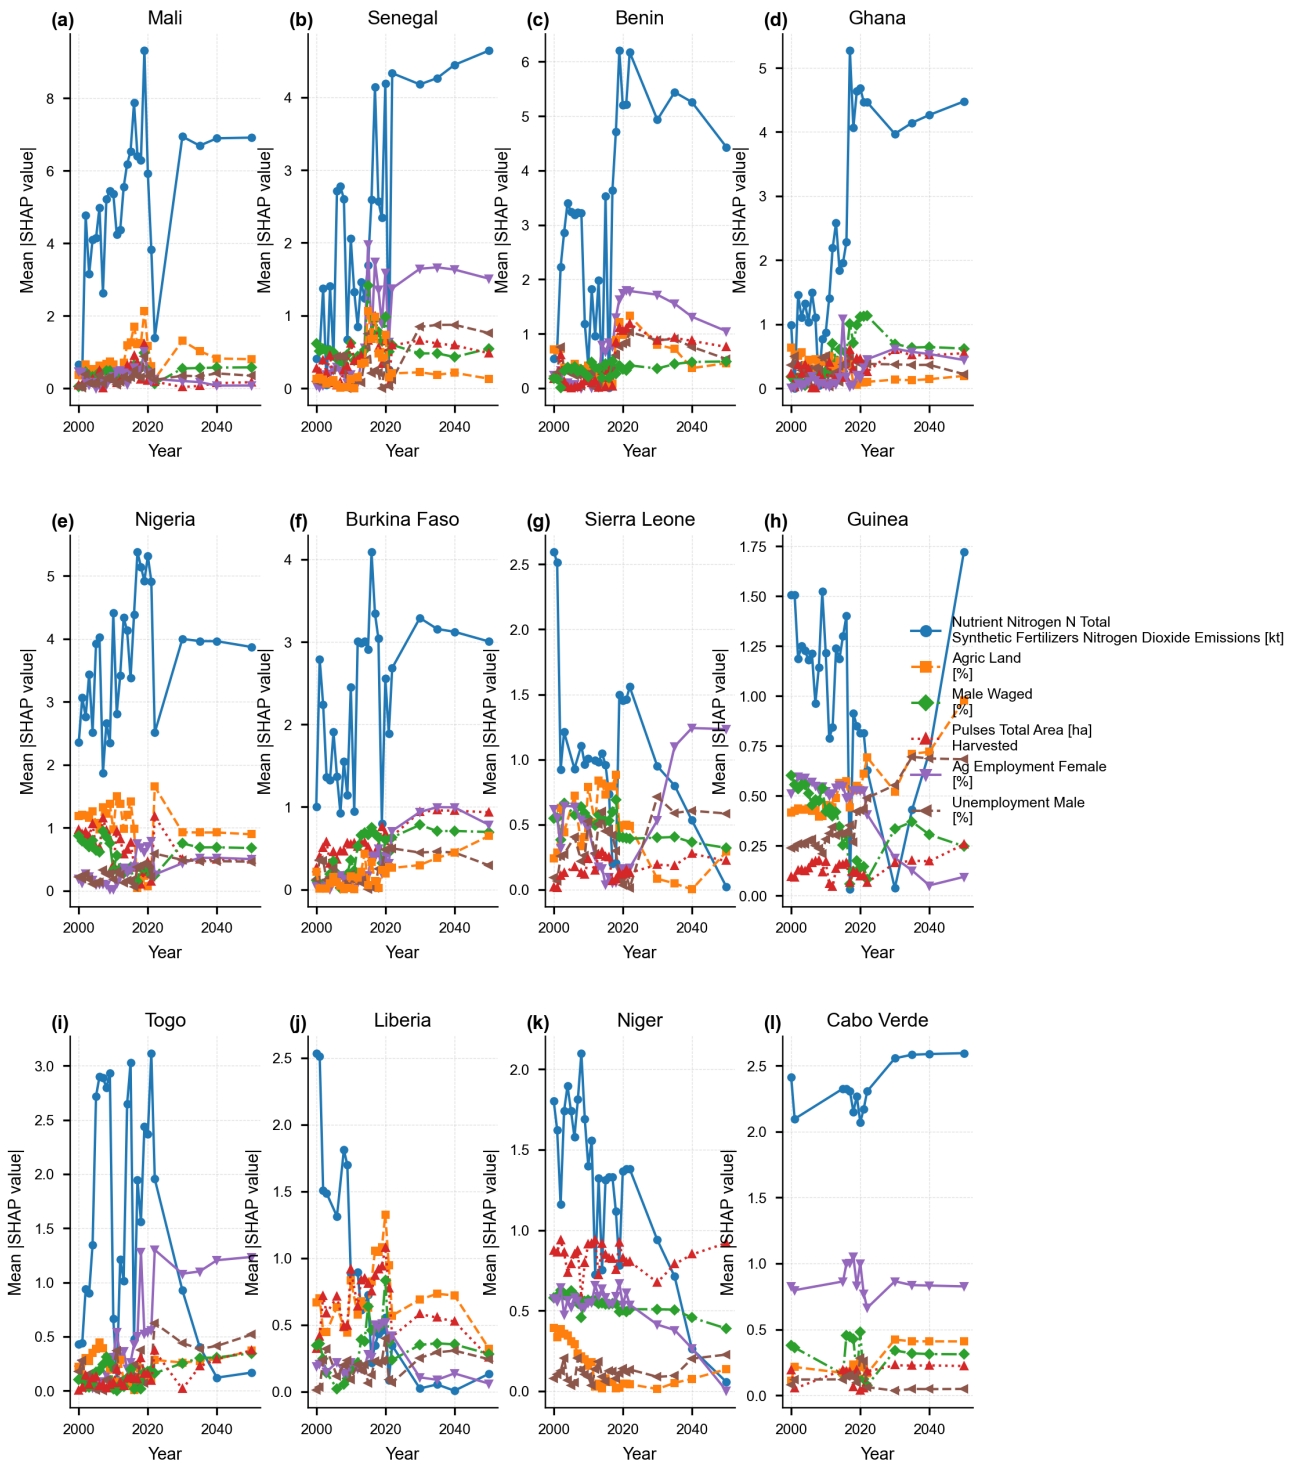

**Supplementary Fig. S16 | SHAP driver contributions over time: West Africa.** Mean absolute SHAP values by calendar year for the pruned regional model. Each series corresponds to one driver shown in the figure. Values summarize the magnitude of feature contributions to predicted nitrogen fertilizer intensity in that year. See Methods: Model attribution and global driver scores.

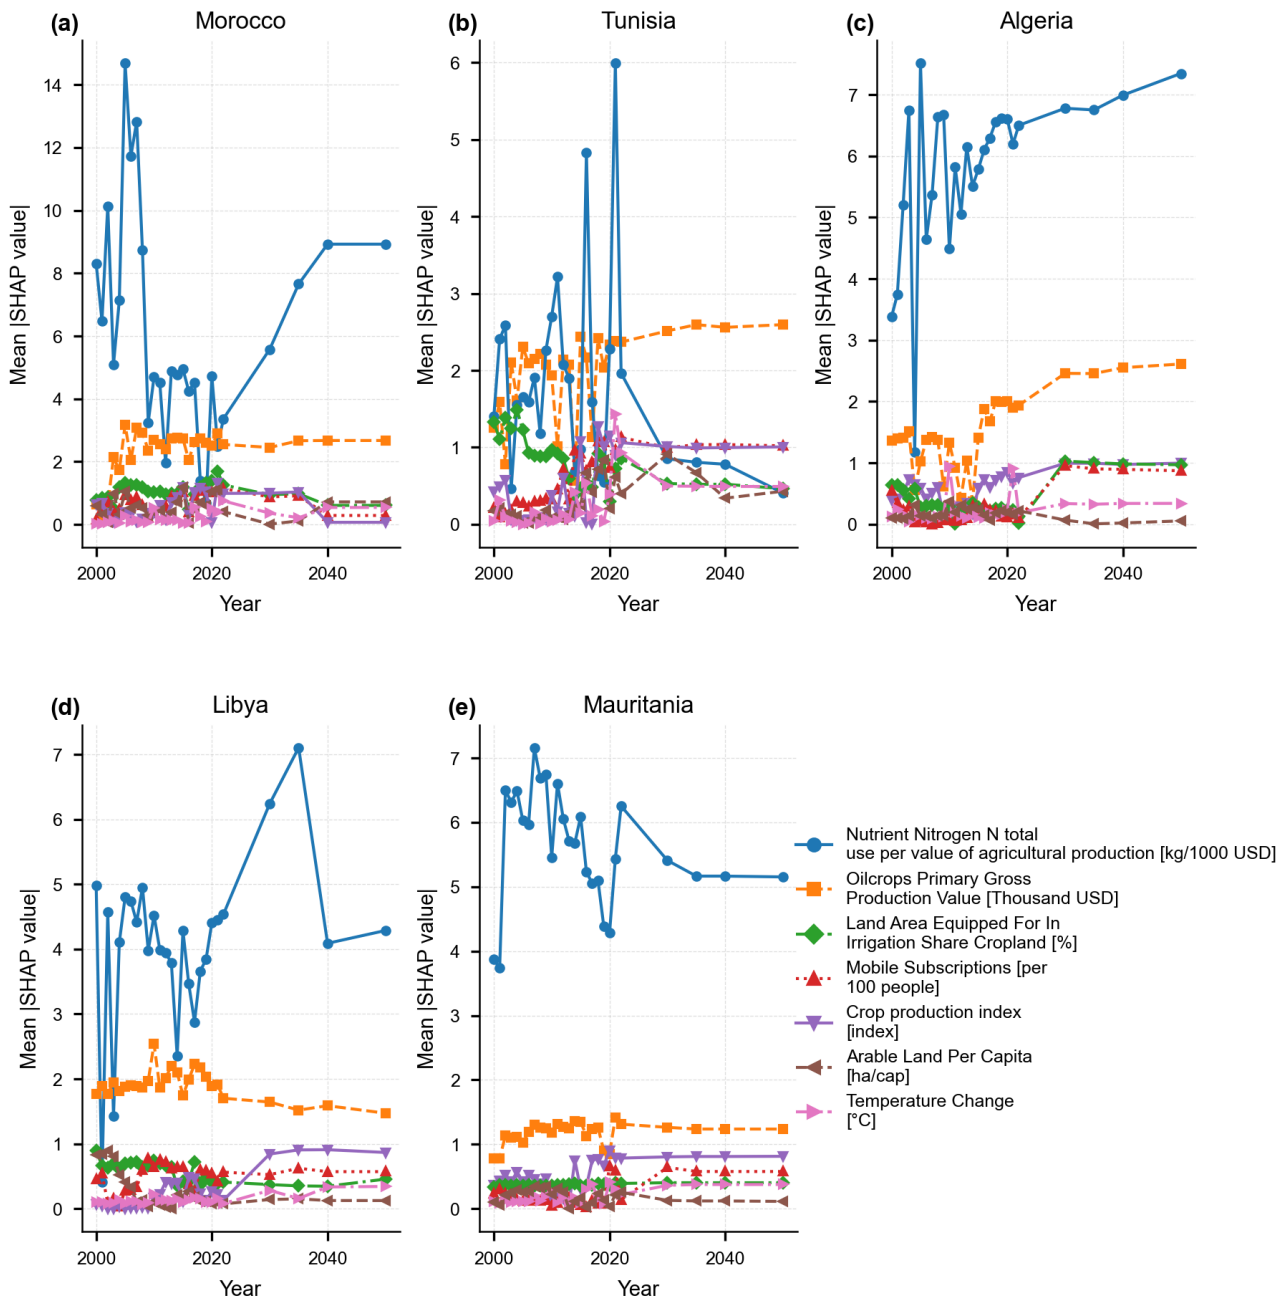

**Supplementary Fig. S17 | SHAP driver contributions over time: North Africa.** Mean absolute SHAP values by calendar year for the pruned regional model. Each series corresponds to one driver shown in the figure. Values summarize the magnitude of feature contributions to predicted nitrogen fertilizer intensity in that year. See Methods: Model attribution and global driver scores.

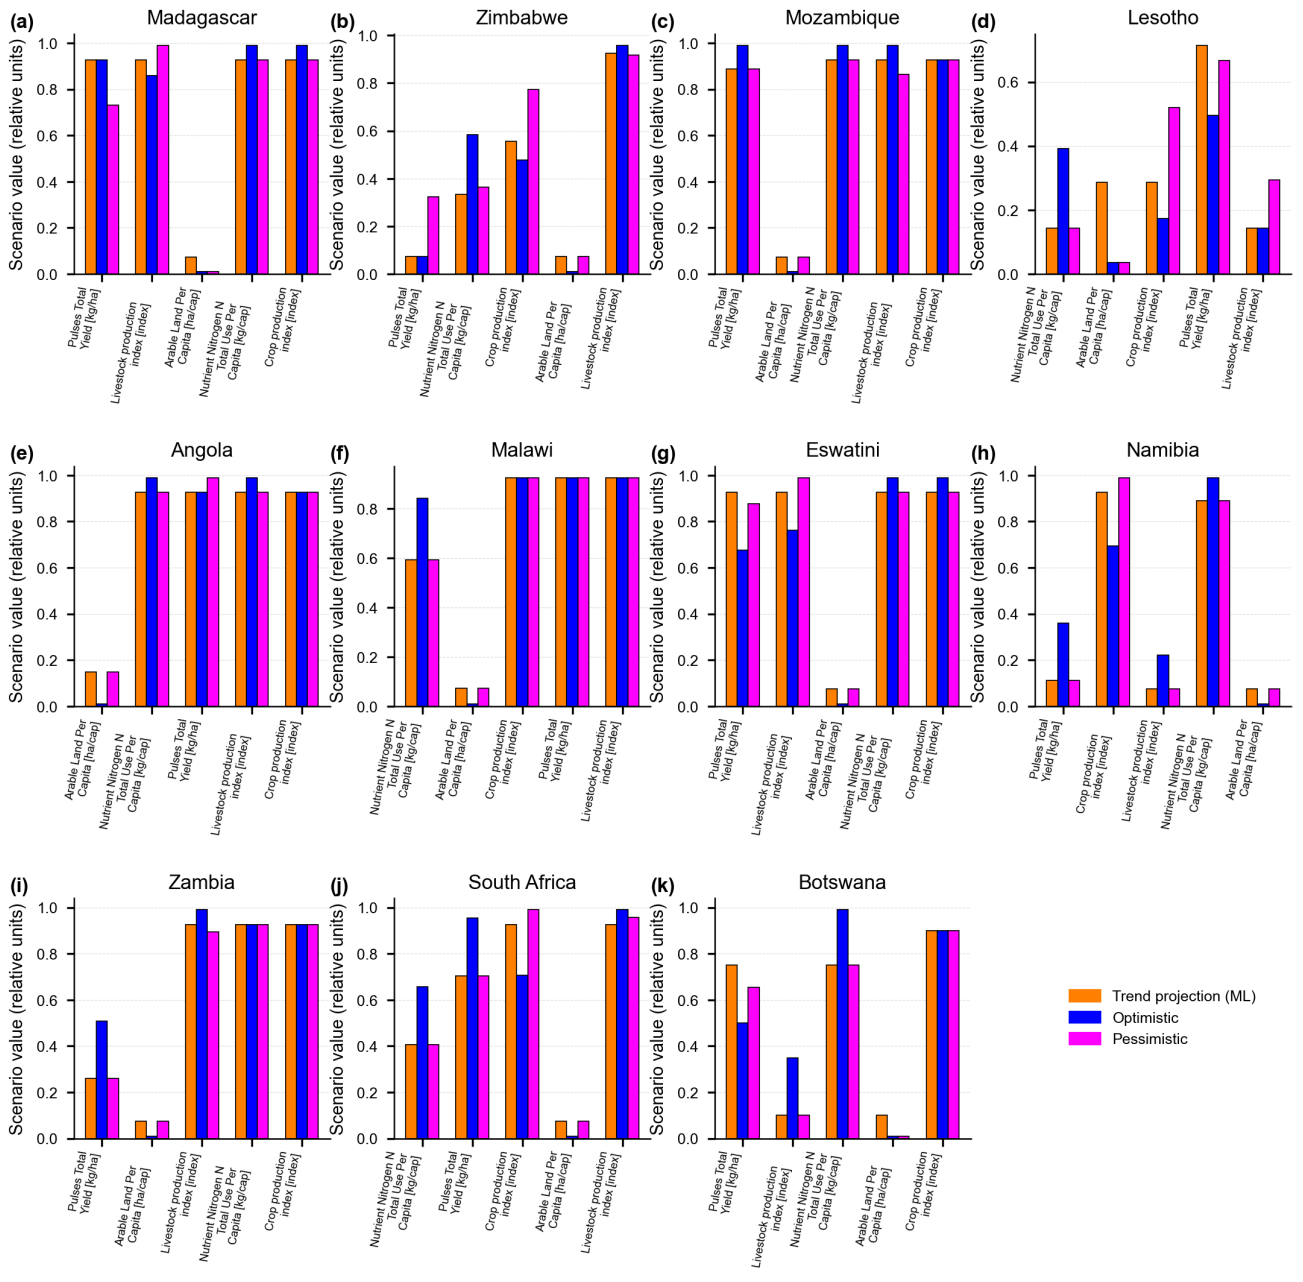

**Supplementary Fig. S18 | Regional SHAP driver portfolio and perturbable levers: Southern Africa.** SHAP-based driver portfolio for the pruned regional model. The figure summarizes the relative contribution of dominant drivers to predicted nitrogen fertilizer intensity and indicates which drivers were designated as perturbable in scenario construction. See Methods: Model attribution and global driver scores, Driver consolidation and perturbability rules, and Percentile mapping and SHAP-guided constrained scenario optimisation.

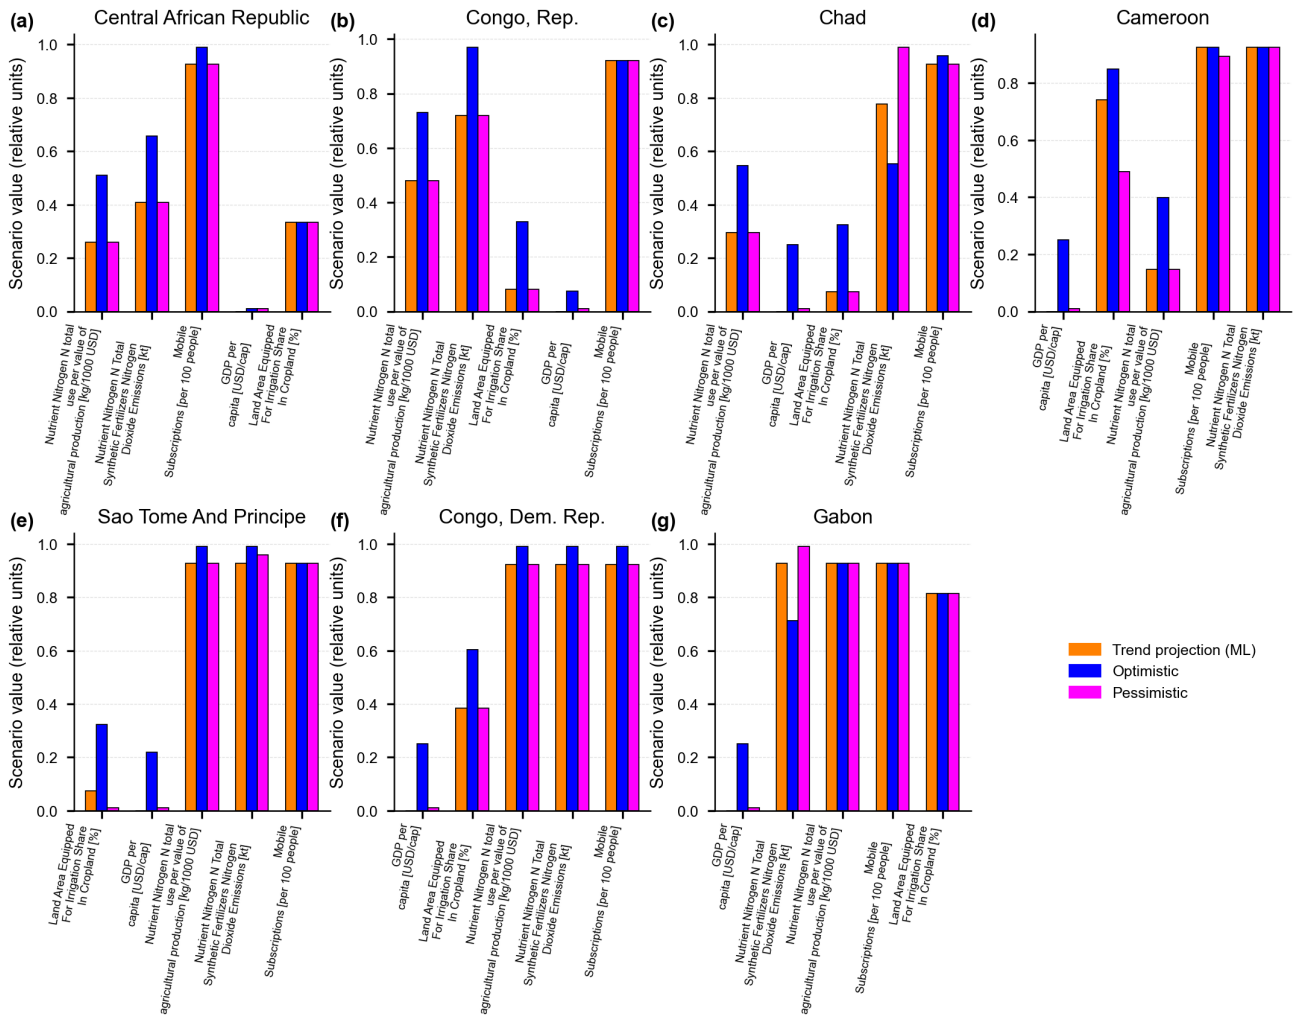

**Supplementary Fig. S19 | Regional SHAP driver portfolio and perturbable levers: Central Africa.** SHAP-based driver portfolio for the pruned regional model. The figure summarizes the relative contribution of dominant drivers to predicted nitrogen fertilizer intensity and indicates which drivers were designated as perturbable in scenario construction. See Methods: Model attribution and global driver scores, Driver consolidation and perturbability rules, and Percentile mapping and SHAP-guided constrained scenario optimisation.

■ Trend projection (ML)
 ■ Optimistic
 ■ Pessimistic

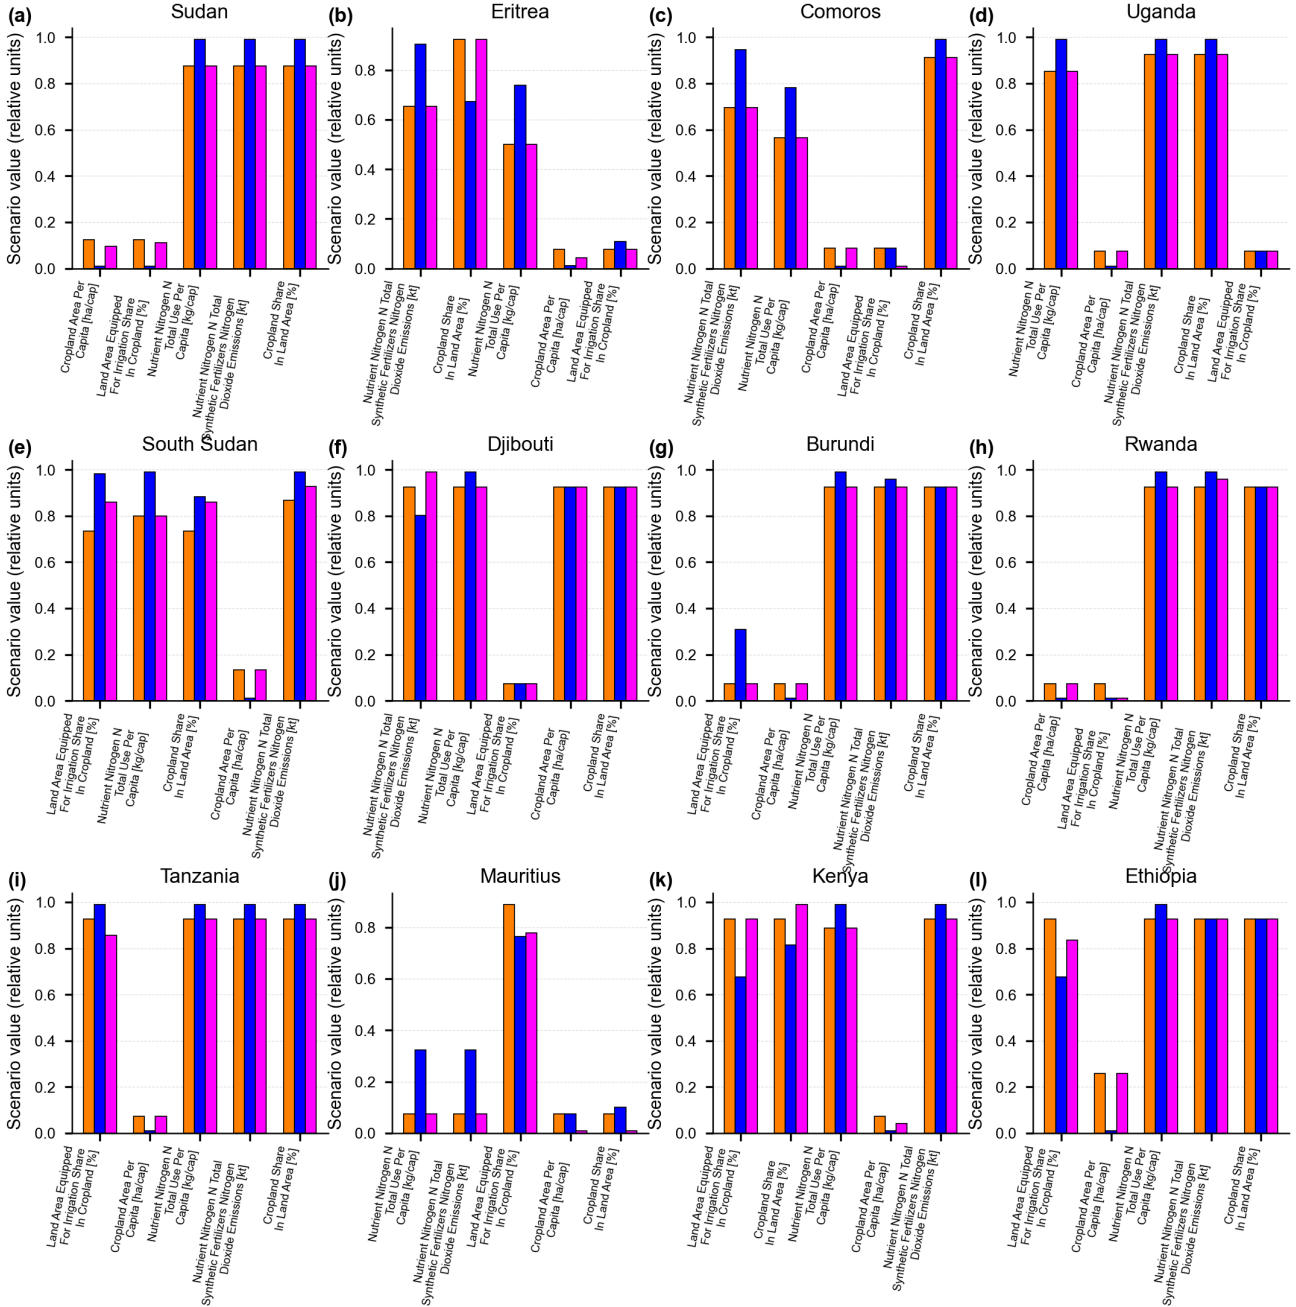

**Supplementary Fig. S20 | Regional SHAP driver portfolio and perturbable levers: East Africa.** SHAP-based driver portfolio for the pruned regional model. The figure summarizes the relative contribution of dominant drivers to predicted nitrogen fertilizer intensity and indicates which drivers were designated as perturbable in scenario construction. See Methods: Model attribution and global driver scores, Driver consolidation and perturbability rules, and Percentile mapping and SHAP-guided constrained scenario optimisation.

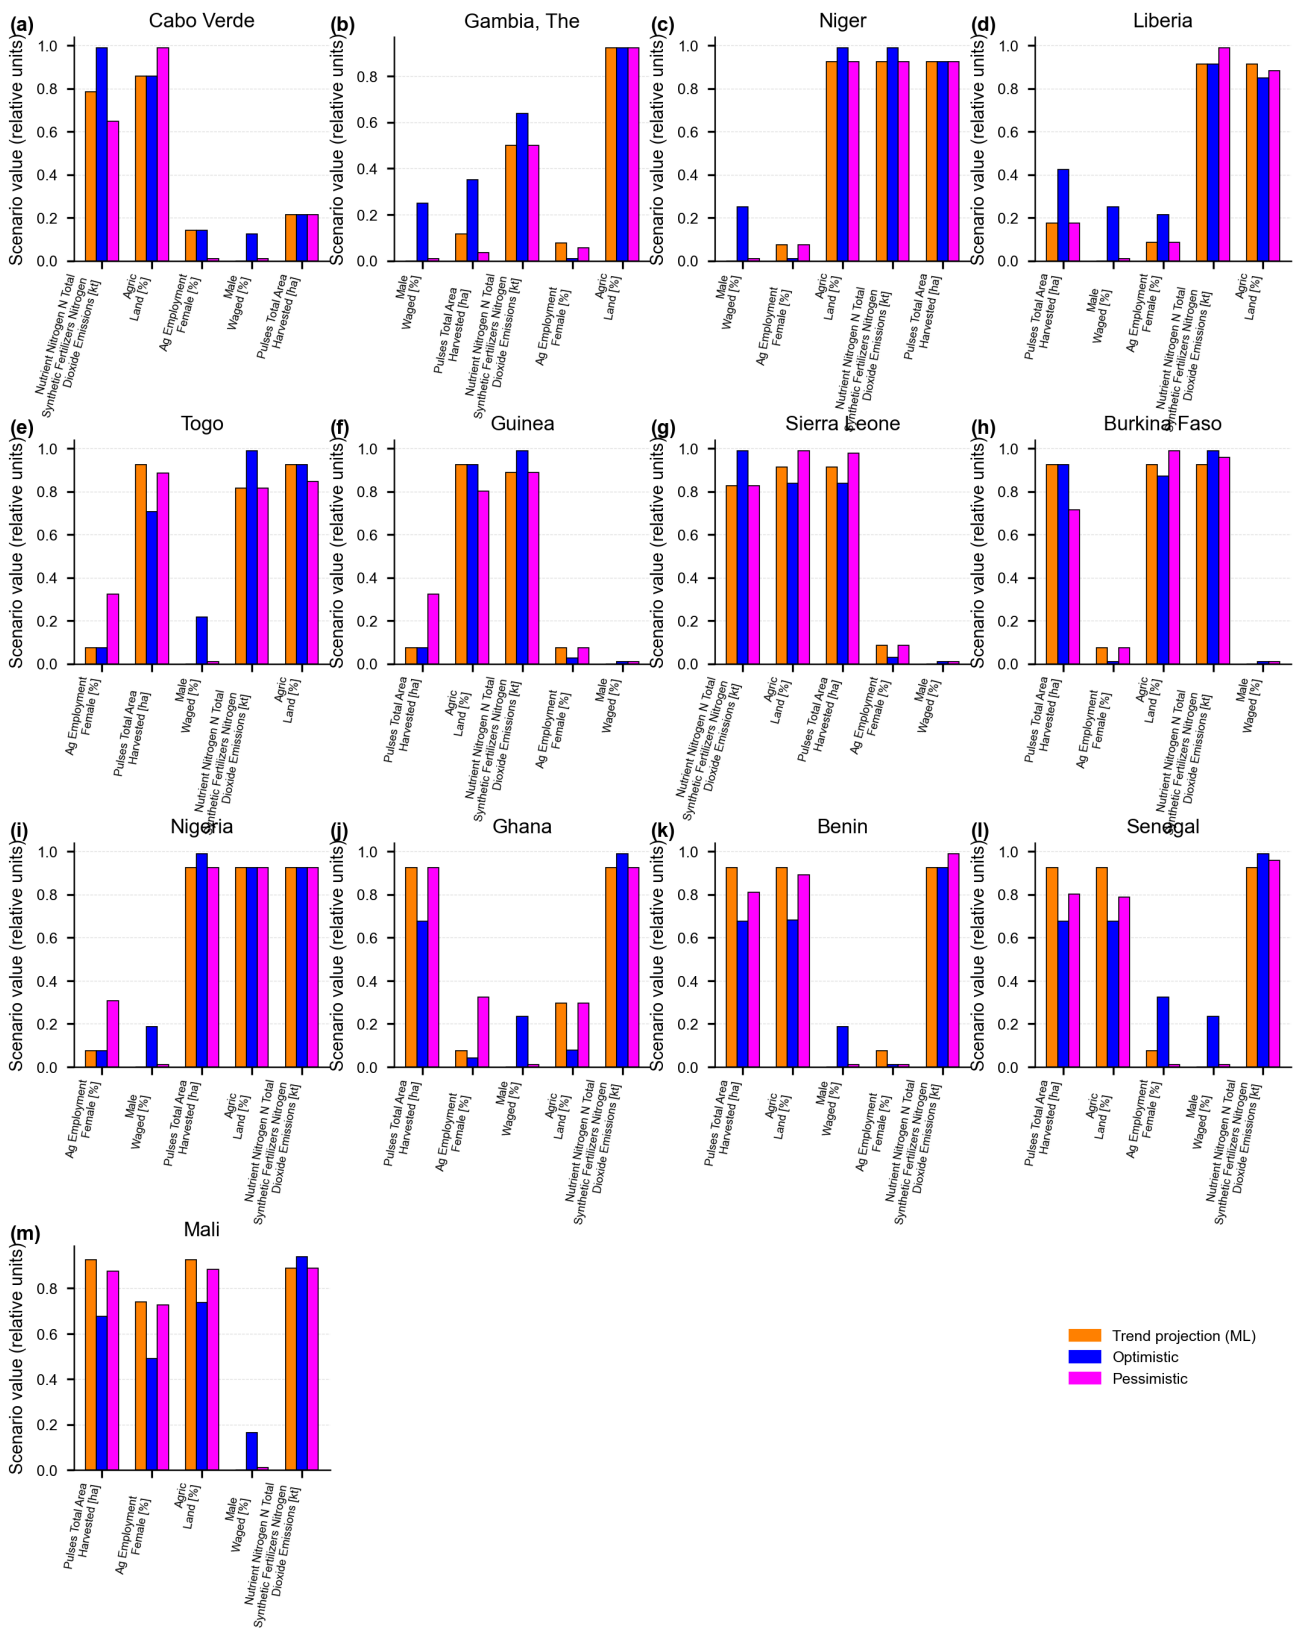

**Supplementary Fig. S21 | Regional SHAP driver portfolio and perturbable levers: West Africa.** SHAP-based driver portfolio for the pruned regional model. The figure summarizes the relative contribution of dominant drivers to predicted nitrogen fertilizer intensity and indicates which drivers were designated as perturbable in scenario construction. See Methods: Model attribution and global driver scores, Driver consolidation and perturbability rules, and Percentile mapping and SHAP-guided constrained scenario optimisation.

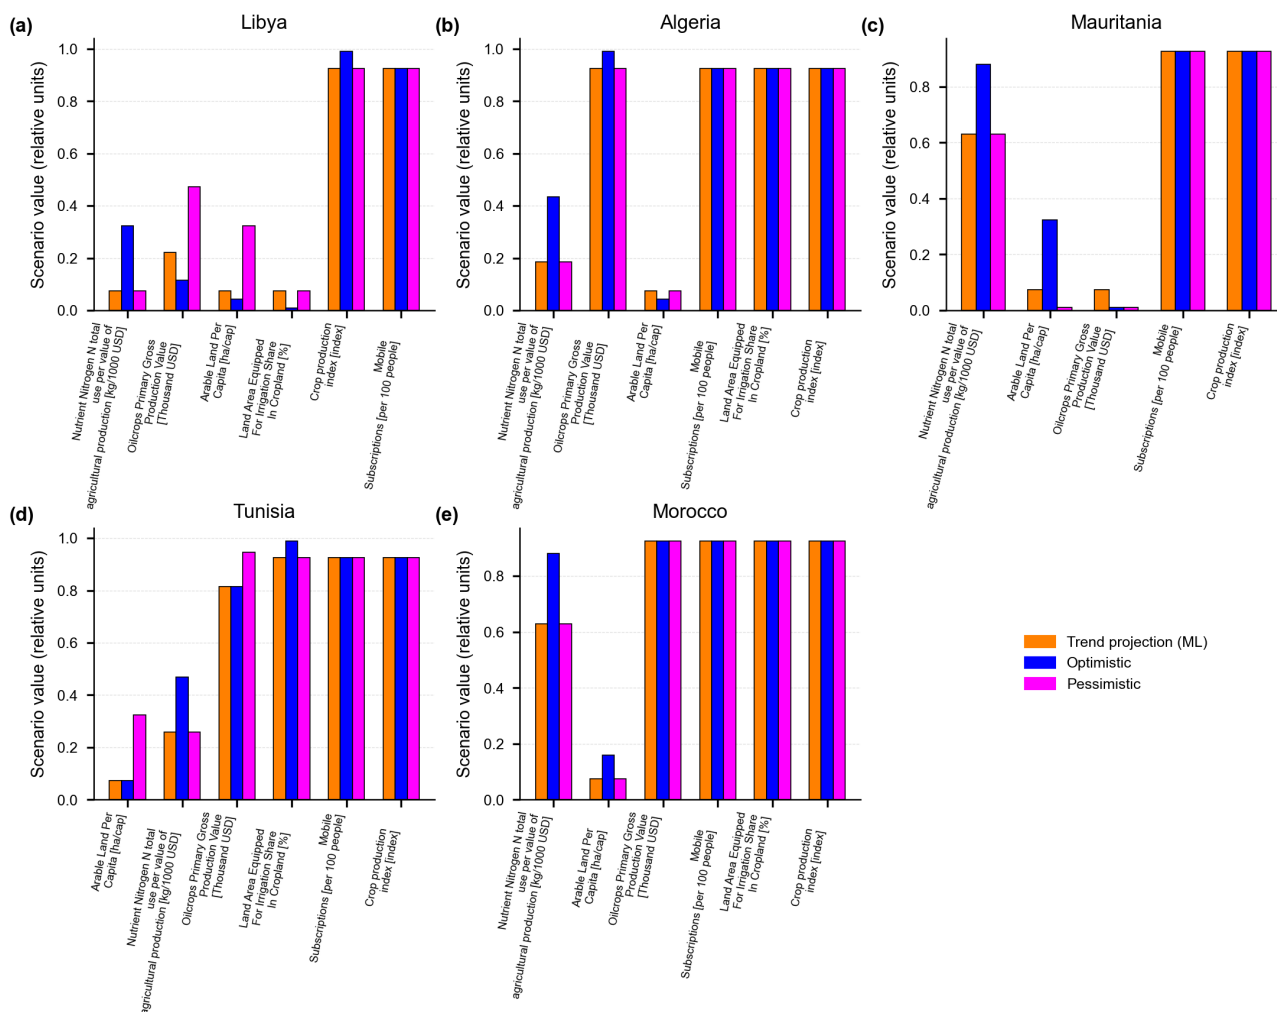

**Supplementary Fig. S22 | Regional SHAP driver portfolio and perturbable levers: North Africa.** SHAP-based driver portfolio for the pruned regional model. The figure summarizes the relative contribution of dominant drivers to predicted nitrogen fertilizer intensity and indicates which drivers were designated as perturbable in scenario construction. See Methods: Model attribution and global driver scores, Driver consolidation and perturbability rules, and Percentile mapping and SHAP-guided constrained scenario optimisation.

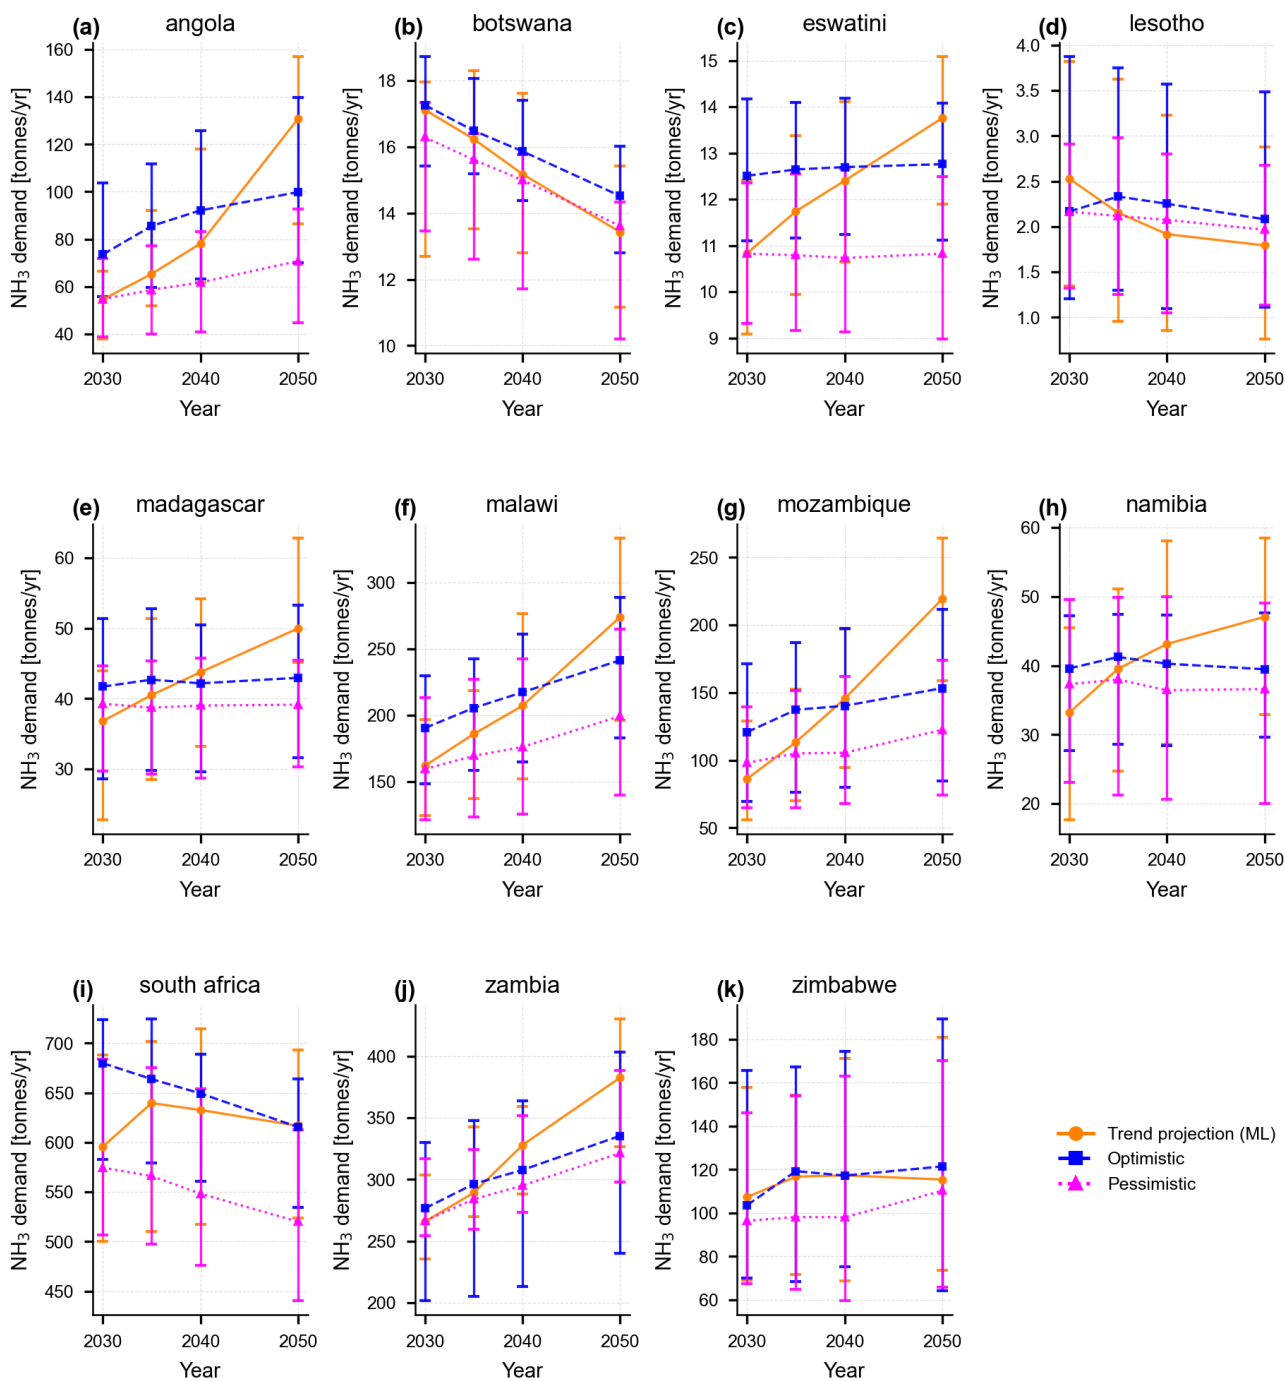

**Supplementary Fig. S23 | Ammonia-equivalent demand implied by fertilizer-intensity scenarios: Southern Africa.** Ammonia-equivalent totals (NH<sub>3</sub>) implied by fertilizer-intensity scenario trajectories after scaling by national cropland area and applying the molecular-weight conversion from N to NH<sub>3</sub>. Totals are shown for BAU, optimistic, and pessimistic scenarios. Uncertainty bands summarize uncertainty propagated from bootstrap model ensembles through the intensity-to-total conversion. See Methods: Equitable-diet cap, totals and ammonia translation and Uncertainty quantification and scenario robustness.

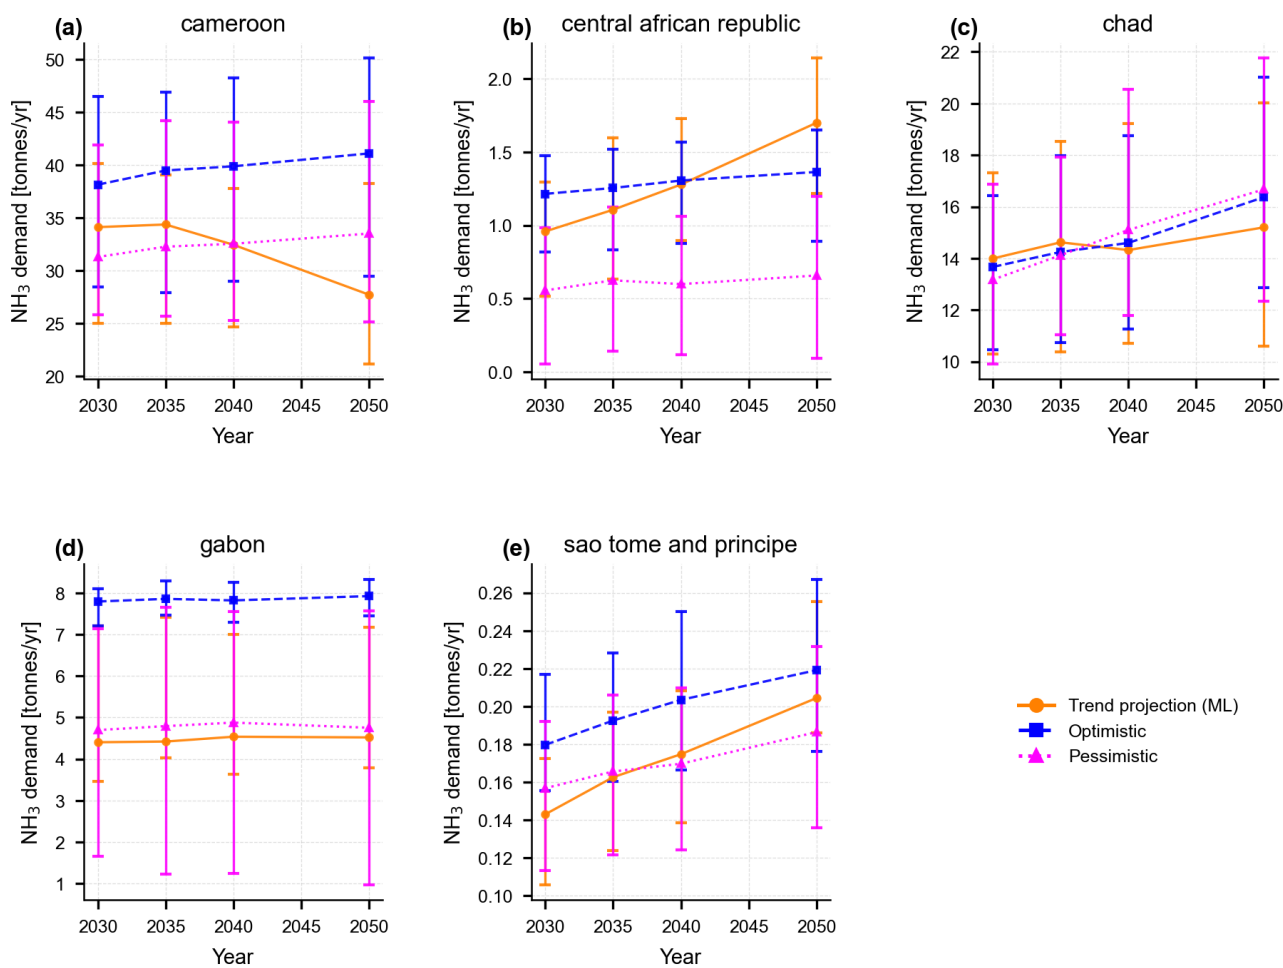

**Supplementary Fig. S24 | Ammonia-equivalent demand implied by fertilizer-intensity scenarios: Central Africa.** Ammonia-equivalent totals (NH<sub>3</sub>) implied by fertilizer-intensity scenario trajectories after scaling by national cropland area and applying the molecular-weight conversion from N to NH<sub>3</sub>. Totals are shown for BAU, optimistic, and pessimistic scenarios. Uncertainty bands summarize uncertainty propagated from bootstrap model ensembles through the intensity-to-total conversion. See Methods: Equitable-diet cap, totals and ammonia translation and Uncertainty quantification and scenario robustness.

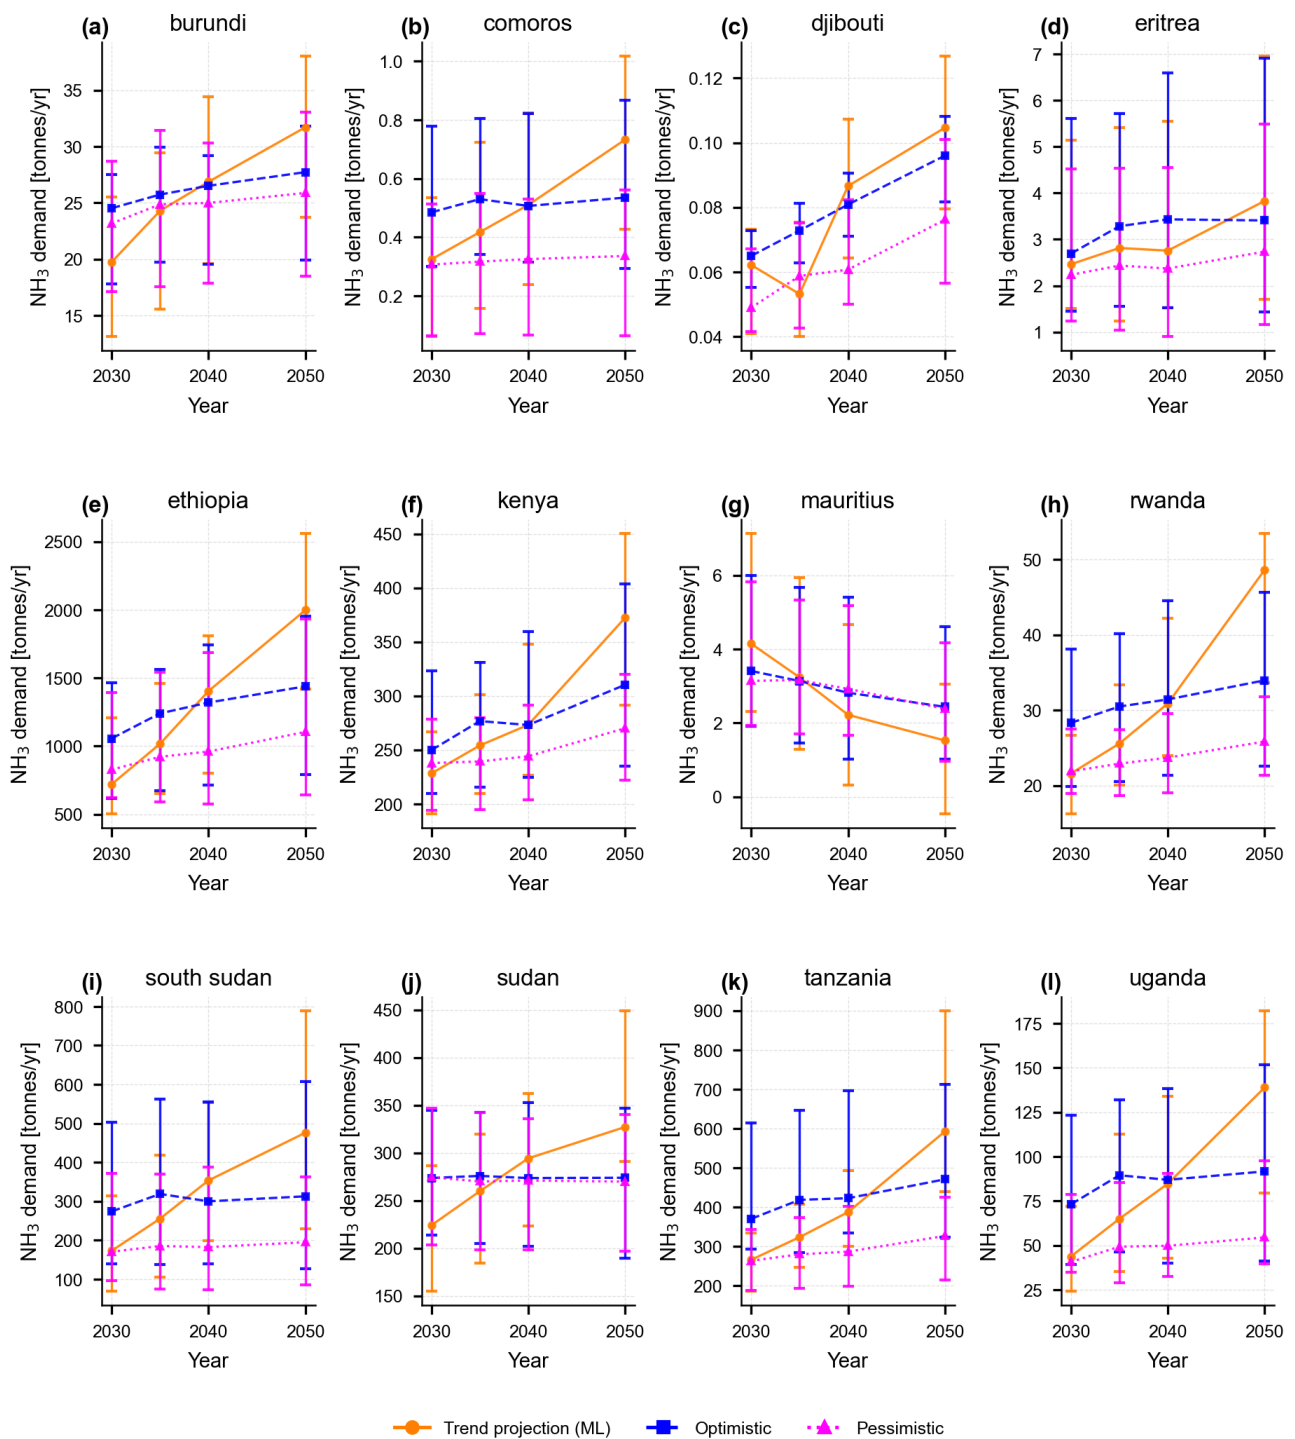

**Supplementary Fig. S25 | Ammonia-equivalent demand implied by fertilizer-intensity scenarios: East Africa.** Ammonia-equivalent totals ( $\text{NH}_3$ ) implied by fertilizer-intensity scenario trajectories after scaling by national cropland area and applying the molecular-weight conversion from N to  $\text{NH}_3$ . Totals are shown for BAU, optimistic, and pessimistic scenarios. Uncertainty bands summarize uncertainty propagated from bootstrap model ensembles through the intensity-to-total conversion. See Methods: Equitable-diet cap, totals and ammonia translation and Uncertainty quantification and scenario robustness.

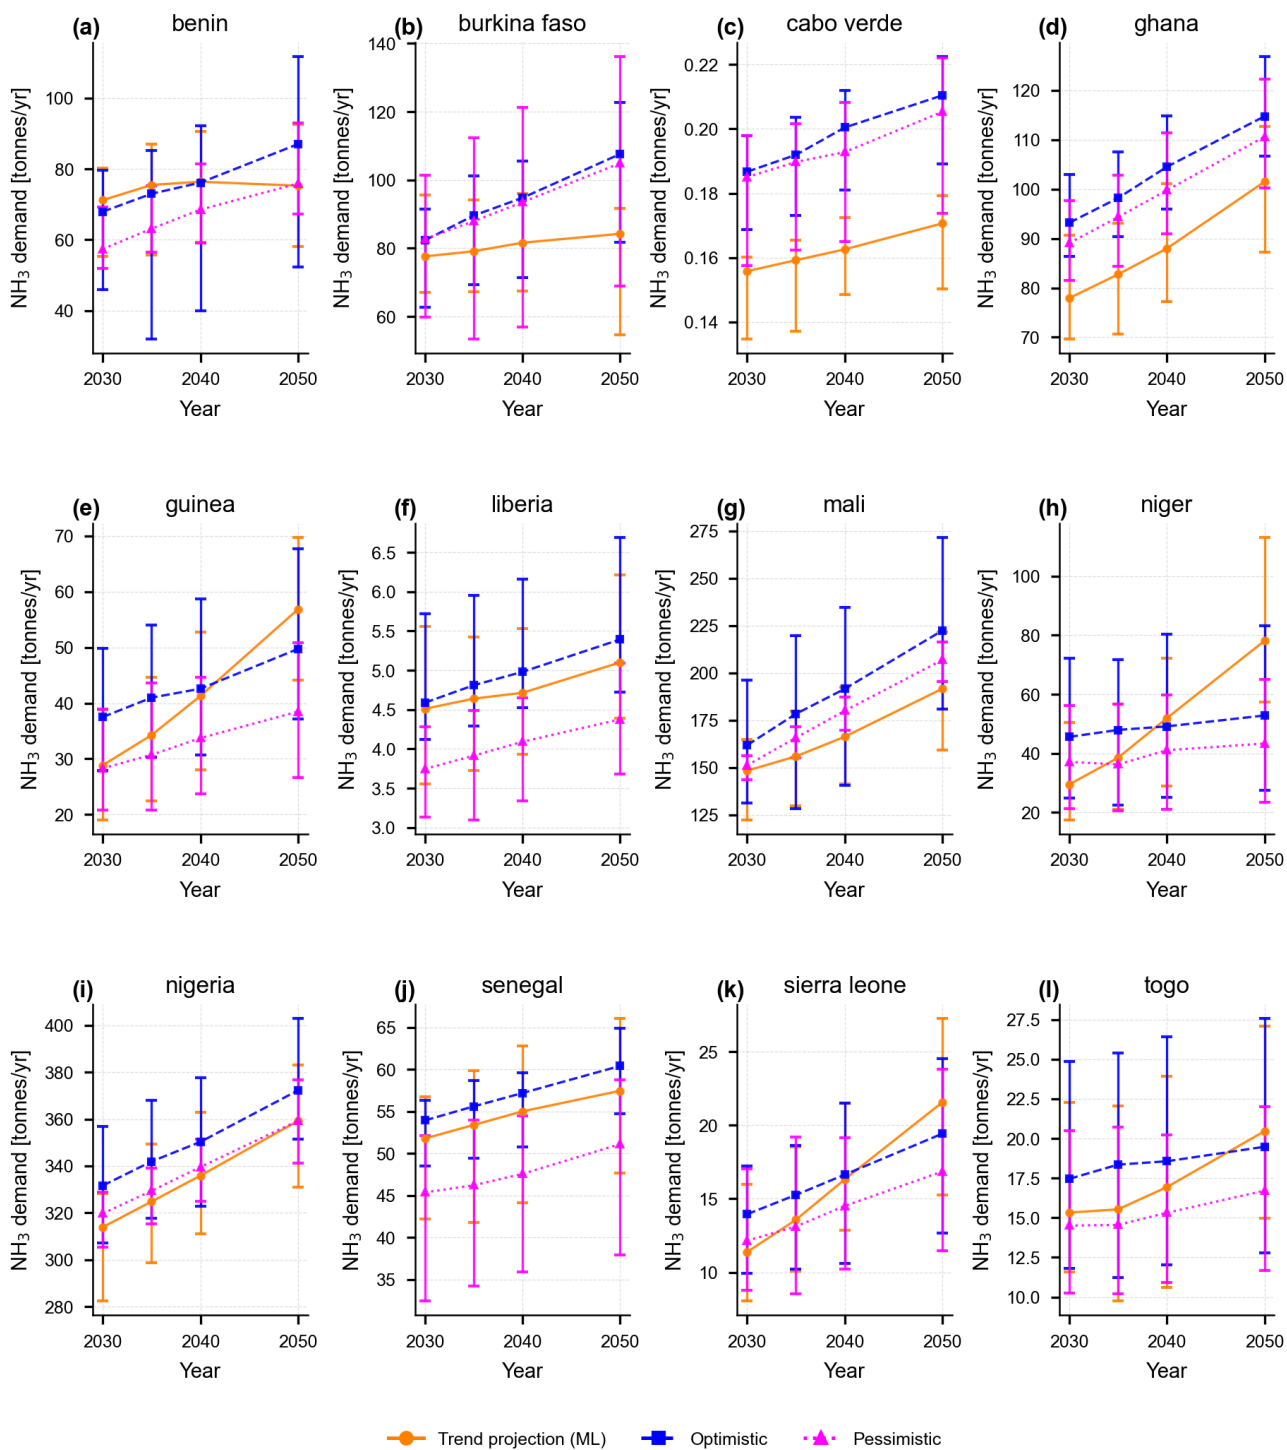

**Supplementary Fig. S26 | Ammonia-equivalent demand implied by fertilizer-intensity scenarios: West Africa.** Ammonia-equivalent totals ( $\text{NH}_3$ ) implied by fertilizer-intensity scenario trajectories after scaling by national cropland area and applying the molecular-weight conversion from N to  $\text{NH}_3$ . Totals are shown for BAU, optimistic, and pessimistic scenarios. Uncertainty bands summarize uncertainty propagated from bootstrap model ensembles through the intensity-to-total conversion. See Methods: Equitable-diet cap, totals and ammonia translation and Uncertainty quantification and scenario robustness.

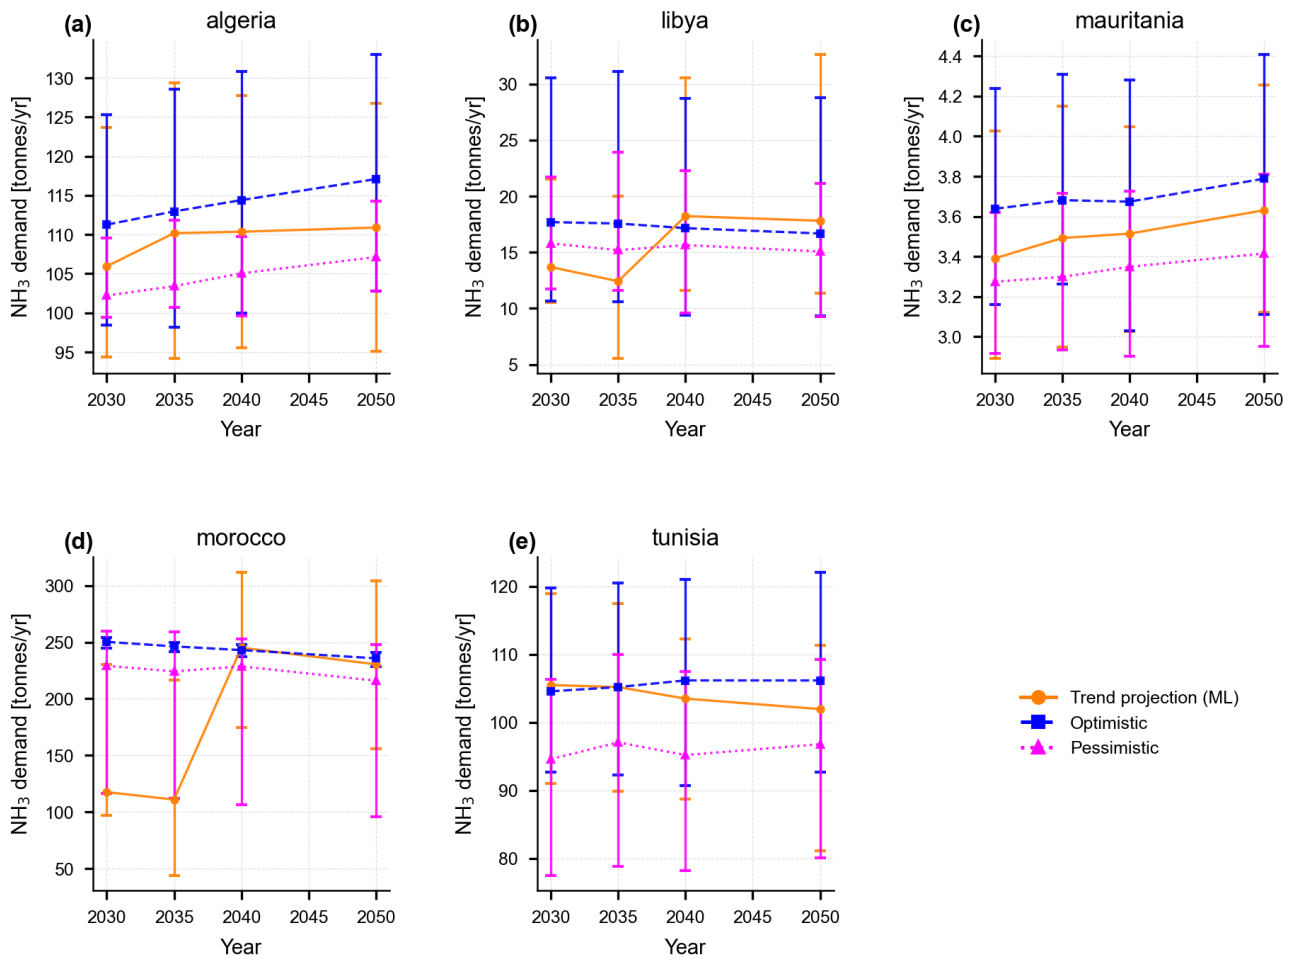

**Supplementary Fig. S27 | Ammonia-equivalent demand implied by fertilizer-intensity scenarios: North Africa.** Ammonia-equivalent totals ( $\text{NH}_3$ ) implied by fertilizer-intensity scenario trajectories after scaling by national cropland area and applying the molecular-weight conversion from N to  $\text{NH}_3$ . Totals are shown for BAU, optimistic, and pessimistic scenarios. Uncertainty bands summarize uncertainty propagated from bootstrap model ensembles through the intensity-to-total conversion. See Methods: Equitable-diet cap, totals and ammonia translation and Uncertainty quantification and scenario robustness.

## Supplementary Tables

**Supplementary Table 1 | Data harmonization, inclusion, and preprocessing rules.** Rules applied prior to model training.

| Rule                                 | Implementation setting                                                    |
|--------------------------------------|---------------------------------------------------------------------------|
| Yearwindowretained                   | YEAR_MIN=1990, YEAR_MAX=2022                                              |
| Coveragefilter                       | COVERAGE_THRESHOLD=50                                                     |
| Minimumcompletenessforcountry-series | MIN_COMPLETE_RATIO=0.7                                                    |
| Interpolationofnumericfeatures       | INTERP_METHOD=linear                                                      |
| Varianceandcollinearitypruning       | LOW_VARIANCE_TOPFRACTION=0.98;HIGH_CORR_THRESHOLD=0.98;VIF_THRESHOLD=10.0 |
| Train/testsplit                      | TRAIN_FRACTION=0.7;RANDOM_STATE=42                                        |

**Supplementary Table 2 | Regional training metadata.** For each region: number of countries, years included, observations, train/test split, and cross-validation design applied prior to training.

| Region          | Countries | Years     | Obs. | Train/Test | Cross-validation (CV)                                           |
|-----------------|-----------|-----------|------|------------|-----------------------------------------------------------------|
| Central Africa  | 7         | 1990-2022 | 205  | 143/62     | 5-fold KFold; shuffle=True; random_state=42; train_fraction=0.7 |
| East Africa     | 12        | 1990-2022 | 345  | 241/104    | 5-fold KFold; shuffle=True; random_state=42; train_fraction=0.7 |
| North Africa    | 5         | 1990-2022 | 165  | 115/50     | 5-fold KFold; shuffle=True; random_state=42; train_fraction=0.7 |
| Southern Africa | 11        | 1990-2022 | 343  | 240/103    | 5-fold KFold; shuffle=True; random_state=42; train_fraction=0.7 |
| West Africa     | 14        | 1990-2022 | 440  | 308/132    | 5-fold KFold; shuffle=True; random_state=42; train_fraction=0.7 |

**Supplementary Table 3 | Countries by region.** Countries that met data harmonization, inclusion, and preprocessing rules in Supplementary Table 1.

| Region          | Country                  | Inclusion | Avg decade cov (%) | Target non-null | Mean row completeness |
|-----------------|--------------------------|-----------|--------------------|-----------------|-----------------------|
| Central Africa  | Cameroon                 | Yes       | 95.83              | 1.00            | 0.97                  |
| Central Africa  | Central African Republic | Yes       | 89.18              | 1.00            | 0.95                  |
| Central Africa  | Chad                     | Yes       | 91.40              | 1.00            | 0.96                  |
| Central Africa  | Congo, Dem. Rep.         | Yes       | 88.50              | 0.97            | 0.96                  |
| Central Africa  | Congo, Rep.              | Yes       | 83.10              | 1.00            | 0.95                  |
| Central Africa  | Gabon                    | Yes       | 68.35              | 1.00            | 0.92                  |
| Central Africa  | Sao Tome and Principe    | Yes       | 47.25              | 0.64            | 0.79                  |
| East Africa     | Burundi                  | Yes       | 92.78              | 1.00            | 0.96                  |
| East Africa     | Comoros                  | Yes       | 72.00              | 0.97            | 0.94                  |
| East Africa     | Djibouti                 | Yes       | 50.35              | 0.64            | 0.85                  |
| East Africa     | Eritrea                  | Yes       | 76.60              | 1.00            | 0.95                  |
| East Africa     | Ethiopia                 | Yes       | 94.28              | 1.00            | 0.94                  |
| East Africa     | Kenya                    | Yes       | 95.75              | 1.00            | 0.97                  |
| East Africa     | Mauritius                | Yes       | 74.78              | 1.00            | 0.87                  |
| East Africa     | Rwanda                   | Yes       | 92.40              | 0.94            | 0.96                  |
| East Africa     | South Sudan              | Yes       | 37.95              | 1.00            | 0.90                  |
| East Africa     | Sudan                    | Yes       | 61.17              | 1.00            | 0.84                  |
| East Africa     | Tanzania                 | Yes       | 96.20              | 1.00            | 0.97                  |
| East Africa     | Uganda                   | Yes       | 87.25              | 1.00            | 0.97                  |
| North Africa    | Algeria                  | Yes       | 84.40              | 1.00            | 0.97                  |
| North Africa    | Libya                    | Yes       | 65.30              | 1.00            | 0.97                  |
| North Africa    | Mauritania               | Yes       | 85.47              | 0.97            | 0.97                  |
| North Africa    | Morocco                  | Yes       | 96.23              | 1.00            | 0.97                  |
| North Africa    | Tunisia                  | Yes       | 68.08              | 1.00            | 0.90                  |
| Southern Africa | Angola                   | Yes       | 89.38              | 0.97            | 0.96                  |
| Southern Africa | Botswana                 | Yes       | 77.00              | 1.00            | 0.95                  |
| Southern Africa | Eswatini                 | Yes       | 83.38              | 1.00            | 0.95                  |
| Southern Africa | Lesotho                  | Yes       | 64.83              | 1.00            | 0.93                  |
| Southern Africa | Madagascar               | Yes       | 89.72              | 1.00            | 0.97                  |
| Southern Africa | Malawi                   | Yes       | 90.30              | 1.00            | 0.94                  |
| Southern Africa | Mozambique               | Yes       | 96.17              | 1.00            | 0.97                  |
| Southern Africa | Namibia                  | Yes       | 78.53              | 0.76            | 0.95                  |
| Southern Africa | South Africa             | Yes       | 93.25              | 1.00            | 0.97                  |
| Southern Africa | Zambia                   | Yes       | 90.80              | 1.00            | 0.93                  |
| Southern Africa | Zimbabwe                 | Yes       | 94.85              | 1.00            | 0.97                  |
| West Africa     | Benin                    | Yes       | 93.80              | 1.00            | 0.94                  |
| West Africa     | Burkina Faso             | Yes       | 95.05              | 1.00            | 0.95                  |
| West Africa     | Cabo Verde               | Yes       | 70.65              | 0.65            | 0.90                  |
| West Africa     | Gambia, The              | Yes       | 81.23              | 1.00            | 0.92                  |
| West Africa     | Ghana                    | Yes       | 88.20              | 1.00            | 0.92                  |
| West Africa     | Guinea                   | Yes       | 91.83              | 1.00            | 0.94                  |
| West Africa     | Guinea-Bissau            | Yes       | 79.93              | 1.00            | 0.91                  |
| West Africa     | Liberia                  | Yes       | 57.03              | 0.62            | 0.79                  |
| West Africa     | Mali                     | Yes       | 95.83              | 1.00            | 0.97                  |
| West Africa     | Niger                    | Yes       | 96.25              | 1.00            | 0.97                  |
| West Africa     | Nigeria                  | Yes       | 95.18              | 1.00            | 0.95                  |
| West Africa     | Senegal                  | Yes       | 92.60              | 0.97            | 0.94                  |
| West Africa     | Sierra Leone             | Yes       | 87.12              | 1.00            | 0.92                  |
| West Africa     | Togo                     | Yes       | 83.82              | 1.00            | 0.92                  |

**Supplementary Table 4 | Feature sets used for initial regional training splits (baseline, pre-pruning).**

| Region          | Feature label                                                      | Unit           | Data source |
|-----------------|--------------------------------------------------------------------|----------------|-------------|
| Central Africa  | Agricultural Land Share In Land Area                               | %              | [1]         |
| Central Africa  | Arable Land                                                        | %              | [2]         |
| Central Africa  | Cereals Primary Area Harvested                                     | ha             | [1]         |
| Central Africa  | Crop production index                                              | index          | [2]         |
| Central Africa  | Cropland Area Per Capita                                           | ha/cap         | [1]         |
| Central Africa  | GDP per capita                                                     | USD/cap        | [2]         |
| Central Africa  | Land Area Equipped For Irrigation Share In Cropland                | %              | [1]         |
| Central Africa  | Livestock production index                                         | index          | [2]         |
| Central Africa  | Maize Corn Yield                                                   | t/ha           | [1]         |
| Central Africa  | Mobile Subscriptions                                               | per 100 people | [2]         |
| Central Africa  | Nutrient Nitrogen N Total Synthetic Fertilizers Emissions N2O      | kt             | [1]         |
| Central Africa  | Nutrient Nitrogen N Total Use Per Area Of Cropland                 | kg/ha          | [1]         |
| Central Africa  | Nutrient Nitrogen N total use per value of agricultural production | kg/1000 USD    | [1]         |
| Central Africa  | Population Growth                                                  | %              | [2]         |
| Central Africa  | Temperature Change                                                 | °C             | [1]         |
| Central Africa  | Unemployment Male                                                  | %              | [2]         |
| East Africa     | Agricultural Land Share In Land Area                               | %              | [1]         |
| East Africa     | Cereals Primary Area Harvested                                     | ha             | [1]         |
| East Africa     | Cereals Primary Yield                                              | kg/ha          | [1]         |
| East Africa     | Cropland Area Per Capita                                           | ha/cap         | [1]         |
| East Africa     | Cropland Share In Land Area                                        | %              | [1]         |
| East Africa     | Forest Land Share In Land Area                                     | %              | [1]         |
| East Africa     | Land Area Equipped For Irrigation Share In Cropland                | %              | [1]         |
| East Africa     | Maize Corn Area Harvested                                          | ha             | [1]         |
| East Africa     | Nutrient Nitrogen N Total Synthetic Fertilizers Emissions N2O      | kt             | [1]         |
| East Africa     | Nutrient Nitrogen N Total Use Per Area Of Cropland                 | kg/ha          | [1]         |
| East Africa     | Nutrient Nitrogen N Total Use Per Capita                           | kg/cap         | [1]         |
| East Africa     | Planted Forest Area                                                | 1000 ha        | [1]         |
| North Africa    | Arable Land Per Capita                                             | ha/cap         | [2]         |
| North Africa    | Cereal Yield                                                       | t/ha           | [2]         |
| North Africa    | Crop production index                                              | index          | [2]         |
| North Africa    | GDP per capita                                                     | USD/cap        | [2]         |
| North Africa    | Hh Consumption GDP                                                 | %              | [2]         |
| North Africa    | Land Area Equipped For Irrigation Share In Cropland                | %              | [1]         |
| North Africa    | Mobile Subscriptions                                               | per 100 people | [2]         |
| North Africa    | Nutrient Nitrogen N Total Use Per Area Of Cropland                 | kg/ha          | [1]         |
| North Africa    | Nutrient Nitrogen N total use per value of agricultural production | kg/1000 USD    | [1]         |
| North Africa    | Oilcrops Primary Gross Production Value                            | Thousand USD   | [1]         |
| North Africa    | Population Growth                                                  | %              | [2]         |
| North Africa    | Potatoes Area Harvested                                            | ha             | [1]         |
| North Africa    | Pulses Total Production                                            | ton            | [1]         |
| North Africa    | Pulses Total Yield                                                 | kg/ha          | [1]         |
| North Africa    | Temperature Change                                                 | °C             | [1]         |
| North Africa    | Unemployment Male                                                  | %              | [2]         |
| Southern Africa | Arable Land Per Capita                                             | ha/cap         | [2]         |
| Southern Africa | Crop production index                                              | index          | [2]         |
| Southern Africa | Cropland Share In Land Area                                        | %              | [1]         |
| Southern Africa | Forest Land Area                                                   | 1000 ha        | [1]         |
| Southern Africa | GDP per capita                                                     | USD/cap        | [2]         |

**Continued in SuppFig. S28**

**Supplementary Table 5 | CatBoost hyperparameters for each regional model (pre-pruning baseline).** Best hyperparameters selected by cross-validated optimization.

| Region          | bootstrap_type   | bag_temp. | subsample depth | iter. | learn_rate | l2_reg    | seed    | early_stop |
|-----------------|------------------|-----------|-----------------|-------|------------|-----------|---------|------------|
| Central Africa  | <b>Bernoulli</b> | —         | 0.726069        | 4     | 1000       | 0.0624687 | 9.59902 | 42 200     |
| East Africa     | <b>Bayesian</b>  | 1.45387   | —               | 4     | 1000       | 0.0749453 | 9.4131  | 42 200     |
| North Africa    | <b>Bayesian</b>  | 0.250153  | —               | 4     | 1000       | 0.0295899 | 3.11024 | 42 200     |
| Southern Africa | <b>Bernoulli</b> | —         | 0.791718        | 4     | 1000       | 0.0216928 | 1.0022  | 42 200     |
| West Africa     | <b>Bernoulli</b> | —         | 0.980554        | 4     | 1000       | 0.0972164 | 7.7892  | 42 200     |

**Supplementary Table 6 | CatBoost hyperparameters for each regional model (post-pruning).** For each region, the pruning method with the smallest test RMSE was selected as the best method.

| Region          | Pruning           | RMSE   | bootstrap_type   | subsample depth | iter. | learn_rate | l2_reg    | seed    | early_stop |
|-----------------|-------------------|--------|------------------|-----------------|-------|------------|-----------|---------|------------|
| Central Africa  | <b>SHAPGreedy</b> | 0.2072 | <b>Bernoulli</b> | 0.928433        | 6     | 1000       | 0.0321968 | 1.00072 | 42 200     |
| East Africa     | <b>BPSO+SHAP</b>  | 2.1375 | <b>Bayesian</b>  | —               | 4     | 1000       | 0.0506059 | 2.45156 | 42 200     |
| North Africa    | <b>BPSO</b>       | 1.1549 | <b>MVS</b>       | —               | 4     | 1000       | 0.0602065 | 1.64213 | 42 200     |
| Southern Africa | <b>BPSO+SHAP</b>  | 1.5499 | <b>Bernoulli</b> | 0.68094         | 4     | 1000       | 0.0397461 | 1.04262 | 42 200     |
| West Africa     | <b>BPSO</b>       | 1.0502 | <b>Bernoulli</b> | 0.91215         | 7     | 1000       | 0.0809735 | 2.15675 | 42 200     |

**Supplementary Table 7 | Feature pruning and search configuration parameters.** Parameters used for SHAP-based pruning techniques.

| Pruning method | Parameter                | Value |
|----------------|--------------------------|-------|
| BPSO           | generations              | 100   |
| BPSO           | min_features             | 5     |
| BPSO           | inertia                  | 0.7   |
| BPSO           | c1                       | 1.5   |
| BPSO           | c2                       | 1.5   |
| BPSO           | mutation_rate            | 0.02  |
| BPSO           | random_state             | None  |
| BPSO+SHAP      | generations              | 100   |
| BPSO+SHAP      | min_features             | 5     |
| BPSO+SHAP      | inertia                  | 0.7   |
| BPSO+SHAP      | c1                       | 1.5   |
| BPSO+SHAP      | c2                       | 1.5   |
| BPSO+SHAP      | mutation_rate            | 0.02  |
| BPSO+SHAP      | use_shap                 | True  |
| BPSO+SHAP      | shap_min_prob            | 0.1   |
| BPSO+SHAP      | shap_max_prob            | 0.9   |
| BPSO+SHAP      | lambda_shap              | 0.1   |
| SHAP           | min_features             | 5     |
| SHAPGreedy     | max_iter                 | 100   |
| SHAPGreedy     | drop_per_iter            | 1     |
| SHAPGreedy     | patience                 | 20    |
| SHAPGreedy     | min_features             | 5     |
| SHAPGreedy     | pre_prune_top            | 30    |
| SHAPStochastic | max_iter                 | 100   |
| SHAPStochastic | drop_per_iter            | 1     |
| SHAPStochastic | drop_candidate_pool_size | 3     |
| SHAPStochastic | patience                 | 20    |
| SHAPStochastic | min_features             | 5     |
| SHAPStochastic | pre_prune_top            | 30    |
| SHAPStochastic | random_state             | None  |

**Supplementary Table 8 | Post-pruning features (all regions and methods).**

| Region         | Pruning method | Feature label                                                              | Unit           |
|----------------|----------------|----------------------------------------------------------------------------|----------------|
| Central Africa | BPSO           | Cereals Primary Area Harvested                                             | ha             |
| Central Africa | BPSO           | Crop production index                                                      | index          |
| Central Africa | BPSO           | Cropland Area Per Capita                                                   | ha/cap         |
| Central Africa | BPSO           | Land Area Equipped For Irrigation Share In Cropland                        | %              |
| Central Africa | BPSO           | Maize Corn Yield                                                           | t/ha           |
| Central Africa | BPSO           | Mobile Subscriptions                                                       | per 100 people |
| Central Africa | BPSO           | Nutrient Nitrogen N Total Synthetic Fertilizers Nitrogen Dioxide Emissions | kt             |
| Central Africa | BPSO           | Nutrient Nitrogen N total use per value of agricultural production         | kg/1000 USD    |
| Central Africa | BPSO           | Temperature Change                                                         | degC           |
| Central Africa | BPSO           | Unemployment Male                                                          | %              |
| Central Africa | SHAPGreedy     | GDP per capita                                                             | USD/cap        |
| Central Africa | SHAPGreedy     | Land Area Equipped For Irrigation Share In Cropland                        | %              |
| Central Africa | SHAPGreedy     | Nutrient Nitrogen N Total Use Per Capita                                   | kg/cap         |
| Central Africa | SHAPGreedy     | Nutrient Nitrogen N total use per value of agricultural production         | kg/1000 USD    |
| Central Africa | SHAPGreedy     | Temperature Change                                                         | degC           |
| Central Africa | SHAP           | Agricultural Land Share In Land Area                                       | %              |
| Central Africa | SHAP           | Arable Land                                                                | %              |
| Central Africa | SHAP           | Arable Land Per Capita                                                     | ha/cap         |
| Central Africa | SHAP           | Cereals Primary Area Harvested                                             | ha             |
| Central Africa | SHAP           | Crop production index                                                      | index          |
| Central Africa | SHAP           | Cropland Area Per Capita                                                   | ha/cap         |
| Central Africa | SHAP           | GDP per capita                                                             | USD/cap        |
| Central Africa | SHAP           | Land Area Equipped For Irrigation Share In Cropland                        | %              |
| Central Africa | SHAP           | Mobile Subscriptions                                                       | per 100 people |
| Central Africa | SHAP           | Nutrient Nitrogen N Total Synthetic Fertilizers Nitrogen Dioxide Emissions | kt             |
| Central Africa | SHAP           | Nutrient Nitrogen N Total Use Per Capita                                   | kg/cap         |
| Central Africa | SHAP           | Nutrient Nitrogen N total use per value of agricultural production         | kg/1000 USD    |
| Central Africa | SHAPStochastic | GDP per capita                                                             | USD/cap        |
| Central Africa | SHAPStochastic | Land Area Equipped For Irrigation Share In Cropland                        | %              |
| Central Africa | SHAPStochastic | Nutrient Nitrogen N Total Use Per Capita                                   | kg/cap         |
| Central Africa | SHAPStochastic | Nutrient Nitrogen N total use per value of agricultural production         | kg/1000 USD    |
| Central Africa | SHAPStochastic | Temperature Change                                                         | degC           |
| Central Africa | BPSO+SHAP      | Arable Land                                                                | %              |
| Central Africa | BPSO+SHAP      | Cereals Primary Area Harvested                                             | ha             |
| Central Africa | BPSO+SHAP      | Crop production index                                                      | index          |
| Central Africa | BPSO+SHAP      | Cropland Area Per Capita                                                   | ha/cap         |
| Central Africa | BPSO+SHAP      | Land Area Equipped For Irrigation Share In Cropland                        | %              |
| Central Africa | BPSO+SHAP      | Maize Corn Yield                                                           | t/ha           |
| Central Africa | BPSO+SHAP      | Mobile Subscriptions                                                       | per 100 people |
| Central Africa | BPSO+SHAP      | Nutrient Nitrogen N Total Synthetic Fertilizers Nitrogen Dioxide Emissions | kt             |
| Central Africa | BPSO+SHAP      | Nutrient Nitrogen N total use per value of agricultural production         | kg/1000 USD    |
| Central Africa | BPSO+SHAP      | Population Growth                                                          | %              |
| Central Africa | BPSO+SHAP      | Temperature Change                                                         | degC           |
| Central Africa | BPSO+SHAP      | Unemployment Male                                                          | %              |
| East Africa    | BPSO           | Agricultural Land Share In Land Area                                       | %              |
| East Africa    | BPSO           | Cropland Area Per Capita                                                   | ha/cap         |
| East Africa    | BPSO           | Forest Land Share In Land Area                                             | %              |
| East Africa    | BPSO           | Land Area Equipped For Irrigation Share In Cropland                        | %              |
| East Africa    | BPSO           | Nutrient Nitrogen N Total Synthetic Fertilizers Nitrogen Dioxide Emissions | kt             |

Continued in SuppFig. S29

**Supplementary Table 9 | Scenario search levers and uncertainty-quantification settings.** Scenario percentile bounds and perturbability rules, plus bootstrap and uncertainty safeguards.

| Section               | Parameter           | Value                                                                                                                                                                                                                        |
|-----------------------|---------------------|------------------------------------------------------------------------------------------------------------------------------------------------------------------------------------------------------------------------------|
| Scenariosearch        | q_low               | 0.01                                                                                                                                                                                                                         |
| Scenariosearch        | q_high              | 0.99                                                                                                                                                                                                                         |
| Scenariosearch        | max_pct_shift       | 0.25                                                                                                                                                                                                                         |
| Scenariosearch        | n_grid              | 41                                                                                                                                                                                                                           |
| Scenariosearch        | perturbability_rule | Non-perturbable when name tokens indicate population-like variables (tokens including <b>population</b> or prefixes <b>pop*</b> ) unemployment, or temperature. Tokens <b>urban</b> and <b>rural</b> are explicitly allowed. |
| Bootstrap/uncertainty | n_bootstrap         | 200                                                                                                                                                                                                                          |
| Bootstrap/uncertainty | seed_base           | 42                                                                                                                                                                                                                           |

## Supplementary Notes

### Feature pruning yields compact and robust regional models

To support credible long-term projections and scenario analysis, regional models must generalize well. Across regions, feature pruning produced more compact models and reduced out-of-sample error by 22–41% (Supplementary Fig. S1a). The largest gains occurred in East and Southern Africa (41% reduction in RMSE), with additional improvements in Central (37%), West (35%) and North Africa (24%) (Supplementary Tables 6–7).

Absolute test RMSE values and the selected post-pruning configurations are reported in Supplementary Table 6 (for example, Central Africa improves from 0.33 to 0.21 kg ha<sup>-1</sup> yr<sup>-1</sup>; East Africa from 3.60 to 2.14 kg ha<sup>-1</sup> yr<sup>-1</sup>; Southern Africa from 2.64 to 1.55 kg ha<sup>-1</sup> yr<sup>-1</sup>; North Africa from 1.53 to 1.16 kg ha<sup>-1</sup> yr<sup>-1</sup>; and West Africa from 1.61 to 1.05 kg ha<sup>-1</sup> yr<sup>-1</sup>).

Training–test comparisons show that optimization-based pruning (BPSO-only and SHAP-guided BPSO) improves test performance without widening the train–test gap (Supplementary Fig. S1b), whereas SHAP rank-based pruning can modestly degrade generalization in some settings (e.g., East Africa; Supplementary Fig. S2). This pattern is consistent with rank-based removal discarding stabilizing predictors under distribution shift, while optimization-based pruning searches directly for feature subsets that retain predictive accuracy under the evaluation protocol (see Methods). Country-level error extremes for the selected regional models are shown in Supplementary Fig. S2.

### Supplementary tables overview

Supplementary Tables S1–S9 provide implementation details for data harmonization, regional training configuration, pruning and scenario search settings, and uncertainty procedures referenced in the main-text Methods. Supplementary Figures provide additional diagnostics and regional decompositions.

## Supplementary References

- [1] Food and Agriculture Organization of the United Nations, *FAOSTAT Statistical Database*, 2025. [Online]. Available: <https://www.fao.org/faostat/>.
- [2] The World Bank, *World Bank Development Indicators*, 2025. [Online]. Available: <https://data.worldbank.org/indicator>.
