# Supplementary material
Source: Research Square preprint supplement (doi:10.21203/rs.3.rs-8870496/v1)
Supplement: Supplementary file 1 [file f22409a5cd8f927d1439aaf6.xlsx]

## Sheet: Fig. 1
sheet_label	Fig. 1
subplot	a						subplot	b					subplot	a_envelope
table	historical						table	delta_vs_BAU_optimistic					table	envelope
year	value_kg_n_per_ha						region	horizon_year	scenario	delta_vs_BAU_kg_n_per_ha			year	min_kg_n_per_ha	max_kg_n_per_ha
2000	5.75613						Central	2050	optimistic	-0.0479355			2030	8.53842	18.1567
2001	5.84087						East	2050	optimistic	-7.50131			2035	8.85152	18.2323
2002	6.88316						North	2050	optimistic	0.487997			2040	8.57138	18.4017
2003	5.7449						South	2050	optimistic	-3.03658			2050	8.44064	21.157
2004	6.67436						West	2050	optimistic	0.342961
2005	6.35794
2006	6.97492						table	delta_vs_BAU_pessimistic
2007	6.35913						region	horizon_year	scenario	delta_vs_BAU_kg_n_per_ha
2008	6.44721						Central	2050	pessimistic	-0.614715
2009	6.26259						East	2050	pessimistic	-12.5367
2010	7.79138						North	2050	pessimistic	-0.873134
2011	7.14507						South	2050	pessimistic	-6.82262
2012	7.53368						West	2050	pessimistic	-0.135158
2013	8.13447
2014	8.26538
2015	7.87017
2016	8.47875
2017	10.4604
2018	9.79138
2019	10.1939
2020	11.9515
2021	10.9515
2022	9.29911
table	scenario_BAU
year	value_kg_n_per_ha	scenario	lo_kg_n_per_ha	hi_kg_n_per_ha
2030	11.2021	BAU	8.53842	14.9139
2035	12.5648	BAU	9.15462	16.1418
2040	14.2968	BAU	10.3405	18.0197
2050	16.5352	BAU	12.3189	21.157
table	scenario_equitable
year	value_kg_n_per_ha	scenario	lo_kg_n_per_ha	hi_kg_n_per_ha
2030	29.5859	equitable	29.5859	29.5859
2035	41.1823	equitable	41.1823	41.1823
2040	52.8063	equitable	52.8063	52.8063
2050	76.125	equitable	76.125	76.125
table	scenario_optimistic
year	value_kg_n_per_ha	scenario	lo_kg_n_per_ha	hi_kg_n_per_ha
2030	13.9984	optimistic	10.4827	18.1567
2035	14.539	optimistic	10.2179	18.2323
2040	14.2464	optimistic	10.1609	18.4017
2050	14.034	optimistic	9.84806	18.2898
table	scenario_pessimistic
year	value_kg_n_per_ha	scenario	lo_kg_n_per_ha	hi_kg_n_per_ha
2030	11.8632	pessimistic	9.35043	15.861
2035	11.9037	pessimistic	8.85152	15.937
2040	11.6972	pessimistic	8.57138	16.0193
2050	11.6748	pessimistic	8.44064	15.8652

## Sheet: Fig. 2
sheet_label	Fig. 2
subplot				subplot	quadrant
table				table	figure3_pt3_opportunity_categories_land_area_quadrant_shading_scoreS
quantity	equation			country	r	g	category	country_clean	land_area	circle_area_indicator
M (best achievable 2050 intensity)	M = max(BAU_2050, OPT_2050, PESS_2050)			Cameroon	0.0648345	-0.0370639	Low-return constrained	cameroon	472710	472710
r (benchmark fraction)	r = M / B			Central African Republic	0.00910177	0.538837	Low ceiling / high growth	central_african_republic	622980	622980
g (growth potential)	g = (M - H) / max(H, H_min)			Chad	0.0300661	-0.42808	Low-return constrained	chad	1259200	1259200
High benchmark positioning	1 if r >= Q0.75(r), else 0			Congo, Dem. Rep.	0.0608562	1.75912	Low ceiling / high growth	congo_dem_rep	2267050	2267050
Significant growth	1 if g >= tau, else 0			Congo, Rep.	0.018845	-0.724853	Low-return constrained	congo_rep	341500	341500
Category code	Category code = 2*(High benchmark) + (High growth)			Gabon	0.21204	0.0171835	Low-return constrained	gabon	257670	257670
				Sao Tome And Principe	0.0548918	0.0441565	Low-return constrained	sao_tome_and_principe	960	960
				Burundi	0.201307	2.44961	Low ceiling / high growth	burundi	25680	25680
				Comoros	0.061798	3.5971	Low ceiling / high growth	comoros	1861	1861
				Djibouti	0.183962	-0.0414761	Low-return constrained	djibouti	23180	23180
				Eritrea	0.0419261	-0.235966	Low-return constrained	eritrea	121178	121178
				Ethiopia	0.786756	1.44859	High-return opportunity	ethiopia	1.1285e+06	1.1285e+06
				Kenya	0.460465	1.5629	High-return opportunity	kenya	580876	580876
				Mauritius	0.539525	-0.449902	High ceiling / low growth	mauritius	1997	1997
				Rwanda	0.261378	0.97339	High-return opportunity	rwanda	24670	24670
				Sudan	0.14043	1.90179	Low ceiling / high growth	sudan	1868000	1868000
				Tanzania	0.310739	1.09101	High-return opportunity	tanzania	885800	885800
				Uganda	0.131167	8.05559	Low ceiling / high growth	uganda	200520	200520
				Algeria	0.116247	0.273924	Low-return constrained	algeria	2381740	2381740
				Libya	0.0881959	0.192228	Low-return constrained	libya	1759540	1759540
				Mauritania	0.0787919	0.528601	Low ceiling / high growth	mauritania	1030700	1030700
				Morocco	0.260786	-0.0415556	Low-return constrained	morocco	446300	446300
				Tunisia	0.188789	-0.0999117	Low-return constrained	tunisia	155360	155360
				Angola	0.207693	1.33219	Low ceiling / high growth	angola	1246700	1246700
				Botswana	1.0129	-0.0503567	High ceiling / low growth	botswana	566730	566730
				Eswatini	1.00303	0.533799	High-return opportunity	eswatini	17200	17200
				Lesotho	0.111346	-0.0870927	Low-return constrained	lesotho	30360	30360
				Madagascar	0.148795	1.62493	Low ceiling / high growth	madagascar	581800	581800
				Malawi	0.514587	1.44684	High-return opportunity	malawi	94280	94280
				Mozambique	0.27438	2.0782	High-return opportunity	mozambique	786380	786380
				Namibia	0.856844	2.38572	High-return opportunity	namibia	823290	823290
				South Africa	0.834565	0.209237	High ceiling / low growth	south_africa	1213090	1213090
				Zambia	0.858795	0.376987	High ceiling / low growth	zambia	743390	743390
				Zimbabwe	0.254321	-0.306749	Low-return constrained	zimbabwe	386850	386850
				Benin	0.143466	-0.255998	Low-return constrained	benin	112760	112760
				Burkina Faso	0.0871487	0.117326	Low-return constrained	burkina_faso	273600	273600
				Cabo Verde	0.0333041	0.25902	Low-return constrained	cabo_verde	4030	4030
				Gambia, The	0.0288961	1.20537	Low ceiling / high growth	gambia_the	10120	10120
				Ghana	0.109834	-0.152143	Low-return constrained	ghana	227533	227533
				Guinea	0.062873	0.986887	Low ceiling / high growth	guinea	245720	245720
				Guinea-Bissau	0.0493015	-0.05486	Low-return constrained	guinea_bissau	28120	28120
				Liberia	0.06023	0.168492	Low-return constrained	liberia	96320	96320
				Mali	0.159029	4.33837	Low ceiling / high growth	mali	1220190	1220190
				Niger	0.0340388	2.40374	Low ceiling / high growth	niger	1266700	1266700
				Nigeria	0.0713656	1.08429	Low ceiling / high growth	nigeria	910770	910770
				Senegal	0.135445	-0.185921	Low-return constrained	senegal	192530	192530
				Sierra Leone	0.0651719	2.71296	Low ceiling / high growth	sierra_leone	72180	72180
				Togo	0.0576761	-0.443862	Low-return constrained	togo	54390	54390

## Sheet: Fig. 3
sheet_label	Fig. 3
subplot	a									subplot	c							subplot	drivers
table	scenario_tornado_differences_vs_synthcap									table	shap_over_time__arable_land_per_capita							table	driver_top8_namibia
year	series	diff_kg_n_per_ha	lo_diff_kg_n_per_ha	hi_diff_kg_n_per_ha	country	region	slug			year	mean_abs_shap	feature	country	slug	region			bau_pct	opt_pct	pes_pct	delta_opt	delta_pes	delta_mag	feature
2022	Historical	-12.1429			Namibia	South	namibia			2000	1.77905	arable_land_per_capita	Namibia	namibia	South			0.111111	0.361111	0.111111	0.25	0	0.25	pulses_total_yield
2030	Trend projection (ML)	7.4033	-8.49163	19.968	Namibia	South	namibia			2001	1.78604	arable_land_per_capita	Namibia	namibia	South			0.925926	0.693504	0.99	-0.232422	0.0640741	0.232422	crop_prod_index
2030	Optimistic	13.9687	1.78097	21.8141	Namibia	South	namibia			2002	2.74657	arable_land_per_capita	Namibia	namibia	South			0.0740741	0.222023	0.0740741	0.147949	0	0.147949	livestock_prod_index
2030	Pessimistic	11.6412	-2.94882	24.2324	Namibia	South	namibia			2003	1.94987	arable_land_per_capita	Namibia	namibia	South			0.888889	0.99	0.888889	0.101111	0	0.101111	nutrient_nitrogen_n_total_use_per_capita
2040	Trend projection (ML)	2.67764	-12.2286	18.0668	Namibia	South	namibia			2004	2.53753	arable_land_per_capita	Namibia	namibia	South			0.0740741	0.01	0.0740741	-0.0640741	0	0.0640741	arable_land_per_capita
2040	Optimistic	-0.255239	-12.5082	7.01758	Namibia	South	namibia			2005	1.96278	arable_land_per_capita	Namibia	namibia	South
2040	Pessimistic	-4.21221	-20.526	9.72155	Namibia	South	namibia			2006	2.37529	arable_land_per_capita	Namibia	namibia	South
2050	Trend projection (ML)	-8.14559	-22.7688	3.72429	Namibia	South	namibia			2007	2.12838	arable_land_per_capita	Namibia	namibia	South
2050	Optimistic	-16.0135	-26.185	-7.51613	Namibia	South	namibia			2008	1.76263	arable_land_per_capita	Namibia	namibia	South
2050	Pessimistic	-18.9838	-36.1377	-6.10891	Namibia	South	namibia			2009	1.96404	arable_land_per_capita	Namibia	namibia	South
										2010	2.45833	arable_land_per_capita	Namibia	namibia	South
										2011	3.00708	arable_land_per_capita	Namibia	namibia	South
										2012	4.78291	arable_land_per_capita	Namibia	namibia	South
										2013	3.486	arable_land_per_capita	Namibia	namibia	South
										2014	2.71737	arable_land_per_capita	Namibia	namibia	South
										2015	4.43341	arable_land_per_capita	Namibia	namibia	South
										2016	5.40068	arable_land_per_capita	Namibia	namibia	South
										2017	5.42355	arable_land_per_capita	Namibia	namibia	South
										2018	4.58818	arable_land_per_capita	Namibia	namibia	South
										2019	4.58082	arable_land_per_capita	Namibia	namibia	South
										2020	1.39906	arable_land_per_capita	Namibia	namibia	South
										2021	1.30268	arable_land_per_capita	Namibia	namibia	South
										2022	2.76153	arable_land_per_capita	Namibia	namibia	South
										2030	0.149828	arable_land_per_capita	Namibia	namibia	South
										2035	2.02161	arable_land_per_capita	Namibia	namibia	South
										2040	5.82159	arable_land_per_capita	Namibia	namibia	South
										2050	9.50066	arable_land_per_capita	Namibia	namibia	South
										table	shap_over_time__crop_prod_index
										year	mean_abs_shap	feature	country	slug	region
										2000	0.647563	crop_prod_index	Namibia	namibia	South
										2001	0.468548	crop_prod_index	Namibia	namibia	South
										2002	0.385127	crop_prod_index	Namibia	namibia	South
										2003	0.447304	crop_prod_index	Namibia	namibia	South
										2004	0.11921	crop_prod_index	Namibia	namibia	South
										2005	0.185011	crop_prod_index	Namibia	namibia	South
										2006	0.0499819	crop_prod_index	Namibia	namibia	South
										2007	0.0760632	crop_prod_index	Namibia	namibia	South
										2008	0.133412	crop_prod_index	Namibia	namibia	South
										2009	0.070722	crop_prod_index	Namibia	namibia	South
										2010	0.092814	crop_prod_index	Namibia	namibia	South
										2011	0.0670932	crop_prod_index	Namibia	namibia	South
										2012	0.246812	crop_prod_index	Namibia	namibia	South
										2013	0.119117	crop_prod_index	Namibia	namibia	South
										2014	0.288302	crop_prod_index	Namibia	namibia	South
										2015	0.30613	crop_prod_index	Namibia	namibia	South
										2016	0.229153	crop_prod_index	Namibia	namibia	South
										2017	1.33576	crop_prod_index	Namibia	namibia	South
										2018	1.50132	crop_prod_index	Namibia	namibia	South
										2019	0.203972	crop_prod_index	Namibia	namibia	South
										2020	0.959794	crop_prod_index	Namibia	namibia	South
										2021	0.984162	crop_prod_index	Namibia	namibia	South
										2022	0.906914	crop_prod_index	Namibia	namibia	South
										2030	2.12891	crop_prod_index	Namibia	namibia	South
										2035	1.77255	crop_prod_index	Namibia	namibia	South
										2040	1.09438	crop_prod_index	Namibia	namibia	South
										2050	1.39938	crop_prod_index	Namibia	namibia	South
										table	shap_over_time__livestock_prod_index
										year	mean_abs_shap	feature	country	slug	region
										2000	0.060802	livestock_prod_index	Namibia	namibia	South
										2001	0.12562	livestock_prod_index	Namibia	namibia	South
										2002	0.142557	livestock_prod_index	Namibia	namibia	South
										2003	0.119929	livestock_prod_index	Namibia	namibia	South
										2004	0.0420652	livestock_prod_index	Namibia	namibia	South
										2005	0.0163319	livestock_prod_index	Namibia	namibia	South
										2006	0.0849182	livestock_prod_index	Namibia	namibia	South
										2007	0.00471526	livestock_prod_index	Namibia	namibia	South
										2008	0.088307	livestock_prod_index	Namibia	namibia	South
										2009	0.132788	livestock_prod_index	Namibia	namibia	South
										2010	0.133364	livestock_prod_index	Namibia	namibia	South
										2011	0.130259	livestock_prod_index	Namibia	namibia	South
										2012	0.296223	livestock_prod_index	Namibia	namibia	South
										2013	0.174536	livestock_prod_index	Namibia	namibia	South
										2014	0.0580527	livestock_prod_index	Namibia	namibia	South
										2015	0.102024	livestock_prod_index	Namibia	namibia	South
										2016	0.200564	livestock_prod_index	Namibia	namibia	South
										2017	0.374317	livestock_prod_index	Namibia	namibia	South
										2018	0.37439	livestock_prod_index	Namibia	namibia	South
										2019	0.0784523	livestock_prod_index	Namibia	namibia	South
										2020	0.153437	livestock_prod_index	Namibia	namibia	South
										2021	0.15298	livestock_prod_index	Namibia	namibia	South
										2022	0.0213149	livestock_prod_index	Namibia	namibia	South
										2030	0.300933	livestock_prod_index	Namibia	namibia	South
										2035	0.705729	livestock_prod_index	Namibia	namibia	South
										2040	1.14868	livestock_prod_index	Namibia	namibia	South
										2050	1.76588	livestock_prod_index	Namibia	namibia	South
										table	shap_over_time__nutrient_nitrogen_n_total_use_per_capita
										year	mean_abs_shap	feature	country	slug	region
										2000	11.7922	nutrient_nitrogen_n_total_use_per_capita	Namibia	namibia	South
										2001	11.9412	nutrient_nitrogen_n_total_use_per_capita	Namibia	namibia	South
										2002	7.86336	nutrient_nitrogen_n_total_use_per_capita	Namibia	namibia	South
										2003	11.2639	nutrient_nitrogen_n_total_use_per_capita	Namibia	namibia	South
										2004	9.07847	nutrient_nitrogen_n_total_use_per_capita	Namibia	namibia	South
										2005	10.9625	nutrient_nitrogen_n_total_use_per_capita	Namibia	namibia	South
										2006	9.59586	nutrient_nitrogen_n_total_use_per_capita	Namibia	namibia	South
										2007	10.6966	nutrient_nitrogen_n_total_use_per_capita	Namibia	namibia	South
										2008	11.9713	nutrient_nitrogen_n_total_use_per_capita	Namibia	namibia	South
										2009	10.8446	nutrient_nitrogen_n_total_use_per_capita	Namibia	namibia	South
										2010	8.55968	nutrient_nitrogen_n_total_use_per_capita	Namibia	namibia	South
										2011	5.34771	nutrient_nitrogen_n_total_use_per_capita	Namibia	namibia	South
										2012	4.50756	nutrient_nitrogen_n_total_use_per_capita	Namibia	namibia	South
										2013	1.52162	nutrient_nitrogen_n_total_use_per_capita	Namibia	namibia	South
										2014	7.25034	nutrient_nitrogen_n_total_use_per_capita	Namibia	namibia	South
										2015	2.54112	nutrient_nitrogen_n_total_use_per_capita	Namibia	namibia	South
										2016	16.125	nutrient_nitrogen_n_total_use_per_capita	Namibia	namibia	South
										2017	14.4742	nutrient_nitrogen_n_total_use_per_capita	Namibia	namibia	South
										2018	26.2269	nutrient_nitrogen_n_total_use_per_capita	Namibia	namibia	South
										2019	13.6422	nutrient_nitrogen_n_total_use_per_capita	Namibia	namibia	South
										2020	10.3337	nutrient_nitrogen_n_total_use_per_capita	Namibia	namibia	South
										2021	10.4473	nutrient_nitrogen_n_total_use_per_capita	Namibia	namibia	South
										2022	2.09175	nutrient_nitrogen_n_total_use_per_capita	Namibia	namibia	South
										2030	18.3074	nutrient_nitrogen_n_total_use_per_capita	Namibia	namibia	South
										2035	23.6524	nutrient_nitrogen_n_total_use_per_capita	Namibia	namibia	South
										2040	28.609	nutrient_nitrogen_n_total_use_per_capita	Namibia	namibia	South
										2050	27.2403	nutrient_nitrogen_n_total_use_per_capita	Namibia	namibia	South
										table	shap_over_time__pulses_total_yield
										year	mean_abs_shap	feature	country	slug	region
										2000	0.662264	pulses_total_yield	Namibia	namibia	South
										2001	0.716932	pulses_total_yield	Namibia	namibia	South
										2002	0.779938	pulses_total_yield	Namibia	namibia	South
										2003	0.640651	pulses_total_yield	Namibia	namibia	South
										2004	0.731492	pulses_total_yield	Namibia	namibia	South
										2005	0.698685	pulses_total_yield	Namibia	namibia	South
										2006	0.739754	pulses_total_yield	Namibia	namibia	South
										2007	0.641378	pulses_total_yield	Namibia	namibia	South
										2008	0.652366	pulses_total_yield	Namibia	namibia	South
										2009	0.688882	pulses_total_yield	Namibia	namibia	South
										2010	0.725589	pulses_total_yield	Namibia	namibia	South
										2011	0.79386	pulses_total_yield	Namibia	namibia	South
										2012	0.89374	pulses_total_yield	Namibia	namibia	South
										2013	0.859643	pulses_total_yield	Namibia	namibia	South
										2014	0.749333	pulses_total_yield	Namibia	namibia	South
										2015	0.998238	pulses_total_yield	Namibia	namibia	South
										2016	1.16014	pulses_total_yield	Namibia	namibia	South
										2017	0.987369	pulses_total_yield	Namibia	namibia	South
										2018	1.12053	pulses_total_yield	Namibia	namibia	South
										2019	1.16864	pulses_total_yield	Namibia	namibia	South
										2020	0.659449	pulses_total_yield	Namibia	namibia	South
										2021	0.679214	pulses_total_yield	Namibia	namibia	South
										2022	0.90951	pulses_total_yield	Namibia	namibia	South
										2030	1.35857	pulses_total_yield	Namibia	namibia	South
										2035	1.88866	pulses_total_yield	Namibia	namibia	South
										2040	2.56211	pulses_total_yield	Namibia	namibia	South
										2050	2.86511	pulses_total_yield	Namibia	namibia	South

## Sheet: Fig. 4
sheet_label	Fig. 4
subplot	a									subplot	c							subplot	drivers
table	scenario_tornado_differences_vs_synthcap									table	shap_over_time__gdp_per_capita_usd							table	driver_top8_central_african_republic
year	series	diff_kg_n_per_ha	lo_diff_kg_n_per_ha	hi_diff_kg_n_per_ha	country	region	slug			year	mean_abs_shap	feature	country	slug	region			bau_pct	opt_pct	pes_pct	delta_opt	delta_pes	delta_mag	feature
2022	Historical	-17.2257			Central African Republic	Central	central_african_republic			2000	0.180977	gdp_per_capita_usd	Central African Republic	central_african_republic	Central			0.259259	0.509259	0.259259	0.25	0	0.25	nutrient_nitrogen_n_total_use_per_value_of_agricultural_production
2030	Trend projection (ML)	-16.8955	-17.0525	-16.7755	Central African Republic	Central	central_african_republic			2001	0.187196	gdp_per_capita_usd	Central African Republic	central_african_republic	Central			0.407407	0.657407	0.407407	0.25	0	0.25	nutrient_nitrogen_n_total_synthetic_fertilizers_emissions_n2o
2030	Optimistic	-16.8045	-16.9451	-16.7129	Central African Republic	Central	central_african_republic			2002	0.18983	gdp_per_capita_usd	Central African Republic	central_african_republic	Central			0.925926	0.99	0.925926	0.0640741	0	0.0640741	mobile_subscriptions_per_100
2030	Pessimistic	-17.0383	-17.2159	-16.8857	Central African Republic	Central	central_african_republic			2003	0.194555	gdp_per_capita_usd	Central African Republic	central_african_republic	Central			0	0.01	0.01	0.01	0.01	0.01	gdp_per_capita_usd
2040	Trend projection (ML)	-38.3356	-38.4651	-38.1838	Central African Republic	Central	central_african_republic			2004	0.176544	gdp_per_capita_usd	Central African Republic	central_african_republic	Central			0.333333	0.333333	0.333333	0	0	0	land_area_equipped_for_irrigation_share_in_cropland
2040	Optimistic	-38.3264	-38.4707	-38.2372	Central African Republic	Central	central_african_republic			2005	0.17491	gdp_per_capita_usd	Central African Republic	central_african_republic	Central
2040	Pessimistic	-38.5652	-38.7281	-38.4086	Central African Republic	Central	central_african_republic			2006	0.174819	gdp_per_capita_usd	Central African Republic	central_african_republic	Central
2050	Trend projection (ML)	-59.7512	-59.9063	-59.609	Central African Republic	Central	central_african_republic			2007	0.128526	gdp_per_capita_usd	Central African Republic	central_african_republic	Central
2050	Optimistic	-59.8595	-60.0114	-59.7674	Central African Republic	Central	central_african_republic			2008	0.118077	gdp_per_capita_usd	Central African Republic	central_african_republic	Central
2050	Pessimistic	-60.0875	-60.2692	-59.9134	Central African Republic	Central	central_african_republic			2009	0.119322	gdp_per_capita_usd	Central African Republic	central_african_republic	Central
										2010	0.0897475	gdp_per_capita_usd	Central African Republic	central_african_republic	Central
										2011	0.0841095	gdp_per_capita_usd	Central African Republic	central_african_republic	Central
										2012	0.0828708	gdp_per_capita_usd	Central African Republic	central_african_republic	Central
										2013	0.138569	gdp_per_capita_usd	Central African Republic	central_african_republic	Central
										2014	0.131593	gdp_per_capita_usd	Central African Republic	central_african_republic	Central
										2015	0.13356	gdp_per_capita_usd	Central African Republic	central_african_republic	Central
										2016	0.128643	gdp_per_capita_usd	Central African Republic	central_african_republic	Central
										2017	0.130762	gdp_per_capita_usd	Central African Republic	central_african_republic	Central
										2018	0.126398	gdp_per_capita_usd	Central African Republic	central_african_republic	Central
										2019	0.140244	gdp_per_capita_usd	Central African Republic	central_african_republic	Central
										2020	0.111521	gdp_per_capita_usd	Central African Republic	central_african_republic	Central
										2021	0.110904	gdp_per_capita_usd	Central African Republic	central_african_republic	Central
										2022	0.110826	gdp_per_capita_usd	Central African Republic	central_african_republic	Central
										2030	0.221912	gdp_per_capita_usd	Central African Republic	central_african_republic	Central
										2035	0.220759	gdp_per_capita_usd	Central African Republic	central_african_republic	Central
										2040	0.215938	gdp_per_capita_usd	Central African Republic	central_african_republic	Central
										2050	0.197715	gdp_per_capita_usd	Central African Republic	central_african_republic	Central
										table	shap_over_time__land_area_equipped_for_irrigation_share_in_cropland
										year	mean_abs_shap	feature	country	slug	region
										2000	0.190299	land_area_equipped_for_irrigation_share_in_cropland	Central African Republic	central_african_republic	Central
										2001	0.1878	land_area_equipped_for_irrigation_share_in_cropland	Central African Republic	central_african_republic	Central
										2002	0.19727	land_area_equipped_for_irrigation_share_in_cropland	Central African Republic	central_african_republic	Central
										2003	0.203484	land_area_equipped_for_irrigation_share_in_cropland	Central African Republic	central_african_republic	Central
										2004	0.200706	land_area_equipped_for_irrigation_share_in_cropland	Central African Republic	central_african_republic	Central
										2005	0.199137	land_area_equipped_for_irrigation_share_in_cropland	Central African Republic	central_african_republic	Central
										2006	0.199781	land_area_equipped_for_irrigation_share_in_cropland	Central African Republic	central_african_republic	Central
										2007	0.20965	land_area_equipped_for_irrigation_share_in_cropland	Central African Republic	central_african_republic	Central
										2008	0.210196	land_area_equipped_for_irrigation_share_in_cropland	Central African Republic	central_african_republic	Central
										2009	0.215426	land_area_equipped_for_irrigation_share_in_cropland	Central African Republic	central_african_republic	Central
										2010	0.21788	land_area_equipped_for_irrigation_share_in_cropland	Central African Republic	central_african_republic	Central
										2011	0.222387	land_area_equipped_for_irrigation_share_in_cropland	Central African Republic	central_african_republic	Central
										2012	0.229835	land_area_equipped_for_irrigation_share_in_cropland	Central African Republic	central_african_republic	Central
										2013	0.235291	land_area_equipped_for_irrigation_share_in_cropland	Central African Republic	central_african_republic	Central
										2014	0.223268	land_area_equipped_for_irrigation_share_in_cropland	Central African Republic	central_african_republic	Central
										2015	0.235067	land_area_equipped_for_irrigation_share_in_cropland	Central African Republic	central_african_republic	Central
										2016	0.237317	land_area_equipped_for_irrigation_share_in_cropland	Central African Republic	central_african_republic	Central
										2017	0.223248	land_area_equipped_for_irrigation_share_in_cropland	Central African Republic	central_african_republic	Central
										2018	0.236733	land_area_equipped_for_irrigation_share_in_cropland	Central African Republic	central_african_republic	Central
										2019	0.243409	land_area_equipped_for_irrigation_share_in_cropland	Central African Republic	central_african_republic	Central
										2020	0.269147	land_area_equipped_for_irrigation_share_in_cropland	Central African Republic	central_african_republic	Central
										2021	0.268382	land_area_equipped_for_irrigation_share_in_cropland	Central African Republic	central_african_republic	Central
										2022	0.269093	land_area_equipped_for_irrigation_share_in_cropland	Central African Republic	central_african_republic	Central
										2030	0.2288	land_area_equipped_for_irrigation_share_in_cropland	Central African Republic	central_african_republic	Central
										2035	0.228573	land_area_equipped_for_irrigation_share_in_cropland	Central African Republic	central_african_republic	Central
										2040	0.229489	land_area_equipped_for_irrigation_share_in_cropland	Central African Republic	central_african_republic	Central
										2050	0.21209	land_area_equipped_for_irrigation_share_in_cropland	Central African Republic	central_african_republic	Central
										table	shap_over_time__mobile_subscriptions_per_100
										year	mean_abs_shap	feature	country	slug	region
										2000	0.20159	mobile_subscriptions_per_100	Central African Republic	central_african_republic	Central
										2001	0.197034	mobile_subscriptions_per_100	Central African Republic	central_african_republic	Central
										2002	0.195291	mobile_subscriptions_per_100	Central African Republic	central_african_republic	Central
										2003	0.187474	mobile_subscriptions_per_100	Central African Republic	central_african_republic	Central
										2004	0.175002	mobile_subscriptions_per_100	Central African Republic	central_african_republic	Central
										2005	0.167742	mobile_subscriptions_per_100	Central African Republic	central_african_republic	Central
										2006	0.176574	mobile_subscriptions_per_100	Central African Republic	central_african_republic	Central
										2007	0.177785	mobile_subscriptions_per_100	Central African Republic	central_african_republic	Central
										2008	0.153853	mobile_subscriptions_per_100	Central African Republic	central_african_republic	Central
										2009	0.144487	mobile_subscriptions_per_100	Central African Republic	central_african_republic	Central
										2010	0.147297	mobile_subscriptions_per_100	Central African Republic	central_african_republic	Central
										2011	0.14711	mobile_subscriptions_per_100	Central African Republic	central_african_republic	Central
										2012	0.139068	mobile_subscriptions_per_100	Central African Republic	central_african_republic	Central
										2013	0.0863698	mobile_subscriptions_per_100	Central African Republic	central_african_republic	Central
										2014	0.139856	mobile_subscriptions_per_100	Central African Republic	central_african_republic	Central
										2015	0.0953515	mobile_subscriptions_per_100	Central African Republic	central_african_republic	Central
										2016	0.0972433	mobile_subscriptions_per_100	Central African Republic	central_african_republic	Central
										2017	0.139198	mobile_subscriptions_per_100	Central African Republic	central_african_republic	Central
										2018	0.10465	mobile_subscriptions_per_100	Central African Republic	central_african_republic	Central
										2019	0.0526247	mobile_subscriptions_per_100	Central African Republic	central_african_republic	Central
										2020	0.0461581	mobile_subscriptions_per_100	Central African Republic	central_african_republic	Central
										2021	0.0422581	mobile_subscriptions_per_100	Central African Republic	central_african_republic	Central
										2022	0.104113	mobile_subscriptions_per_100	Central African Republic	central_african_republic	Central
										2030	0.259556	mobile_subscriptions_per_100	Central African Republic	central_african_republic	Central
										2035	0.288822	mobile_subscriptions_per_100	Central African Republic	central_african_republic	Central
										2040	0.342091	mobile_subscriptions_per_100	Central African Republic	central_african_republic	Central
										2050	0.48906	mobile_subscriptions_per_100	Central African Republic	central_african_republic	Central
										table	shap_over_time__nutrient_nitrogen_n_total_synthetic_fertilizers_emissions_n2o
										year	mean_abs_shap	feature	country	slug	region
										2000	0.321946	nutrient_nitrogen_n_total_synthetic_fertilizers_emissions_n2o	Central African Republic	central_african_republic	Central
										2001	0.322465	nutrient_nitrogen_n_total_synthetic_fertilizers_emissions_n2o	Central African Republic	central_african_republic	Central
										2002	0.336258	nutrient_nitrogen_n_total_synthetic_fertilizers_emissions_n2o	Central African Republic	central_african_republic	Central
										2003	0.335133	nutrient_nitrogen_n_total_synthetic_fertilizers_emissions_n2o	Central African Republic	central_african_republic	Central
										2004	0.339315	nutrient_nitrogen_n_total_synthetic_fertilizers_emissions_n2o	Central African Republic	central_african_republic	Central
										2005	0.309022	nutrient_nitrogen_n_total_synthetic_fertilizers_emissions_n2o	Central African Republic	central_african_republic	Central
										2006	0.291925	nutrient_nitrogen_n_total_synthetic_fertilizers_emissions_n2o	Central African Republic	central_african_republic	Central
										2007	0.281078	nutrient_nitrogen_n_total_synthetic_fertilizers_emissions_n2o	Central African Republic	central_african_republic	Central
										2008	0.332053	nutrient_nitrogen_n_total_synthetic_fertilizers_emissions_n2o	Central African Republic	central_african_republic	Central
										2009	0.329552	nutrient_nitrogen_n_total_synthetic_fertilizers_emissions_n2o	Central African Republic	central_african_republic	Central
										2010	0.324529	nutrient_nitrogen_n_total_synthetic_fertilizers_emissions_n2o	Central African Republic	central_african_republic	Central
										2011	0.239152	nutrient_nitrogen_n_total_synthetic_fertilizers_emissions_n2o	Central African Republic	central_african_republic	Central
										2012	0.333619	nutrient_nitrogen_n_total_synthetic_fertilizers_emissions_n2o	Central African Republic	central_african_republic	Central
										2013	0.332705	nutrient_nitrogen_n_total_synthetic_fertilizers_emissions_n2o	Central African Republic	central_african_republic	Central
										2014	0.348474	nutrient_nitrogen_n_total_synthetic_fertilizers_emissions_n2o	Central African Republic	central_african_republic	Central
										2015	0.328008	nutrient_nitrogen_n_total_synthetic_fertilizers_emissions_n2o	Central African Republic	central_african_republic	Central
										2016	0.322504	nutrient_nitrogen_n_total_synthetic_fertilizers_emissions_n2o	Central African Republic	central_african_republic	Central
										2017	0.351008	nutrient_nitrogen_n_total_synthetic_fertilizers_emissions_n2o	Central African Republic	central_african_republic	Central
										2018	0.322344	nutrient_nitrogen_n_total_synthetic_fertilizers_emissions_n2o	Central African Republic	central_african_republic	Central
										2019	0.334366	nutrient_nitrogen_n_total_synthetic_fertilizers_emissions_n2o	Central African Republic	central_african_republic	Central
										2020	0.335717	nutrient_nitrogen_n_total_synthetic_fertilizers_emissions_n2o	Central African Republic	central_african_republic	Central
										2021	0.335219	nutrient_nitrogen_n_total_synthetic_fertilizers_emissions_n2o	Central African Republic	central_african_republic	Central
										2022	0.356013	nutrient_nitrogen_n_total_synthetic_fertilizers_emissions_n2o	Central African Republic	central_african_republic	Central
										2030	0.337224	nutrient_nitrogen_n_total_synthetic_fertilizers_emissions_n2o	Central African Republic	central_african_republic	Central
										2035	0.339831	nutrient_nitrogen_n_total_synthetic_fertilizers_emissions_n2o	Central African Republic	central_african_republic	Central
										2040	0.345081	nutrient_nitrogen_n_total_synthetic_fertilizers_emissions_n2o	Central African Republic	central_african_republic	Central
										2050	0.358836	nutrient_nitrogen_n_total_synthetic_fertilizers_emissions_n2o	Central African Republic	central_african_republic	Central
										table	shap_over_time__nutrient_nitrogen_n_total_use_per_value_of_agricultural_production
										year	mean_abs_shap	feature	country	slug	region
										2000	0.884313	nutrient_nitrogen_n_total_use_per_value_of_agricultural_production	Central African Republic	central_african_republic	Central
										2001	0.885294	nutrient_nitrogen_n_total_use_per_value_of_agricultural_production	Central African Republic	central_african_republic	Central
										2002	0.953534	nutrient_nitrogen_n_total_use_per_value_of_agricultural_production	Central African Republic	central_african_republic	Central
										2003	0.957637	nutrient_nitrogen_n_total_use_per_value_of_agricultural_production	Central African Republic	central_african_republic	Central
										2004	0.975538	nutrient_nitrogen_n_total_use_per_value_of_agricultural_production	Central African Republic	central_african_republic	Central
										2005	0.901127	nutrient_nitrogen_n_total_use_per_value_of_agricultural_production	Central African Republic	central_african_republic	Central
										2006	0.888693	nutrient_nitrogen_n_total_use_per_value_of_agricultural_production	Central African Republic	central_african_republic	Central
										2007	0.907832	nutrient_nitrogen_n_total_use_per_value_of_agricultural_production	Central African Republic	central_african_republic	Central
										2008	0.96428	nutrient_nitrogen_n_total_use_per_value_of_agricultural_production	Central African Republic	central_african_republic	Central
										2009	0.969156	nutrient_nitrogen_n_total_use_per_value_of_agricultural_production	Central African Republic	central_african_republic	Central
										2010	0.9873	nutrient_nitrogen_n_total_use_per_value_of_agricultural_production	Central African Republic	central_african_republic	Central
										2011	0.98033	nutrient_nitrogen_n_total_use_per_value_of_agricultural_production	Central African Republic	central_african_republic	Central
										2012	0.991508	nutrient_nitrogen_n_total_use_per_value_of_agricultural_production	Central African Republic	central_african_republic	Central
										2013	1.02515	nutrient_nitrogen_n_total_use_per_value_of_agricultural_production	Central African Republic	central_african_republic	Central
										2014	1.02747	nutrient_nitrogen_n_total_use_per_value_of_agricultural_production	Central African Republic	central_african_republic	Central
										2015	0.969658	nutrient_nitrogen_n_total_use_per_value_of_agricultural_production	Central African Republic	central_african_republic	Central
										2016	0.985419	nutrient_nitrogen_n_total_use_per_value_of_agricultural_production	Central African Republic	central_african_republic	Central
										2017	1.02841	nutrient_nitrogen_n_total_use_per_value_of_agricultural_production	Central African Republic	central_african_republic	Central
										2018	0.991708	nutrient_nitrogen_n_total_use_per_value_of_agricultural_production	Central African Republic	central_african_republic	Central
										2019	1.03197	nutrient_nitrogen_n_total_use_per_value_of_agricultural_production	Central African Republic	central_african_republic	Central
										2020	1.11034	nutrient_nitrogen_n_total_use_per_value_of_agricultural_production	Central African Republic	central_african_republic	Central
										2021	1.10887	nutrient_nitrogen_n_total_use_per_value_of_agricultural_production	Central African Republic	central_african_republic	Central
										2022	1.11741	nutrient_nitrogen_n_total_use_per_value_of_agricultural_production	Central African Republic	central_african_republic	Central
										2030	1.00944	nutrient_nitrogen_n_total_use_per_value_of_agricultural_production	Central African Republic	central_african_republic	Central
										2035	1.0043	nutrient_nitrogen_n_total_use_per_value_of_agricultural_production	Central African Republic	central_african_republic	Central
										2040	1.01089	nutrient_nitrogen_n_total_use_per_value_of_agricultural_production	Central African Republic	central_african_republic	Central
										2050	1.03854	nutrient_nitrogen_n_total_use_per_value_of_agricultural_production	Central African Republic	central_african_republic	Central

## Sheet: Fig. 5
sheet_label	Fig. 5
subplot	country_stacked_input					subplot	region_stacked_input
table	country_shap_df_mean_abs_shap					table	africa_swarm_bpso_stacked_pivot
country	region	feature	mean_abs_shap			feature	Central	East	North	South	West
Algeria	North	arable_land_per_capita	0.163503			ag_employment_female_pct					0.426876
Algeria	North	crop_prod_index	0.577785			agric_land_pct					0.470521
Algeria	North	land_area_equipped_for_irrigation_share_in_cropland	0.408064			arable_land_per_capita			0.287505	3.38268
Algeria	North	mobile_subscriptions_per_100	0.270934			crop_prod_index			0.497325	0.747718
Algeria	North	nutrient_nitrogen_n_total_use_per_value_of_agricultural_production	5.80017			cropland_area_per_capita		6.54301
Algeria	North	oilcrops_primary_gross_production_value_constant_2014-2016_thousand_iusd	1.51845			cropland_share_in_land_area		1.72068
Algeria	North	temperature_temperature_change	0.230179			gdp_per_capita_usd	0.187591
Angola	South	arable_land_per_capita	0.675946			land_area_equipped_for_irrigation_share_in_cropland	0.249361	3.84584	0.642055
Angola	South	crop_prod_index	0.687143			livestock_prod_index				0.427004
Angola	South	livestock_prod_index	0.283467			male_waged_pct					0.399356
Angola	South	nutrient_nitrogen_n_total_use_per_capita	12.0443			mobile_subscriptions_per_100	0.408308		0.465082
Angola	South	pulses_total_yield	0.203135			nutrient_nitrogen_n_total_synthetic_fertilizers_emissions_n2o	0.421364	1.26857			2.15221
Benin	West	ag_employment_female_pct	0.703335			nutrient_nitrogen_n_total_use_per_capita		10.2537		12.6213
Benin	West	agric_land_pct	0.508367			nutrient_nitrogen_n_total_use_per_value_of_agricultural_production	1.03792		4.70987
Benin	West	male_waged_pct	0.33594			oilcrops_primary_gross_production_value_constant_2014-2016_thousand_iusd			1.77644
Benin	West	nutrient_nitrogen_n_total_synthetic_fertilizers_emissions_n2o	3.1046			pulses_total_area_harvested					0.37368
Benin	West	pulses_total_area_harvested	0.414877			pulses_total_yield				0.820383
Benin	West	unemployment_male_pct	0.441943			temperature_temperature_change			0.176412
Botswana	South	arable_land_per_capita	10.8337			unemployment_male_pct					0.235547
Botswana	South	crop_prod_index	1.39568
Botswana	South	livestock_prod_index	1.07163
Botswana	South	nutrient_nitrogen_n_total_use_per_capita	18.0297
Botswana	South	pulses_total_yield	1.90686
Burkina Faso	West	ag_employment_female_pct	0.299604
Burkina Faso	West	agric_land_pct	0.178234
Burkina Faso	West	male_waged_pct	0.424878
Burkina Faso	West	nutrient_nitrogen_n_total_synthetic_fertilizers_emissions_n2o	2.29299
Burkina Faso	West	pulses_total_area_harvested	0.566884
Burkina Faso	West	unemployment_male_pct	0.219082
Burundi	East	cropland_area_per_capita	4.03319
Burundi	East	cropland_share_in_land_area	0.265742
Burundi	East	land_area_equipped_for_irrigation_share_in_cropland	3.17037
Burundi	East	nutrient_nitrogen_n_total_synthetic_fertilizers_emissions_n2o	1.18564
Burundi	East	nutrient_nitrogen_n_total_use_per_capita	9.51353
Cabo Verde	West	ag_employment_female_pct	0.869296
Cabo Verde	West	agric_land_pct	0.252672
Cabo Verde	West	male_waged_pct	0.309625
Cabo Verde	West	nutrient_nitrogen_n_total_synthetic_fertilizers_emissions_n2o	2.34021
Cabo Verde	West	pulses_total_area_harvested	0.158229
Cabo Verde	West	unemployment_male_pct	0.116957
Cameroon	Central	gdp_per_capita_usd	0.255194
Cameroon	Central	land_area_equipped_for_irrigation_share_in_cropland	0.0832883
Cameroon	Central	mobile_subscriptions_per_100	0.503186
Cameroon	Central	nutrient_nitrogen_n_total_synthetic_fertilizers_emissions_n2o	0.69396
Cameroon	Central	nutrient_nitrogen_n_total_use_per_value_of_agricultural_production	1.0536
Central African Republic	Central	gdp_per_capita_usd	0.14892
Central African Republic	Central	land_area_equipped_for_irrigation_share_in_cropland	0.223102
Central African Republic	Central	mobile_subscriptions_per_100	0.16658
Central African Republic	Central	nutrient_nitrogen_n_total_synthetic_fertilizers_emissions_n2o	0.327533
Central African Republic	Central	nutrient_nitrogen_n_total_use_per_value_of_agricultural_production	0.989116
Chad	Central	gdp_per_capita_usd	0.181579
Chad	Central	land_area_equipped_for_irrigation_share_in_cropland	0.247451
Chad	Central	mobile_subscriptions_per_100	0.321957
Chad	Central	nutrient_nitrogen_n_total_synthetic_fertilizers_emissions_n2o	0.266551
Chad	Central	nutrient_nitrogen_n_total_use_per_value_of_agricultural_production	0.492872
Comoros	East	cropland_area_per_capita	2.39182
Comoros	East	cropland_share_in_land_area	0.352761
Comoros	East	land_area_equipped_for_irrigation_share_in_cropland	3.39282
Comoros	East	nutrient_nitrogen_n_total_synthetic_fertilizers_emissions_n2o	1.64337
Comoros	East	nutrient_nitrogen_n_total_use_per_capita	8.99824
Congo Dem Rep	Central	gdp_per_capita_usd	0.257364
Congo Dem Rep	Central	land_area_equipped_for_irrigation_share_in_cropland	0.271533
Congo Dem Rep	Central	mobile_subscriptions_per_100	0.229604
Congo Dem Rep	Central	nutrient_nitrogen_n_total_synthetic_fertilizers_emissions_n2o	0.309097
Congo Dem Rep	Central	nutrient_nitrogen_n_total_use_per_value_of_agricultural_production	0.79256
Congo Rep	Central	gdp_per_capita_usd	0.195876
Congo Rep	Central	land_area_equipped_for_irrigation_share_in_cropland	0.121314
Congo Rep	Central	mobile_subscriptions_per_100	0.432395
Congo Rep	Central	nutrient_nitrogen_n_total_synthetic_fertilizers_emissions_n2o	0.242976
Congo Rep	Central	nutrient_nitrogen_n_total_use_per_value_of_agricultural_production	1.2041
Cote Divoire	West	ag_employment_female_pct	0.239446
Cote Divoire	West	agric_land_pct	0.698097
Cote Divoire	West	male_waged_pct	0.260285
Cote Divoire	West	nutrient_nitrogen_n_total_synthetic_fertilizers_emissions_n2o	2.35917
Cote Divoire	West	pulses_total_area_harvested	0.307593
Cote Divoire	West	unemployment_male_pct	0.416437
Djibouti	East	cropland_area_per_capita	11.838
Djibouti	East	cropland_share_in_land_area	4.28594
Djibouti	East	land_area_equipped_for_irrigation_share_in_cropland	7.28045
Djibouti	East	nutrient_nitrogen_n_total_synthetic_fertilizers_emissions_n2o	2.05353
Djibouti	East	nutrient_nitrogen_n_total_use_per_capita	15.857
Equatorial Guinea	Central	gdp_per_capita_usd	0.169801
Equatorial Guinea	Central	land_area_equipped_for_irrigation_share_in_cropland	0.204308
Equatorial Guinea	Central	mobile_subscriptions_per_100	0.253121
Equatorial Guinea	Central	nutrient_nitrogen_n_total_synthetic_fertilizers_emissions_n2o	0.386177
Equatorial Guinea	Central	nutrient_nitrogen_n_total_use_per_value_of_agricultural_production	0.417955
Eritrea	East	cropland_area_per_capita	3.07448
Eritrea	East	cropland_share_in_land_area	1.01981
Eritrea	East	land_area_equipped_for_irrigation_share_in_cropland	0.852389
Eritrea	East	nutrient_nitrogen_n_total_synthetic_fertilizers_emissions_n2o	0.725803
Eritrea	East	nutrient_nitrogen_n_total_use_per_capita	5.73889
Eswatini	South	arable_land_per_capita	4.35563
Eswatini	South	crop_prod_index	0.50563
Eswatini	South	livestock_prod_index	0.476838
Eswatini	South	nutrient_nitrogen_n_total_use_per_capita	11.4646
Eswatini	South	pulses_total_yield	0.530221
Ethiopia	East	cropland_area_per_capita	1.4921
Ethiopia	East	cropland_share_in_land_area	1.14368
Ethiopia	East	land_area_equipped_for_irrigation_share_in_cropland	0.97575
Ethiopia	East	nutrient_nitrogen_n_total_synthetic_fertilizers_emissions_n2o	0.853434
Ethiopia	East	nutrient_nitrogen_n_total_use_per_capita	7.46785
Gabon	Central	gdp_per_capita_usd	0.586428
Gabon	Central	land_area_equipped_for_irrigation_share_in_cropland	0.478377
Gabon	Central	mobile_subscriptions_per_100	0.90902
Gabon	Central	nutrient_nitrogen_n_total_synthetic_fertilizers_emissions_n2o	0.57686
Gabon	Central	nutrient_nitrogen_n_total_use_per_value_of_agricultural_production	2.33559
Gambia The	West	ag_employment_female_pct	0.161141
Gambia The	West	agric_land_pct	0.379062
Gambia The	West	male_waged_pct	0.469418
Gambia The	West	nutrient_nitrogen_n_total_synthetic_fertilizers_emissions_n2o	1.85322
Gambia The	West	pulses_total_area_harvested	0.324356
Gambia The	West	unemployment_male_pct	0.238295
Ghana	West	ag_employment_female_pct	0.217811
Ghana	West	agric_land_pct	0.325746
Ghana	West	male_waged_pct	0.493288
Ghana	West	nutrient_nitrogen_n_total_synthetic_fertilizers_emissions_n2o	2.47872
Ghana	West	pulses_total_area_harvested	0.285448
Ghana	West	unemployment_male_pct	0.321113
Guinea	West	ag_employment_female_pct	0.471971
Guinea	West	agric_land_pct	0.520482
Guinea	West	male_waged_pct	0.364792
Guinea	West	nutrient_nitrogen_n_total_synthetic_fertilizers_emissions_n2o	1.02424
Guinea	West	pulses_total_area_harvested	0.131146
Guinea	West	unemployment_male_pct	0.359929
Guineabissau	West	ag_employment_female_pct	0.324067
Guineabissau	West	agric_land_pct	0.591267
Guineabissau	West	male_waged_pct	0.345151
Guineabissau	West	nutrient_nitrogen_n_total_synthetic_fertilizers_emissions_n2o	1.07249
Guineabissau	West	pulses_total_area_harvested	0.555075
Guineabissau	West	unemployment_male_pct	0.141861
Kenya	East	cropland_area_per_capita	2.68333
Kenya	East	cropland_share_in_land_area	0.752106
Kenya	East	land_area_equipped_for_irrigation_share_in_cropland	0.899343
Kenya	East	nutrient_nitrogen_n_total_synthetic_fertilizers_emissions_n2o	0.70932
Kenya	East	nutrient_nitrogen_n_total_use_per_capita	2.58895
Lesotho	South	arable_land_per_capita	4.22457
Lesotho	South	crop_prod_index	0.507593
Lesotho	South	livestock_prod_index	0.165768
Lesotho	South	nutrient_nitrogen_n_total_use_per_capita	12.0762
Lesotho	South	pulses_total_yield	0.47788
Liberia	West	ag_employment_female_pct	0.250981
Liberia	West	agric_land_pct	0.717089
Liberia	West	male_waged_pct	0.338179
Liberia	West	nutrient_nitrogen_n_total_synthetic_fertilizers_emissions_n2o	0.837807
Liberia	West	pulses_total_area_harvested	0.670261
Liberia	West	unemployment_male_pct	0.187875
Libya	North	arable_land_per_capita	0.256348
Libya	North	crop_prod_index	0.272093
Libya	North	land_area_equipped_for_irrigation_share_in_cropland	0.560684
Libya	North	mobile_subscriptions_per_100	0.488959
Libya	North	nutrient_nitrogen_n_total_use_per_value_of_agricultural_production	4.08183
Libya	North	oilcrops_primary_gross_production_value_constant_2014-2016_thousand_iusd	1.90001
Libya	North	temperature_temperature_change	0.141361
Madagascar	South	arable_land_per_capita	3.49314
Madagascar	South	crop_prod_index	0.471416
Madagascar	South	livestock_prod_index	0.175658
Madagascar	South	nutrient_nitrogen_n_total_use_per_capita	13.2445
Madagascar	South	pulses_total_yield	1.33455
Malawi	South	arable_land_per_capita	1.25938
Malawi	South	crop_prod_index	1.05719
Malawi	South	livestock_prod_index	0.311744
Malawi	South	nutrient_nitrogen_n_total_use_per_capita	8.60767
Malawi	South	pulses_total_yield	0.840978
Mali	West	ag_employment_female_pct	0.307852
Mali	West	agric_land_pct	0.811015
Mali	West	male_waged_pct	0.41518
Mali	West	nutrient_nitrogen_n_total_synthetic_fertilizers_emissions_n2o	5.04691
Mali	West	pulses_total_area_harvested	0.322745
Mali	West	unemployment_male_pct	0.289666
Mauritania	North	arable_land_per_capita	0.186922
Mauritania	North	crop_prod_index	0.533971
Mauritania	North	land_area_equipped_for_irrigation_share_in_cropland	0.375121
Mauritania	North	mobile_subscriptions_per_100	0.242422
Mauritania	North	nutrient_nitrogen_n_total_use_per_value_of_agricultural_production	5.61865
Mauritania	North	oilcrops_primary_gross_production_value_constant_2014-2016_thousand_iusd	1.17649
Mauritania	North	temperature_temperature_change	0.207974
Mauritius	East	cropland_area_per_capita	22.2125
Mauritius	East	cropland_share_in_land_area	5.17763
Mauritius	East	land_area_equipped_for_irrigation_share_in_cropland	15.5267
Mauritius	East	nutrient_nitrogen_n_total_synthetic_fertilizers_emissions_n2o	3.38413
Mauritius	East	nutrient_nitrogen_n_total_use_per_capita	31.8736
Morocco	North	arable_land_per_capita	0.542356
Morocco	North	crop_prod_index	0.568381
Morocco	North	land_area_equipped_for_irrigation_share_in_cropland	1.03168
Morocco	North	mobile_subscriptions_per_100	0.710377
Morocco	North	nutrient_nitrogen_n_total_use_per_value_of_agricultural_production	6.17263
Morocco	North	oilcrops_primary_gross_production_value_constant_2014-2016_thousand_iusd	2.34304
Morocco	North	temperature_temperature_change	0.232254
Mozambique	South	arable_land_per_capita	0.89952
Mozambique	South	crop_prod_index	0.689446
Mozambique	South	livestock_prod_index	0.245908
Mozambique	South	nutrient_nitrogen_n_total_use_per_capita	10.1123
Mozambique	South	pulses_total_yield	0.20572
Namibia	South	arable_land_per_capita	3.14176
Namibia	South	crop_prod_index	0.600723
Namibia	South	livestock_prod_index	0.258858
Namibia	South	nutrient_nitrogen_n_total_use_per_capita	12.107
Namibia	South	pulses_total_yield	1.0123
Niger	West	ag_employment_female_pct	0.526132
Niger	West	agric_land_pct	0.153194
Niger	West	male_waged_pct	0.540259
Niger	West	nutrient_nitrogen_n_total_synthetic_fertilizers_emissions_n2o	1.2917
Niger	West	pulses_total_area_harvested	0.82941
Niger	West	unemployment_male_pct	0.11687
Nigeria	West	ag_employment_female_pct	0.334259
Nigeria	West	agric_land_pct	0.984564
Nigeria	West	male_waged_pct	0.543327
Nigeria	West	nutrient_nitrogen_n_total_synthetic_fertilizers_emissions_n2o	3.69703
Nigeria	West	pulses_total_area_harvested	0.671386
Nigeria	West	unemployment_male_pct	0.284882
Rwanda	East	cropland_area_per_capita	3.2976
Rwanda	East	cropland_share_in_land_area	0.351073
Rwanda	East	land_area_equipped_for_irrigation_share_in_cropland	3.77053
Rwanda	East	nutrient_nitrogen_n_total_synthetic_fertilizers_emissions_n2o	1.36703
Rwanda	East	nutrient_nitrogen_n_total_use_per_capita	8.95055
Sao Tome And Principe	Central	gdp_per_capita_usd	0.208818
Sao Tome And Principe	Central	land_area_equipped_for_irrigation_share_in_cropland	0.326627
Sao Tome And Principe	Central	mobile_subscriptions_per_100	0.382085
Sao Tome And Principe	Central	nutrient_nitrogen_n_total_synthetic_fertilizers_emissions_n2o	0.453253
Sao Tome And Principe	Central	nutrient_nitrogen_n_total_use_per_value_of_agricultural_production	0.641846
Senegal	West	ag_employment_female_pct	0.724984
Senegal	West	agric_land_pct	0.268408
Senegal	West	male_waged_pct	0.58694
Senegal	West	nutrient_nitrogen_n_total_synthetic_fertilizers_emissions_n2o	2.20587
Senegal	West	pulses_total_area_harvested	0.424505
Senegal	West	unemployment_male_pct	0.291479
Seychelles	East	cropland_area_per_capita	12.196
Seychelles	East	cropland_share_in_land_area	3.48473
Seychelles	East	land_area_equipped_for_irrigation_share_in_cropland	5.04234
Seychelles	East	nutrient_nitrogen_n_total_synthetic_fertilizers_emissions_n2o	1.64526
Seychelles	East	nutrient_nitrogen_n_total_use_per_capita	14.8683
Sierra Leone	West	ag_employment_female_pct	0.429135
Sierra Leone	West	agric_land_pct	0.503536
Sierra Leone	West	male_waged_pct	0.501431
Sierra Leone	West	nutrient_nitrogen_n_total_synthetic_fertilizers_emissions_n2o	1.07115
Sierra Leone	West	pulses_total_area_harvested	0.159168
Sierra Leone	West	unemployment_male_pct	0.341033
Somalia	East	cropland_area_per_capita	8.46408
Somalia	East	cropland_share_in_land_area	3.76115
Somalia	East	land_area_equipped_for_irrigation_share_in_cropland	6.16852
Somalia	East	nutrient_nitrogen_n_total_synthetic_fertilizers_emissions_n2o	1.22292
Somalia	East	nutrient_nitrogen_n_total_use_per_capita	14.9056
South Africa	South	arable_land_per_capita	2.78161
South Africa	South	crop_prod_index	0.741902
South Africa	South	livestock_prod_index	0.558458
South Africa	South	nutrient_nitrogen_n_total_use_per_capita	18.5819
South Africa	South	pulses_total_yield	1.74037
South Sudan	East	cropland_area_per_capita	4.06983
South Sudan	East	cropland_share_in_land_area	1.02598
South Sudan	East	land_area_equipped_for_irrigation_share_in_cropland	1.70252
South Sudan	East	nutrient_nitrogen_n_total_synthetic_fertilizers_emissions_n2o	1.14181
South Sudan	East	nutrient_nitrogen_n_total_use_per_capita	6.14711
Sudan	East	cropland_area_per_capita	6.92146
Sudan	East	cropland_share_in_land_area	1.28615
Sudan	East	land_area_equipped_for_irrigation_share_in_cropland	1.25142
Sudan	East	nutrient_nitrogen_n_total_synthetic_fertilizers_emissions_n2o	0.576093
Sudan	East	nutrient_nitrogen_n_total_use_per_capita	4.1424
Tanzania	East	cropland_area_per_capita	4.99958
Tanzania	East	cropland_share_in_land_area	0.688991
Tanzania	East	land_area_equipped_for_irrigation_share_in_cropland	0.903552
Tanzania	East	nutrient_nitrogen_n_total_synthetic_fertilizers_emissions_n2o	0.498199
Tanzania	East	nutrient_nitrogen_n_total_use_per_capita	4.49969
Togo	West	ag_employment_female_pct	0.482971
Togo	West	agric_land_pct	0.213406
Togo	West	male_waged_pct	0.148297
Togo	West	nutrient_nitrogen_n_total_synthetic_fertilizers_emissions_n2o	1.57255
Togo	West	pulses_total_area_harvested	0.128783
Togo	West	unemployment_male_pct	0.204374
Tunisia	North	arable_land_per_capita	0.30408
Tunisia	North	crop_prod_index	0.515372
Tunisia	North	land_area_equipped_for_irrigation_share_in_cropland	0.818205
Tunisia	North	mobile_subscriptions_per_100	0.616205
Tunisia	North	nutrient_nitrogen_n_total_use_per_value_of_agricultural_production	1.82459
Tunisia	North	oilcrops_primary_gross_production_value_constant_2014-2016_thousand_iusd	1.97922
Tunisia	North	temperature_temperature_change	0.268171
Uganda	East	cropland_area_per_capita	3.92811
Uganda	East	cropland_share_in_land_area	0.493805
Uganda	East	land_area_equipped_for_irrigation_share_in_cropland	2.90511
Uganda	East	nutrient_nitrogen_n_total_synthetic_fertilizers_emissions_n2o	0.753445
Uganda	East	nutrient_nitrogen_n_total_use_per_capita	8.00052
Zambia	South	arable_land_per_capita	2.05432
Zambia	South	crop_prod_index	0.8317
Zambia	South	livestock_prod_index	0.824008
Zambia	South	nutrient_nitrogen_n_total_use_per_capita	17.4384
Zambia	South	pulses_total_yield	0.501801
Zimbabwe	South	arable_land_per_capita	3.48988
Zimbabwe	South	crop_prod_index	0.736472
Zimbabwe	South	livestock_prod_index	0.324713
Zimbabwe	South	nutrient_nitrogen_n_total_use_per_capita	5.1272
Zimbabwe	South	pulses_total_yield	0.270392

## Sheet: SuppFig_S01
sheet_label	SuppFig_S01
subplot	a						subplot	b
table	bar_BPSO-SHAP						table	train_vs_test_rmse_points
region	pct_improvement	series	method	units			region	method	train_rmse	test_rmse
Central	16.2671	BPSO-SHAP	swarm_bpso	percent_improvement_vs_init			Central	init	0.325645	0.3295
East	40.5854	BPSO-SHAP	swarm_bpso	percent_improvement_vs_init
North	21.4482	BPSO-SHAP	swarm_bpso	percent_improvement_vs_init			table	train_vs_test_rmse_points
South	41.3716	BPSO-SHAP	swarm_bpso	percent_improvement_vs_init			region	method	train_rmse	test_rmse
West	33.7955	BPSO-SHAP	swarm_bpso	percent_improvement_vs_init			East	init	1.99678	3.5976
table	bar_BPSO-only						table	train_vs_test_rmse_points
region	pct_improvement	series	method	units			region	method	train_rmse	test_rmse
Central	36.6616	BPSO-only	bpso_only	percent_improvement_vs_init			North	init	1.59265	1.5274
East	22.5901	BPSO-only	bpso_only	percent_improvement_vs_init
North	24.3878	BPSO-only	bpso_only	percent_improvement_vs_init			table	train_vs_test_rmse_points
South	34.419	BPSO-only	bpso_only	percent_improvement_vs_init			region	method	train_rmse	test_rmse
West	34.7094	BPSO-only	bpso_only	percent_improvement_vs_init			South	init	1.97245	2.6436
table	bar_SHAP (greedy)						table	train_vs_test_rmse_points
region	pct_improvement	series	method	units			region	method	train_rmse	test_rmse
Central	37.1168	SHAP (greedy)	shap_greedy	percent_improvement_vs_init			West	init	1.17518	1.6085
East	3.59128	SHAP (greedy)	shap_greedy	percent_improvement_vs_init
North	7.58806	SHAP (greedy)	shap_greedy	percent_improvement_vs_init			table	train_vs_test_rmse_points
South	21.0168	SHAP (greedy)	shap_greedy	percent_improvement_vs_init			region	method	train_rmse	test_rmse
West	16.8293	SHAP (greedy)	shap_greedy	percent_improvement_vs_init			Central	swarm_bpso	0.362727	0.2759
table	bar_SHAP (stochastic)						table	train_vs_test_rmse_points
region	pct_improvement	series	method	units			region	method	train_rmse	test_rmse
Central	31.0167	SHAP (stochastic)	shap_stochastic	percent_improvement_vs_init			East	swarm_bpso	1.52926	2.1375
East	-1.45097	SHAP (stochastic)	shap_stochastic	percent_improvement_vs_init
North	14.7375	SHAP (stochastic)	shap_stochastic	percent_improvement_vs_init			table	train_vs_test_rmse_points
South	21.6523	SHAP (stochastic)	shap_stochastic	percent_improvement_vs_init			region	method	train_rmse	test_rmse
West	14.958	SHAP (stochastic)	shap_stochastic	percent_improvement_vs_init			North	swarm_bpso	1.35278	1.1998
table	bar_SHAP-only						table	train_vs_test_rmse_points
region	pct_improvement	series	method	units			region	method	train_rmse	test_rmse
Central	6.22155	SHAP-only	shap_only	percent_improvement_vs_init			South	swarm_bpso	1.82212	1.5499
East	-3.74972	SHAP-only	shap_only	percent_improvement_vs_init
North	14.4428	SHAP-only	shap_only	percent_improvement_vs_init			table	train_vs_test_rmse_points
South	9.10501	SHAP-only	shap_only	percent_improvement_vs_init			region	method	train_rmse	test_rmse
West	18.4582	SHAP-only	shap_only	percent_improvement_vs_init			West	swarm_bpso	0.899473	1.0649
							table	train_vs_test_rmse_points
							region	method	train_rmse	test_rmse
							Central	bpso_only	0.313037	0.2087
							table	train_vs_test_rmse_points
							region	method	train_rmse	test_rmse
							East	bpso_only	1.63985	2.7849
							table	train_vs_test_rmse_points
							region	method	train_rmse	test_rmse
							North	bpso_only	1.40018	1.1549
							table	train_vs_test_rmse_points
							region	method	train_rmse	test_rmse
							South	bpso_only	1.76412	1.7337
							table	train_vs_test_rmse_points
							region	method	train_rmse	test_rmse
							West	bpso_only	0.956596	1.0502
							table	train_vs_test_rmse_points
							region	method	train_rmse	test_rmse
							Central	shap_greedy	0.318748	0.2072
							table	train_vs_test_rmse_points
							region	method	train_rmse	test_rmse
							East	shap_greedy	2.0728	3.4684
							table	train_vs_test_rmse_points
							region	method	train_rmse	test_rmse
							North	shap_greedy	1.48547	1.4115
							table	train_vs_test_rmse_points
							region	method	train_rmse	test_rmse
							South	shap_greedy	1.64583	2.088
							table	train_vs_test_rmse_points
							region	method	train_rmse	test_rmse
							West	shap_greedy	1.03913	1.3378
							table	train_vs_test_rmse_points
							region	method	train_rmse	test_rmse
							Central	shap_only	0.308575	0.309
							table	train_vs_test_rmse_points
							region	method	train_rmse	test_rmse
							East	shap_only	2.0977	3.7325
							table	train_vs_test_rmse_points
							region	method	train_rmse	test_rmse
							North	shap_only	1.41235	1.3068
							table	train_vs_test_rmse_points
							region	method	train_rmse	test_rmse
							South	shap_only	1.74596	2.4029
							table	train_vs_test_rmse_points
							region	method	train_rmse	test_rmse
							West	shap_only	1.04587	1.3116
							table	train_vs_test_rmse_points
							region	method	train_rmse	test_rmse
							Central	shap_stochastic	0.311211	0.2273
							table	train_vs_test_rmse_points
							region	method	train_rmse	test_rmse
							East	shap_stochastic	2.03238	3.6498
							table	train_vs_test_rmse_points
							region	method	train_rmse	test_rmse
							North	shap_stochastic	1.43393	1.3023
							table	train_vs_test_rmse_points
							region	method	train_rmse	test_rmse
							South	shap_stochastic	1.6458	2.0712
							table	train_vs_test_rmse_points
							region	method	train_rmse	test_rmse
							West	shap_stochastic	1.03505	1.3679

## Sheet: SuppFig_S02
sheet_label	SuppFig_S02
subplot	tornado_central						subplot	tornado_east						subplot	tornado_north						subplot	tornado_south						subplot	tornado_west
table	bar_2021						table	bar_2021						table	bar_2021						table	bar_2021						table	bar_2021
feature	error	series	year	units			feature	error	series	year	units			feature	error	series	year	units			feature	error	series	year	units			feature	error	series	year	units
gabon	0.0148743	2021	2021	predicted_minus_raw			mauritius	-0.139543	2021	2021	predicted_minus_raw			morocco	-0.0580046	2021	2021	predicted_minus_raw			zambia	-0.0424074	2021	2021	predicted_minus_raw			mali	3.95662	2021	2021	predicted_minus_raw
chad	-0.0560577	2021	2021	predicted_minus_raw			djibouti	-1.33541	2021	2021	predicted_minus_raw			mauritania	0.0366272	2021	2021	predicted_minus_raw			mozambique	-0.986848	2021	2021	predicted_minus_raw			senegal	-0.00746231	2021	2021	predicted_minus_raw
central african republic	-0.00734733	2021	2021	predicted_minus_raw			south sudan	0.235964	2021	2021	predicted_minus_raw			algeria	0.37037	2021	2021	predicted_minus_raw			madagascar	0.801629	2021	2021	predicted_minus_raw			togo	0.584239	2021	2021	predicted_minus_raw
cameroon	-0.0737762	2021	2021	predicted_minus_raw			rwanda	0.167537	2021	2021	predicted_minus_raw			tunisia	-0.0597862	2021	2021	predicted_minus_raw			malawi	0.0908498	2021	2021	predicted_minus_raw			gambia the	-0.345034	2021	2021	predicted_minus_raw
congo dem rep	-0.043328	2021	2021	predicted_minus_raw			kenya	-0.105171	2021	2021	predicted_minus_raw			libya	-0.000107086	2021	2021	predicted_minus_raw			south africa	0.585708	2021	2021	predicted_minus_raw			cabo verde	0.275836	2021	2021	predicted_minus_raw
congo rep	-0.0200226	2021	2021	predicted_minus_raw			burundi	0.0233126	2021	2021	predicted_minus_raw										botswana	0.466726	2021	2021	predicted_minus_raw			sierra leone	0.123346	2021	2021	predicted_minus_raw
							ethiopia	-0.0666925	2021	2021	predicted_minus_raw			table	bar_2022						eswatini	-0.437137	2021	2021	predicted_minus_raw			guinea-bissau	-7.32348e-05	2021	2021	predicted_minus_raw
table	bar_2022						uganda	0.0543443	2021	2021	predicted_minus_raw			feature	error	series	year	units			lesotho	-0.365603	2021	2021	predicted_minus_raw			benin	-0.0772338	2021	2021	predicted_minus_raw
feature	error	series	year	units			eritrea	0.0355517	2021	2021	predicted_minus_raw			morocco	-1.80539	2022	2022	predicted_minus_raw			zimbabwe	-0.183526	2021	2021	predicted_minus_raw			liberia	-0.0101299	2021	2021	predicted_minus_raw
gabon	-0.428353	2022	2022	predicted_minus_raw			comoros	-0.036748	2021	2021	predicted_minus_raw			mauritania	0.631675	2022	2022	predicted_minus_raw			namibia	-0.0188233	2021	2021	predicted_minus_raw			niger	-0.00179238	2021	2021	predicted_minus_raw
chad	-0.376657	2022	2022	predicted_minus_raw			tanzania	-0.0122905	2021	2021	predicted_minus_raw			algeria	0.00483832	2022	2022	predicted_minus_raw			angola	0.053735	2021	2021	predicted_minus_raw			burkina faso	0.00134727	2021	2021	predicted_minus_raw
central african republic	0.116576	2022	2022	predicted_minus_raw										tunisia	0.0228708	2022	2022	predicted_minus_raw										ghana	0.0169837	2021	2021	predicted_minus_raw
cameroon	0.0415613	2022	2022	predicted_minus_raw			table	bar_2022						libya	-0.00397581	2022	2022	predicted_minus_raw			table	bar_2022						nigeria	0.00161591	2021	2021	predicted_minus_raw
congo dem rep	0.0159642	2022	2022	predicted_minus_raw			feature	error	series	year	units										feature	error	series	year	units			guinea	-0.00813786	2021	2021	predicted_minus_raw
congo rep	-0.00890278	2022	2022	predicted_minus_raw			mauritius	-2.12503	2022	2022	predicted_minus_raw										zambia	-3.53568	2022	2022	predicted_minus_raw
							djibouti	0.00377099	2022	2022	predicted_minus_raw										mozambique	-0.496108	2022	2022	predicted_minus_raw			table	bar_2022
							south sudan	0.236021	2022	2022	predicted_minus_raw										madagascar	0.0607941	2022	2022	predicted_minus_raw			feature	error	series	year	units
							rwanda	-0.0666692	2022	2022	predicted_minus_raw										malawi	-0.780344	2022	2022	predicted_minus_raw			mali	3.46598	2022	2022	predicted_minus_raw
							kenya	0.151612	2022	2022	predicted_minus_raw										south africa	-0.0396273	2022	2022	predicted_minus_raw			senegal	-2.34187	2022	2022	predicted_minus_raw
							burundi	0.0887725	2022	2022	predicted_minus_raw										botswana	-0.0782937	2022	2022	predicted_minus_raw			togo	-0.0401011	2022	2022	predicted_minus_raw
							ethiopia	0.081255	2022	2022	predicted_minus_raw										eswatini	0.0371269	2022	2022	predicted_minus_raw			gambia the	-0.127462	2022	2022	predicted_minus_raw
							uganda	0.0742101	2022	2022	predicted_minus_raw										lesotho	0.13439	2022	2022	predicted_minus_raw			cabo verde	0.0643608	2022	2022	predicted_minus_raw
							eritrea	-0.0567266	2022	2022	predicted_minus_raw										zimbabwe	0.0772031	2022	2022	predicted_minus_raw			sierra leone	0.242185	2022	2022	predicted_minus_raw
							comoros	0.00319195	2022	2022	predicted_minus_raw										namibia	-0.0906074	2022	2022	predicted_minus_raw			guinea-bissau	0.0796116	2022	2022	predicted_minus_raw
							tanzania	-0.000623683	2022	2022	predicted_minus_raw										angola	0.0060633	2022	2022	predicted_minus_raw			benin	-0.00757695	2022	2022	predicted_minus_raw
																												liberia	0.0552614	2022	2022	predicted_minus_raw
																												niger	0.0213365	2022	2022	predicted_minus_raw
																												burkina faso	-0.0207835	2022	2022	predicted_minus_raw
																												ghana	-0.00305937	2022	2022	predicted_minus_raw
																												nigeria	0.00987652	2022	2022	predicted_minus_raw
																												guinea	0.00283938	2022	2022	predicted_minus_raw

## Sheet: SuppFig_S03
sheet_label	SuppFig_S03
subplot	country_angola								subplot	country_botswana								subplot	country_eswatini								subplot	country_lesotho								subplot	country_madagascar								subplot	country_malawi
table	historical								table	historical								table	historical								table	historical								table	historical								table	historical
year	value_kg_n_per_ha	country	region						year	value_kg_n_per_ha	country	region						year	value_kg_n_per_ha	country	region						year	value_kg_n_per_ha	country	region						year	value_kg_n_per_ha	country	region						year	value_kg_n_per_ha	country	region
2000	0.44	Angola	South						2000	11.68	Botswana	South						2000	10.47	Eswatini	South						2000	10.24	Lesotho	South						2000	1.08	Madagascar	South						2000	12.01	Malawi	South
2002	0.84	Angola	South						2001	20.4	Botswana	South						2001	10.42	Eswatini	South						2001	14.7	Lesotho	South						2001	0.9	Madagascar	South						2001	5.63	Malawi	South
2003	0.51	Angola	South						2009	42.86	Botswana	South						2002	31.65	Eswatini	South						2015	6.72	Lesotho	South						2002	0.76	Madagascar	South						2002	20.16	Malawi	South
2004	2.05	Angola	South						2010	76.39	Botswana	South						2003	24.82	Eswatini	South						2016	4.28	Lesotho	South						2003	1.32	Madagascar	South						2003	19.49	Malawi	South
2005	1.05	Angola	South						2011	25.95	Botswana	South						2004	25.76	Eswatini	South						2017	3.35	Lesotho	South						2004	0.81	Madagascar	South						2004	22.88	Malawi	South
2006	1.9	Angola	South						2012	52.79	Botswana	South						2005	21.06	Eswatini	South						2018	7.01	Lesotho	South						2005	2.07	Madagascar	South						2005	19.87	Malawi	South
2007	1.55	Angola	South						2013	77.95	Botswana	South						2006	27.18	Eswatini	South						2019	19.79	Lesotho	South						2006	1.06	Madagascar	South						2006	24.15	Malawi	South
2008	2.27	Angola	South						2014	52.37	Botswana	South						2007	27.84	Eswatini	South						2020	7.82	Lesotho	South						2007	1.25	Madagascar	South						2007	24.55	Malawi	South
2009	2.47	Angola	South						2015	50.17	Botswana	South						2008	26.15	Eswatini	South						2021	13.09	Lesotho	South						2008	2.08	Madagascar	South						2008	27.39	Malawi	South
2010	3.92	Angola	South						2016	40.9	Botswana	South						2009	26.72	Eswatini	South						2022	6.94	Lesotho	South						2009	1.23	Madagascar	South						2009	19.82	Malawi	South
2011	3.32	Angola	South						2017	21.37	Botswana	South						2010	26.38	Eswatini	South															2010	1.27	Madagascar	South						2010	26.56	Malawi	South
2012	3.92	Angola	South						2018	48.34	Botswana	South						2011	28.15	Eswatini	South						table	scenario_BAU								2011	2.41	Madagascar	South						2011	23.37	Malawi	South
2013	3.98	Angola	South						2019	38.16	Botswana	South						2012	29.63	Eswatini	South						year	value_kg_n_per_ha	scenario	country	region	lo_kg_n_per_ha	hi_kg_n_per_ha			2012	4.68	Madagascar	South						2012	16.07	Malawi	South
2014	5.2	Angola	South						2020	52.07	Botswana	South						2013	28.63	Eswatini	South						2030	7.12533	BAU	Lesotho	South	3.79176	10.7513			2013	2.85	Madagascar	South						2013	15.91	Malawi	South
2015	4.7	Angola	South						2021	49.94	Botswana	South						2014	27.41	Eswatini	South						2035	6.18468	BAU	Lesotho	South	2.7425	10.4014			2014	5.09	Madagascar	South						2014	31.12	Malawi	South
2016	3.67	Angola	South						2022	60.69	Botswana	South						2015	25.25	Eswatini	South						2040	5.61136	BAU	Lesotho	South	2.50076	9.45208			2015	4.57	Madagascar	South						2015	28.38	Malawi	South
2017	4.72	Angola	South															2016	23.6	Eswatini	South						2050	5.45815	BAU	Lesotho	South	2.32233	8.75286			2016	2.59	Madagascar	South						2016	16.18	Malawi	South
2018	3.82	Angola	South						table	scenario_BAU								2017	32.33	Eswatini	South															2017	8.73	Madagascar	South						2017	21.8	Malawi	South
2019	2.97	Angola	South						year	value_kg_n_per_ha	scenario	country	region	lo_kg_n_per_ha	hi_kg_n_per_ha			2018	36.07	Eswatini	South						table	scenario_equitable								2018	7.97	Madagascar	South						2018	23.97	Malawi	South
2020	4.22	Angola	South						2030	56.7581	BAU	Botswana	South	42.1027	59.526			2019	36.91	Eswatini	South						year	value_kg_n_per_ha	scenario	country	region	lo_kg_n_per_ha	hi_kg_n_per_ha			2019	6.72	Madagascar	South						2019	18.71	Malawi	South
2021	3.04	Angola	South						2035	56.1527	BAU	Botswana	South	46.7433	63.2803			2020	39.41	Eswatini	South						2030	21.2143	equitable	Lesotho	South	21.2143	21.2143			2020	5.31	Madagascar	South						2020	30.7	Malawi	South
2022	5.37	Angola	South						2040	54.8419	BAU	Botswana	South	46.2384	63.643			2021	41.36	Eswatini	South						2035	30.1357	equitable	Lesotho	South	30.1357	30.1357			2021	2.66	Madagascar	South						2021	24.66	Malawi	South
									2050	53.3104	BAU	Botswana	South	44.2862	61.1878			2022	37.21	Eswatini	South						2040	39.0571	equitable	Lesotho	South	39.0571	39.0571			2022	4.07	Madagascar	South						2022	15.1	Malawi	South
table	scenario_BAU																										2050	56.9	equitable	Lesotho	South	56.9	56.9
year	value_kg_n_per_ha	scenario	country	region	lo_kg_n_per_ha	hi_kg_n_per_ha			table	scenario_equitable								table	scenario_BAU																	table	scenario_BAU								table	scenario_BAU
2030	6.8193	BAU	Angola	South	4.73662	8.31482			year	value_kg_n_per_ha	scenario	country	region	lo_kg_n_per_ha	hi_kg_n_per_ha			year	value_kg_n_per_ha	scenario	country	region	lo_kg_n_per_ha	hi_kg_n_per_ha			table	scenario_optimistic								year	value_kg_n_per_ha	scenario	country	region	lo_kg_n_per_ha	hi_kg_n_per_ha			year	value_kg_n_per_ha	scenario	country	region
2035	7.58171	BAU	Angola	South	6.01837	10.6941			2030	24.3857	equitable	Botswana	South	24.3857	24.3857			2030	45.5417	BAU	Eswatini	South	38.1957	52.1919			year	value_kg_n_per_ha	scenario	country	region	lo_kg_n_per_ha	hi_kg_n_per_ha			2030	8.16158	BAU	Madagascar	South	5.04825	9.75618			2030	27.644	BAU	Malawi	South
2040	8.47181	BAU	Angola	South	6.677	12.7901			2035	32.5143	equitable	Botswana	South	32.5143	32.5143			2035	49.1923	BAU	Eswatini	South	41.6253	56.0542			2030	6.10447	optimistic	Lesotho	South	3.39939	10.906			2035	8.89809	BAU	Madagascar	South	6.25473	11.2757			2035	29.7521	BAU	Malawi	South
2050	12.5239	BAU	Angola	South	8.26976	15.0242			2040	40.6429	equitable	Botswana	South	40.6429	40.6429			2040	51.7932	BAU	Eswatini	South	44.4637	58.9238			2035	6.69433	optimistic	Lesotho	South	3.72001	10.7697			2040	9.52356	BAU	Madagascar	South	7.23392	11.8049			2040	31.215	BAU	Malawi	South
									2050	56.9	equitable	Botswana	South	56.9	56.9			2050	57.0727	BAU	Eswatini	South	49.3258	62.5548			2040	6.59057	optimistic	Lesotho	South	3.22057	10.4582			2050	10.6835	BAU	Madagascar	South	9.65443	13.4373			2050	36.9473	BAU	Malawi	South
table	scenario_equitable																										2050	6.33558	optimistic	Lesotho	South	3.39193	10.5995
year	value_kg_n_per_ha	scenario	country	region	lo_kg_n_per_ha	hi_kg_n_per_ha			table	scenario_optimistic								table	scenario_equitable																	table	scenario_equitable								table	scenario_equitable
2030	21.0643	equitable	Angola	South	21.0643	21.0643			year	value_kg_n_per_ha	scenario	country	region	lo_kg_n_per_ha	hi_kg_n_per_ha			year	value_kg_n_per_ha	scenario	country	region	lo_kg_n_per_ha	hi_kg_n_per_ha			table	scenario_pessimistic								year	value_kg_n_per_ha	scenario	country	region	lo_kg_n_per_ha	hi_kg_n_per_ha			year	value_kg_n_per_ha	scenario	country	region
2035	30.8732	equitable	Angola	South	30.8732	30.8732			2030	57.2383	optimistic	Botswana	South	51.1356	62.0694			2030	42.8357	equitable	Eswatini	South	42.8357	42.8357			year	value_kg_n_per_ha	scenario	country	region	lo_kg_n_per_ha	hi_kg_n_per_ha			2030	23.4214	equitable	Madagascar	South	23.4214	23.4214			2030	31.3	equitable	Malawi	South
2040	40.6821	equitable	Angola	South	40.6821	40.6821			2035	57.0277	optimistic	Botswana	South	52.5061	62.4593			2035	46.3518	equitable	Eswatini	South	46.3518	46.3518			2030	6.10281	pessimistic	Lesotho	South	3.73522	8.19461			2035	35.5161	equitable	Madagascar	South	35.5161	35.5161			2035	41.425	equitable	Malawi	South
2050	60.3	equitable	Angola	South	60.3	60.3			2040	57.3334	optimistic	Botswana	South	51.9506	62.8753			2040	49.8679	equitable	Eswatini	South	49.8679	49.8679			2035	6.07809	pessimistic	Lesotho	South	3.60686	8.55464			2040	47.6107	equitable	Madagascar	South	47.6107	47.6107			2040	51.55	equitable	Malawi	South
									2050	57.6338	optimistic	Botswana	South	50.8368	63.5622			2050	56.9	equitable	Eswatini	South	56.9	56.9			2040	6.07351	pessimistic	Lesotho	South	3.06828	8.19868			2050	71.8	equitable	Madagascar	South	71.8	71.8			2050	71.8	equitable	Malawi	South
table	scenario_optimistic																										2050	5.98139	pessimistic	Lesotho	South	3.46124	8.14813
year	value_kg_n_per_ha	scenario	country	region	lo_kg_n_per_ha	hi_kg_n_per_ha			table	scenario_pessimistic								table	scenario_optimistic																	table	scenario_optimistic								table	scenario_optimistic
2030	9.19182	optimistic	Angola	South	6.96353	12.9812			year	value_kg_n_per_ha	scenario	country	region	lo_kg_n_per_ha	hi_kg_n_per_ha			year	value_kg_n_per_ha	scenario	country	region	lo_kg_n_per_ha	hi_kg_n_per_ha												year	value_kg_n_per_ha	scenario	country	region	lo_kg_n_per_ha	hi_kg_n_per_ha			year	value_kg_n_per_ha	scenario	country	region
2035	9.93512	optimistic	Angola	South	6.92727	12.9941			2030	54.0105	pessimistic	Botswana	South	44.6381	57.5165			2030	52.5886	optimistic	Eswatini	South	46.649	59.5453												2030	9.248	optimistic	Madagascar	South	6.35015	11.3845			2030	32.4942	optimistic	Malawi	South
2040	9.99108	optimistic	Angola	South	6.85778	13.644			2035	53.9918	pessimistic	Botswana	South	43.59	56.7401			2035	52.9853	optimistic	Eswatini	South	46.799	59.0497												2035	9.37938	optimistic	Madagascar	South	6.55597	11.5851			2035	32.8978	optimistic	Malawi	South
2050	9.55731	optimistic	Angola	South	6.71184	13.3769			2040	54.1876	pessimistic	Botswana	South	42.3571	56.984			2040	53.0221	optimistic	Eswatini	South	46.9246	59.2663												2040	9.18064	optimistic	Madagascar	South	6.4413	10.9901			2040	32.7386	optimistic	Malawi	South
									2050	54.0438	pessimistic	Botswana	South	40.4998	56.9187			2050	52.9269	optimistic	Eswatini	South	46.0889	58.389												2050	9.18361	optimistic	Madagascar	South	6.75297	11.3972			2050	32.5628	optimistic	Malawi	South
table	scenario_pessimistic
year	value_kg_n_per_ha	scenario	country	region	lo_kg_n_per_ha	hi_kg_n_per_ha												table	scenario_pessimistic																	table	scenario_pessimistic								table	scenario_pessimistic
2030	6.83742	pessimistic	Angola	South	4.84747	8.98418												year	value_kg_n_per_ha	scenario	country	region	lo_kg_n_per_ha	hi_kg_n_per_ha												year	value_kg_n_per_ha	scenario	country	region	lo_kg_n_per_ha	hi_kg_n_per_ha			year	value_kg_n_per_ha	scenario	country	region
2035	6.80219	pessimistic	Angola	South	4.65488	8.9671												2030	45.5041	pessimistic	Eswatini	South	39.1723	51.9581												2030	8.70893	pessimistic	Madagascar	South	6.5785	9.89059			2030	27.2201	pessimistic	Malawi	South
2040	6.6945	pessimistic	Angola	South	4.41567	9.02831												2035	45.2207	pessimistic	Eswatini	South	38.384	52.5861												2035	8.506	pessimistic	Madagascar	South	6.43256	9.96484			2035	27.1164	pessimistic	Malawi	South
2050	6.77	pessimistic	Angola	South	4.28228	8.88143												2040	44.8204	pessimistic	Eswatini	South	38.1161	52.8453												2040	8.49234	pessimistic	Madagascar	South	6.25546	9.95776			2040	26.5421	pessimistic	Malawi	South
																		2050	44.9015	pessimistic	Eswatini	South	37.2523	51.8008												2050	8.36604	pessimistic	Madagascar	South	6.48148	9.70844			2050	26.8891	pessimistic	Malawi	South
[truncated: 37 more columns]

## Sheet: SuppFig_S04
sheet_label	SuppFig_S04
subplot	country_cameroon								subplot	country_central_african_republic								subplot	country_chad								subplot	country_congo,_dem._rep.								subplot	country_congo,_rep.								subplot	country_gabon
table	historical								table	historical								table	historical								table	historical								table	historical								table	historical
year	value_kg_n_per_ha	country	region						year	value_kg_n_per_ha	country	region						year	value_kg_n_per_ha	country	region						year	value_kg_n_per_ha	country	region						year	value_kg_n_per_ha	country	region						year	value_kg_n_per_ha	country	region
2000	3.05	Cameroon	Central						2000	0.1	Central African Republic	Central						2000	3.03	Chad	Central						2000	0.04	Congo, Dem. Rep.	Central						2000	3.7	Congo, Rep.	Central						2000	0.2	Gabon	Central
2001	3.57	Cameroon	Central						2001	0.1	Central African Republic	Central						2001	2.95	Chad	Central						2001	0.17	Congo, Dem. Rep.	Central						2001	4.9	Congo, Rep.	Central						2001	0.2	Gabon	Central
2002	2.9	Cameroon	Central						2002	0	Central African Republic	Central						2002	1.14	Chad	Central						2003	0.14	Congo, Dem. Rep.	Central						2004	1.35	Congo, Rep.	Central						2002	1.12	Gabon	Central
2003	2.71	Cameroon	Central						2003	0	Central African Republic	Central						2003	1.07	Chad	Central						2004	0.11	Congo, Dem. Rep.	Central						2005	0.02	Congo, Rep.	Central						2003	0.38	Gabon	Central
2004	4.6	Cameroon	Central						2004	0.01	Central African Republic	Central						2004	1.76	Chad	Central						2005	0.05	Congo, Dem. Rep.	Central						2006	0.04	Congo, Rep.	Central						2004	1.37	Gabon	Central
2005	3.16	Cameroon	Central						2005	0.12	Central African Republic	Central						2005	1.34	Chad	Central						2006	0.22	Congo, Dem. Rep.	Central						2007	0.12	Congo, Rep.	Central						2005	1.17	Gabon	Central
2006	3.52	Cameroon	Central						2006	0.15	Central African Republic	Central						2006	1.65	Chad	Central						2007	0.4	Congo, Dem. Rep.	Central						2008	0.46	Congo, Rep.	Central						2006	1.61	Gabon	Central
2007	3.09	Cameroon	Central						2007	0.18	Central African Republic	Central						2007	1.52	Chad	Central						2008	0.58	Congo, Dem. Rep.	Central						2009	1.62	Congo, Rep.	Central						2007	1.8	Gabon	Central
2008	3.15	Cameroon	Central						2008	0.09	Central African Republic	Central						2008	1.72	Chad	Central						2009	0.34	Congo, Dem. Rep.	Central						2010	0.19	Congo, Rep.	Central						2008	1.66	Gabon	Central
2009	3.46	Cameroon	Central						2009	0.1	Central African Republic	Central						2009	1.76	Chad	Central						2010	0.46	Congo, Dem. Rep.	Central						2011	0.47	Congo, Rep.	Central						2009	1.78	Gabon	Central
2010	3.31	Cameroon	Central						2010	0.11	Central African Republic	Central						2010	1.92	Chad	Central						2011	0.31	Congo, Dem. Rep.	Central						2012	1.13	Congo, Rep.	Central						2010	1.2	Gabon	Central
2011	4.77	Cameroon	Central						2011	0.21	Central African Republic	Central						2011	1.92	Chad	Central						2012	0.27	Congo, Dem. Rep.	Central						2013	1.01	Congo, Rep.	Central						2011	0.77	Gabon	Central
2012	3.63	Cameroon	Central						2012	0.12	Central African Republic	Central						2012	1.68	Chad	Central						2013	0.54	Congo, Dem. Rep.	Central						2014	0.46	Congo, Rep.	Central						2012	2.63	Gabon	Central
2013	4.79	Cameroon	Central						2013	0.06	Central African Republic	Central						2013	2.04	Chad	Central						2014	1.08	Congo, Dem. Rep.	Central						2015	1.02	Congo, Rep.	Central						2013	2.58	Gabon	Central
2014	3.36	Cameroon	Central						2014	0	Central African Republic	Central						2014	2.15	Chad	Central						2015	1.28	Congo, Dem. Rep.	Central						2016	0.51	Congo, Rep.	Central						2014	3.74	Gabon	Central
2015	5.5	Cameroon	Central						2015	0.11	Central African Republic	Central						2015	2.66	Chad	Central						2016	0.78	Congo, Dem. Rep.	Central						2017	0.53	Congo, Rep.	Central						2015	8.93	Gabon	Central
2016	5.13	Cameroon	Central						2016	0.11	Central African Republic	Central						2016	2.19	Chad	Central						2017	1.06	Congo, Dem. Rep.	Central						2018	0.8	Congo, Rep.	Central						2016	7.4	Gabon	Central
2017	5.98	Cameroon	Central						2017	0.04	Central African Republic	Central						2017	2.73	Chad	Central						2018	1.28	Congo, Dem. Rep.	Central						2019	1.25	Congo, Rep.	Central						2017	15.65	Gabon	Central
2018	5.39	Cameroon	Central						2018	0.1	Central African Republic	Central						2018	2.61	Chad	Central						2019	1.75	Congo, Dem. Rep.	Central						2020	4.8	Congo, Rep.	Central						2018	12.72	Gabon	Central
2019	5.38	Cameroon	Central						2019	0.08	Central African Republic	Central						2019	2.82	Chad	Central						2020	1.51	Congo, Dem. Rep.	Central						2021	3.23	Congo, Rep.	Central						2019	11.74	Gabon	Central
2020	6.27	Cameroon	Central						2020	0.09	Central African Republic	Central						2020	2.88	Chad	Central						2021	1.51	Congo, Dem. Rep.	Central						2022	4.13	Congo, Rep.	Central						2020	5.43	Gabon	Central
2021	5.82	Cameroon	Central						2021	0.09	Central African Republic	Central						2021	2.65	Chad	Central						2022	1.33	Congo, Dem. Rep.	Central															2021	7.47	Gabon	Central
2022	4.06	Cameroon	Central						2022	0.01	Central African Republic	Central						2022	3.17	Chad	Central															table	scenario_BAU								2022	12.57	Gabon	Central
																											table	scenario_BAU								year	value_kg_n_per_ha	scenario	country	region	lo_kg_n_per_ha	hi_kg_n_per_ha
table	scenario_BAU								table	scenario_BAU								table	scenario_BAU								year	value_kg_n_per_ha	scenario	country	region	lo_kg_n_per_ha	hi_kg_n_per_ha			2030	1.11455	BAU	Congo, Rep.	Central	0.774962	2.11244			table	scenario_BAU
year	value_kg_n_per_ha	scenario	country	region	lo_kg_n_per_ha	hi_kg_n_per_ha			year	value_kg_n_per_ha	scenario	country	region	lo_kg_n_per_ha	hi_kg_n_per_ha			year	value_kg_n_per_ha	scenario	country	region	lo_kg_n_per_ha	hi_kg_n_per_ha			2030	2.05434	BAU	Congo, Dem. Rep.	Central	1.3958	2.90958			2035	1.15636	BAU	Congo, Rep.	Central	0.73787	2.01634			year	value_kg_n_per_ha	scenario	country	region
2030	3.46867	BAU	Cameroon	Central	2.54448	4.08209			2030	0.340195	BAU	Central African Republic	Central	0.183218	0.46022			2030	1.90432	BAU	Chad	Central	1.40185	2.35507			2035	2.67048	BAU	Congo, Dem. Rep.	Central	1.70905	3.48057			2040	1.10381	BAU	Congo, Rep.	Central	0.649201	1.97795			2030	7.21609	BAU	Gabon	Central
2035	3.43492	BAU	Cameroon	Central	2.50046	3.90665			2035	0.3832	BAU	Central African Republic	Central	0.220176	0.553867			2035	1.87199	BAU	Chad	Central	1.32775	2.37405			2040	3.06068	BAU	Congo, Dem. Rep.	Central	2.10622	3.76132			2050	1.13636	BAU	Congo, Rep.	Central	0.447788	1.74855			2035	7.21609	BAU	Gabon	Central
2040	3.18907	BAU	Cameroon	Central	2.42642	3.71212			2040	0.432295	BAU	Central African Republic	Central	0.30276	0.58407			2040	1.73133	BAU	Chad	Central	1.29427	2.32499			2050	3.66963	BAU	Congo, Dem. Rep.	Central	2.70256	4.53281												2040	7.37625	BAU	Gabon	Central
2050	2.6362	BAU	Cameroon	Central	2.01314	3.63731			2050	0.548837	BAU	Central African Republic	Central	0.393672	0.690962			2050	1.65298	BAU	Chad	Central	1.15169	2.1778												table	scenario_equitable								2050	7.29367	BAU	Gabon	Central
																											table	scenario_equitable								year	value_kg_n_per_ha	scenario	country	region	lo_kg_n_per_ha	hi_kg_n_per_ha
table	scenario_equitable								table	scenario_equitable								table	scenario_equitable								year	value_kg_n_per_ha	scenario	country	region	lo_kg_n_per_ha	hi_kg_n_per_ha			2030	20.1786	equitable	Congo, Rep.	Central	20.1786	20.1786			table	scenario_equitable
year	value_kg_n_per_ha	scenario	country	region	lo_kg_n_per_ha	hi_kg_n_per_ha			year	value_kg_n_per_ha	scenario	country	region	lo_kg_n_per_ha	hi_kg_n_per_ha			year	value_kg_n_per_ha	scenario	country	region	lo_kg_n_per_ha	hi_kg_n_per_ha			2030	18.1786	equitable	Congo, Dem. Rep.	Central	18.1786	18.1786			2035	30.2089	equitable	Congo, Rep.	Central	30.2089	30.2089			year	value_kg_n_per_ha	scenario	country	region
2030	20.1286	equitable	Cameroon	Central	20.1286	20.1286			2030	17.2357	equitable	Central African Republic	Central	17.2357	17.2357			2030	19.4929	equitable	Chad	Central	19.4929	19.4929			2035	28.7089	equitable	Congo, Dem. Rep.	Central	28.7089	28.7089			2040	40.2393	equitable	Congo, Rep.	Central	40.2393	40.2393			2030	26.2071	equitable	Gabon	Central
2035	30.1714	equitable	Cameroon	Central	30.1714	30.1714			2035	28.0018	equitable	Central African Republic	Central	28.0018	28.0018			2035	29.6946	equitable	Chad	Central	29.6946	29.6946			2040	39.2393	equitable	Congo, Dem. Rep.	Central	39.2393	39.2393			2050	60.3	equitable	Congo, Rep.	Central	60.3	60.3			2035	34.7304	equitable	Gabon	Central
2040	40.2143	equitable	Cameroon	Central	40.2143	40.2143			2040	38.7679	equitable	Central African Republic	Central	38.7679	38.7679			2040	39.8964	equitable	Chad	Central	39.8964	39.8964			2050	60.3	equitable	Congo, Dem. Rep.	Central	60.3	60.3												2040	43.2536	equitable	Gabon	Central
2050	60.3	equitable	Cameroon	Central	60.3	60.3			2050	60.3	equitable	Central African Republic	Central	60.3	60.3			2050	60.3	equitable	Chad	Central	60.3	60.3												table	scenario_optimistic								2050	60.3	equitable	Gabon	Central
																											table	scenario_optimistic								year	value_kg_n_per_ha	scenario	country	region	lo_kg_n_per_ha	hi_kg_n_per_ha
table	scenario_optimistic								table	scenario_optimistic								table	scenario_optimistic								year	value_kg_n_per_ha	scenario	country	region	lo_kg_n_per_ha	hi_kg_n_per_ha			2030	1.07171	optimistic	Congo, Rep.	Central	0.649886	2.41603			table	scenario_optimistic
year	value_kg_n_per_ha	scenario	country	region	lo_kg_n_per_ha	hi_kg_n_per_ha			year	value_kg_n_per_ha	scenario	country	region	lo_kg_n_per_ha	hi_kg_n_per_ha			year	value_kg_n_per_ha	scenario	country	region	lo_kg_n_per_ha	hi_kg_n_per_ha			2030	2.95945	optimistic	Congo, Dem. Rep.	Central	2.17799	3.6158			2035	1.17563	optimistic	Congo, Rep.	Central	0.659978	2.46618			year	value_kg_n_per_ha	scenario	country	region
2030	3.87808	optimistic	Cameroon	Central	2.89539	4.72913			2030	0.431196	optimistic	Central African Republic	Central	0.290577	0.522855			2030	1.86003	optimistic	Chad	Central	1.42453	2.23477			2035	3.01776	optimistic	Congo, Dem. Rep.	Central	1.93105	3.60978			2040	1.15975	optimistic	Congo, Rep.	Central	0.756482	2.47749			2030	12.7711	optimistic	Gabon	Central
2035	3.94647	optimistic	Cameroon	Central	2.78898	4.69167			2035	0.434648	optimistic	Central African Republic	Central	0.28905	0.526874			2035	1.82424	optimistic	Chad	Central	1.37648	2.30199			2040	3.02485	optimistic	Congo, Dem. Rep.	Central	2.05591	3.77648			2050	1.12907	optimistic	Congo, Rep.	Central	0.454868	2.22962			2035	12.8246	optimistic	Gabon	Central
2040	3.91991	optimistic	Cameroon	Central	2.84996	4.74349			2040	0.441502	optimistic	Central African Republic	Central	0.297201	0.530623			2040	1.76471	optimistic	Chad	Central	1.36306	2.26658			2050	2.9705	optimistic	Congo, Dem. Rep.	Central	1.96876	3.69449												2040	12.716	optimistic	Gabon	Central
2050	3.90952	optimistic	Cameroon	Central	2.80371	4.76748			2050	0.440532	optimistic	Central African Republic	Central	0.288557	0.532613			2050	1.78016	optimistic	Chad	Central	1.39885	2.28566												table	scenario_pessimistic								2050	12.786	optimistic	Gabon	Central
																											table	scenario_pessimistic								year	value_kg_n_per_ha	scenario	country	region	lo_kg_n_per_ha	hi_kg_n_per_ha
table	scenario_pessimistic								table	scenario_pessimistic								table	scenario_pessimistic								year	value_kg_n_per_ha	scenario	country	region	lo_kg_n_per_ha	hi_kg_n_per_ha			2030	1.11576	pessimistic	Congo, Rep.	Central	0.743618	2.42318			table	scenario_pessimistic
year	value_kg_n_per_ha	scenario	country	region	lo_kg_n_per_ha	hi_kg_n_per_ha			year	value_kg_n_per_ha	scenario	country	region	lo_kg_n_per_ha	hi_kg_n_per_ha			year	value_kg_n_per_ha	scenario	country	region	lo_kg_n_per_ha	hi_kg_n_per_ha			2030	2.32816	pessimistic	Congo, Dem. Rep.	Central	1.71084	3.27295			2035	1.13666	pessimistic	Congo, Rep.	Central	0.537004	2.41087			year	value_kg_n_per_ha	scenario	country	region
2030	3.1811	pessimistic	Cameroon	Central	2.62136	4.26275			2030	0.197438	pessimistic	Central African Republic	Central	0.0198055	0.350021			2030	1.7927	pessimistic	Chad	Central	1.34952	2.29727			2035	2.34493	pessimistic	Congo, Dem. Rep.	Central	1.57248	3.34427			2040	1.08575	pessimistic	Congo, Rep.	Central	0.427506	2.16424			2030	7.69625	pessimistic	Gabon	Central
2035	3.22464	pessimistic	Cameroon	Central	2.56899	4.41899			2035	0.216496	pessimistic	Central African Republic	Central	0.0485545	0.390114			2035	1.80786	pessimistic	Chad	Central	1.41506	2.29372			2040	2.28182	pessimistic	Congo, Dem. Rep.	Central	1.54156	3.24915			2050	1.07698	pessimistic	Congo, Rep.	Central	0.539489	2.33051			2035	7.82236	pessimistic	Gabon	Central
2040	3.19821	pessimistic	Cameroon	Central	2.48051	4.33282			2040	0.202661	pessimistic	Central African Republic	Central	0.0397376	0.35928			2040	1.82534	pessimistic	Chad	Central	1.42348	2.48265			2050	2.3135	pessimistic	Congo, Dem. Rep.	Central	1.54779	3.33474												2040	7.93016	pessimistic	Gabon	Central
2050	3.18717	pessimistic	Cameroon	Central	2.39291	4.378			2050	0.212526	pessimistic	Central African Republic	Central	0.0307814	0.386636			2050	1.81299	pessimistic	Chad	Central	1.34252	2.36506																					2050	7.66878	pessimistic	Gabon	Central
[truncated: 9 more columns]

## Sheet: SuppFig_S05
sheet_label	SuppFig_S05
subplot	country_burundi								subplot	country_comoros								subplot	country_djibouti								subplot	country_eritrea								subplot	country_ethiopia								subplot	country_kenya
table	historical								table	historical								table	historical								table	historical								table	historical								table	historical
year	value_kg_n_per_ha	country	region						year	value_kg_n_per_ha	country	region						year	value_kg_n_per_ha	country	region						year	value_kg_n_per_ha	country	region						year	value_kg_n_per_ha	country	region						year	value_kg_n_per_ha	country	region
2000	1.14	Burundi	East						2000	0.88	Comoros	East						2002	4.48	Djibouti	East						2000	9.59	Eritrea	East						2000	7.26	Ethiopia	East						2000	12.87	Kenya	East
2001	1.12	Burundi	East						2001	0.87	Comoros	East						2003	5.73	Djibouti	East						2001	6.54	Eritrea	East						2001	5.98	Ethiopia	East						2001	14.45	Kenya	East
2002	0.38	Burundi	East						2002	0.22	Comoros	East						2004	6.36	Djibouti	East						2002	5.02	Eritrea	East						2002	9.3	Ethiopia	East						2002	11.37	Kenya	East
2003	0.21	Burundi	East						2003	0.08	Comoros	East						2005	6.14	Djibouti	East						2003	1.14	Eritrea	East						2003	2.94	Ethiopia	East						2003	12.21	Kenya	East
2004	0.31	Burundi	East						2006	0.02	Comoros	East						2006	6.7	Djibouti	East						2004	0.01	Eritrea	East						2004	6.25	Ethiopia	East						2004	11.37	Kenya	East
2005	0.82	Burundi	East						2008	0.08	Comoros	East						2007	6.92	Djibouti	East						2005	2.31	Eritrea	East						2005	5.92	Ethiopia	East						2005	12.72	Kenya	East
2006	1.11	Burundi	East						2009	0.07	Comoros	East						2008	7.45	Djibouti	East						2006	0.01	Eritrea	East						2006	5.95	Ethiopia	East						2006	13.5	Kenya	East
2007	0.6	Burundi	East						2010	0.05	Comoros	East						2009	7.3	Djibouti	East						2007	0.98	Eritrea	East						2007	7.03	Ethiopia	East						2007	13.78	Kenya	East
2008	0.74	Burundi	East						2012	0.05	Comoros	East						2010	8.72	Djibouti	East						2009	0.78	Eritrea	East						2008	7.7	Ethiopia	East						2008	12.62	Kenya	East
2009	0.78	Burundi	East						2013	0.03	Comoros	East						2011	9.03	Djibouti	East						2010	0.4	Eritrea	East						2009	7.9	Ethiopia	East						2009	12.94	Kenya	East
2010	1.44	Burundi	East						2014	0.01	Comoros	East						2012	9.25	Djibouti	East						2011	0.82	Eritrea	East						2010	9.96	Ethiopia	East						2010	12.97	Kenya	East
2011	1.97	Burundi	East						2015	0.01	Comoros	East						2013	9.89	Djibouti	East						2012	0.89	Eritrea	East						2011	9.51	Ethiopia	East						2011	15.4	Kenya	East
2012	2.3	Burundi	East						2016	0.17	Comoros	East						2014	11.03	Djibouti	East						2013	1.19	Eritrea	East						2012	15.1	Ethiopia	East						2012	17.97	Kenya	East
2013	2.81	Burundi	East						2017	0.02	Comoros	East						2015	10.38	Djibouti	East						2014	1.36	Eritrea	East						2013	10.25	Ethiopia	East						2013	21.08	Kenya	East
2014	3.92	Burundi	East						2018	0.06	Comoros	East						2016	12.39	Djibouti	East						2015	1.47	Eritrea	East						2014	14	Ethiopia	East						2014	17.42	Kenya	East
2015	3.17	Burundi	East						2019	0.33	Comoros	East						2017	14.3	Djibouti	East						2016	2.78	Eritrea	East						2015	14.22	Ethiopia	East						2015	13.7	Kenya	East
2016	5.45	Burundi	East						2020	1.3	Comoros	East						2018	11.7	Djibouti	East						2017	2.56	Eritrea	East						2016	20.02	Ethiopia	East						2016	17.37	Kenya	East
2017	6.71	Burundi	East						2021	0.68	Comoros	East						2019	12.91	Djibouti	East						2018	6.72	Eritrea	East						2017	21.47	Ethiopia	East						2017	23.47	Kenya	East
2018	8.74	Burundi	East						2022	0.84	Comoros	East						2020	16.78	Djibouti	East						2019	5.97	Eritrea	East						2018	14.2	Ethiopia	East						2018	16.3	Kenya	East
2019	4.4	Burundi	East															2021	15.07	Djibouti	East						2020	5.04	Eritrea	East						2019	19.22	Ethiopia	East						2019	18.94	Kenya	East
2020	4.32	Burundi	East						table	scenario_BAU								2022	13.78	Djibouti	East						2021	2.99	Eritrea	East						2020	24.65	Ethiopia	East						2020	26.37	Kenya	East
2021	4.25	Burundi	East						year	value_kg_n_per_ha	scenario	country	region	lo_kg_n_per_ha	hi_kg_n_per_ha												2022	3.94	Eritrea	East						2021	25.35	Ethiopia	East						2021	23.22	Kenya	East
2022	4.19	Burundi	East						2030	2.12178	BAU	Comoros	East	0.408965	3.4954			table	scenario_BAU																	2022	23.07	Ethiopia	East						2022	12.9	Kenya	East
									2035	2.67534	BAU	Comoros	East	1.01018	4.64322			year	value_kg_n_per_ha	scenario	country	region	lo_kg_n_per_ha	hi_kg_n_per_ha			table	scenario_BAU
table	scenario_BAU								2040	3.20692	BAU	Comoros	East	1.49249	5.17794			2030	11.5405	BAU	Djibouti	East	7.5793	13.5791			year	value_kg_n_per_ha	scenario	country	region	lo_kg_n_per_ha	hi_kg_n_per_ha			table	scenario_BAU								table	scenario_BAU
year	value_kg_n_per_ha	scenario	country	region	lo_kg_n_per_ha	hi_kg_n_per_ha			2050	4.4371	BAU	Comoros	East	2.58515	6.16032			2035	8.82968	BAU	Djibouti	East	6.66483	12.5324			2030	2.40844	BAU	Eritrea	East	1.47669	5.02936			year	value_kg_n_per_ha	scenario	country	region	lo_kg_n_per_ha	hi_kg_n_per_ha			year	value_kg_n_per_ha	scenario	country	region
2030	10.052	BAU	Burundi	East	6.70393	12.9899												2040	13.0101	BAU	Djibouti	East	9.68226	16.1133			2035	2.59353	BAU	Eritrea	East	1.138	4.98699			2030	26.7775	BAU	Ethiopia	East	18.7737	45.0038			2030	23.8691	BAU	Kenya	East
2035	12.0194	BAU	Burundi	East	7.70361	14.565			table	scenario_equitable								2050	13.2085	BAU	Djibouti	East	10.039	16.0048			2040	2.40279	BAU	Eritrea	East	1.33252	4.82998			2035	35.0617	BAU	Ethiopia	East	22.4373	50.2872			2035	25.4455	BAU	Kenya	East
2040	12.9239	BAU	Burundi	East	9.44494	16.5656			year	value_kg_n_per_ha	scenario	country	region	lo_kg_n_per_ha	hi_kg_n_per_ha												2050	3.01029	BAU	Eritrea	East	1.34532	5.46762			2040	45.1021	BAU	Ethiopia	East	25.801	58.109			2040	26.2369	BAU	Kenya	East
2050	14.4539	BAU	Burundi	East	10.7985	17.33			2030	21.1143	equitable	Comoros	East	21.1143	21.1143			table	scenario_equitable																	2050	56.4891	BAU	Ethiopia	East	40.0562	72.3473			2050	33.0614	BAU	Kenya	East
									2035	33.7857	equitable	Comoros	East	33.7857	33.7857			year	value_kg_n_per_ha	scenario	country	region	lo_kg_n_per_ha	hi_kg_n_per_ha			table	scenario_equitable
table	scenario_equitable								2040	46.4571	equitable	Comoros	East	46.4571	46.4571			2030	30.3571	equitable	Djibouti	East	30.3571	30.3571			year	value_kg_n_per_ha	scenario	country	region	lo_kg_n_per_ha	hi_kg_n_per_ha			table	scenario_equitable								table	scenario_equitable
year	value_kg_n_per_ha	scenario	country	region	lo_kg_n_per_ha	hi_kg_n_per_ha			2050	71.8	equitable	Comoros	East	71.8	71.8			2035	40.7179	equitable	Djibouti	East	40.7179	40.7179			2030	23.3286	equitable	Eritrea	East	23.3286	23.3286			year	value_kg_n_per_ha	scenario	country	region	lo_kg_n_per_ha	hi_kg_n_per_ha			year	value_kg_n_per_ha	scenario	country	region
2030	23.5071	equitable	Burundi	East	23.5071	23.5071												2040	51.0786	equitable	Djibouti	East	51.0786	51.0786			2035	35.4464	equitable	Eritrea	East	35.4464	35.4464			2030	36.9929	equitable	Ethiopia	East	36.9929	36.9929			2030	29.7286	equitable	Kenya	East
2035	35.5804	equitable	Burundi	East	35.5804	35.5804			table	scenario_optimistic								2050	71.8	equitable	Djibouti	East	71.8	71.8			2040	47.5643	equitable	Eritrea	East	47.5643	47.5643			2035	45.6946	equitable	Ethiopia	East	45.6946	45.6946			2035	40.2464	equitable	Kenya	East
2040	47.6536	equitable	Burundi	East	47.6536	47.6536			year	value_kg_n_per_ha	scenario	country	region	lo_kg_n_per_ha	hi_kg_n_per_ha												2050	71.8	equitable	Eritrea	East	71.8	71.8			2040	54.3964	equitable	Ethiopia	East	54.3964	54.3964			2040	50.7643	equitable	Kenya	East
2050	71.8	equitable	Burundi	East	71.8	71.8			2030	3.1694	optimistic	Comoros	East	1.96012	5.09042			table	scenario_optimistic																	2050	71.8	equitable	Ethiopia	East	71.8	71.8			2050	71.8	equitable	Kenya	East
									2035	3.39756	optimistic	Comoros	East	2.18656	5.16514			year	value_kg_n_per_ha	scenario	country	region	lo_kg_n_per_ha	hi_kg_n_per_ha			table	scenario_optimistic
table	scenario_optimistic								2040	3.18504	optimistic	Comoros	East	1.97619	5.16835			2030	12.0543	optimistic	Djibouti	East	10.2572	13.5028			year	value_kg_n_per_ha	scenario	country	region	lo_kg_n_per_ha	hi_kg_n_per_ha			table	scenario_optimistic								table	scenario_optimistic
year	value_kg_n_per_ha	scenario	country	region	lo_kg_n_per_ha	hi_kg_n_per_ha			2050	3.24026	optimistic	Comoros	East	1.77481	5.24996			2035	12.0918	optimistic	Djibouti	East	10.4239	13.5008			2030	2.63145	optimistic	Eritrea	East	1.42118	5.48962			year	value_kg_n_per_ha	scenario	country	region	lo_kg_n_per_ha	hi_kg_n_per_ha			year	value_kg_n_per_ha	scenario	country	region
2030	12.4845	optimistic	Burundi	East	9.05655	13.9931												2040	12.1511	optimistic	Djibouti	East	10.6635	13.6136			2035	3.02651	optimistic	Eritrea	East	1.42736	5.26666			2030	39.2748	optimistic	Ethiopia	East	22.9737	54.5379			2030	26.1233	optimistic	Kenya	East
2035	12.7327	optimistic	Burundi	East	9.7525	14.8055			table	scenario_pessimistic								2050	12.1193	optimistic	Djibouti	East	10.3173	13.6597			2040	2.99088	optimistic	Eritrea	East	1.33421	5.74699			2035	42.7485	optimistic	Ethiopia	East	23.1471	53.7929			2035	27.7054	optimistic	Kenya	East
2040	12.7534	optimistic	Burundi	East	9.41152	14.0425			year	value_kg_n_per_ha	scenario	country	region	lo_kg_n_per_ha	hi_kg_n_per_ha												2050	2.67986	optimistic	Eritrea	East	1.13214	5.43076			2040	42.3954	optimistic	Ethiopia	East	22.9521	56.0443			2040	26.222	optimistic	Kenya	East
2050	12.6382	optimistic	Burundi	East	9.07593	14.5097			2030	2.00507	pessimistic	Comoros	East	0.425005	3.3569			table	scenario_pessimistic																	2050	40.6757	optimistic	Ethiopia	East	22.434	55.2077			2050	27.5453	optimistic	Kenya	East
									2035	2.03068	pessimistic	Comoros	East	0.460293	3.52326			year	value_kg_n_per_ha	scenario	country	region	lo_kg_n_per_ha	hi_kg_n_per_ha			table	scenario_pessimistic
table	scenario_pessimistic								2040	2.04571	pessimistic	Comoros	East	0.417016	3.33781			2030	9.07945	pessimistic	Djibouti	East	7.70009	12.466			year	value_kg_n_per_ha	scenario	country	region	lo_kg_n_per_ha	hi_kg_n_per_ha			table	scenario_pessimistic								table	scenario_pessimistic
year	value_kg_n_per_ha	scenario	country	region	lo_kg_n_per_ha	hi_kg_n_per_ha			2050	2.03428	pessimistic	Comoros	East	0.385481	3.39718			2035	9.76118	pessimistic	Djibouti	East	7.06691	12.4744			2030	2.1848	pessimistic	Eritrea	East	1.21327	4.42716			year	value_kg_n_per_ha	scenario	country	region	lo_kg_n_per_ha	hi_kg_n_per_ha			year	value_kg_n_per_ha	scenario	country	region
2030	11.7982	pessimistic	Burundi	East	8.70612	14.6047												2040	9.12509	pessimistic	Djibouti	East	7.52978	12.3772			2035	2.24397	pessimistic	Eritrea	East	0.957962	4.17624			2030	30.7572	pessimistic	Ethiopia	East	23.2196	51.8585			2030	24.8775	pessimistic	Kenya	East
2035	12.3	pessimistic	Burundi	East	8.69215	15.5446												2050	9.61611	pessimistic	Djibouti	East	7.13059	12.76			2040	2.06638	pessimistic	Eritrea	East	0.793593	3.96596			2035	31.7793	pessimistic	Ethiopia	East	20.3247	53.0811			2035	23.9622	pessimistic	Kenya	East
2040	12.0209	pessimistic	Burundi	East	8.59943	14.5852																					2050	2.15029	pessimistic	Eritrea	East	0.915939	4.31292			2040	30.8465	pessimistic	Ethiopia	East	18.4167	54.1663			2040	23.445	pessimistic	Kenya	East
2050	11.7961	pessimistic	Burundi	East	8.43628	15.0708																														2050	31.2283	pessimistic	Ethiopia	East	18.2032	54.6656			2050	23.9736	pessimistic	Kenya	East
[truncated: 44 more columns]

[truncated: 24 more sheets: SuppFig_S06, SuppFig_S07, SuppFig_S08, SuppFig_S09, SuppFig_S10, SuppFig_S11, SuppFig_S12, SuppFig_S13, SuppFig_S14, SuppFig_S15, SuppFig_S16, SuppFig_S17, SuppFig_S18, SuppFig_S19, SuppFig_S20, SuppFig_S21, SuppFig_S22, SuppFig_S23, SuppFig_S24, SuppFig_S25 …]
